# Supplementary material for: Direct experimental and computational evidence for the dihydride pathway in TangPHOS-Rh catalysed asymmetric hydrogenation
Source: Royal Society of Chemistry journal article supplement (doi:10.1039/c3dt52383g), 2013-10-16
Supplement: c3dt52383g.pdf [file c3dt52383g.pdf]

## Electronic Supplementary Information

for the paper

### Direct Experimental and Computational Evidence for the Dihydride Pathway in TangPHOS-Rh Catalyzed Asymmetric Hydrogenation

by

Ilya D. Gridnev,<sup>\*a</sup> Christina Kohrt,<sup>b</sup> Yuanyuan Liu,<sup>a</sup> and Detlef Heller<sup>\*b</sup>

#### Contents

|                                                              |       |
|--------------------------------------------------------------|-------|
| Fig. S1.....                                                 | 2     |
| Fig.S2.....                                                  | 3     |
| Fig.S3.....                                                  | 4     |
| Fig.S4.....                                                  | 5     |
| Summary for computation.....                                 | 6-7   |
| Comparing results for B3LYP and TPSS functionals.....        | 8     |
| Structures of the transition states.....                     | 9-13  |
| Possible pathways for the H <sub>2</sub> approach to 1c..... | 14-15 |
| Energies and Free energies of computed structures.....       | 16    |
| Cartesian Coordinates.....                                   | 17-34 |

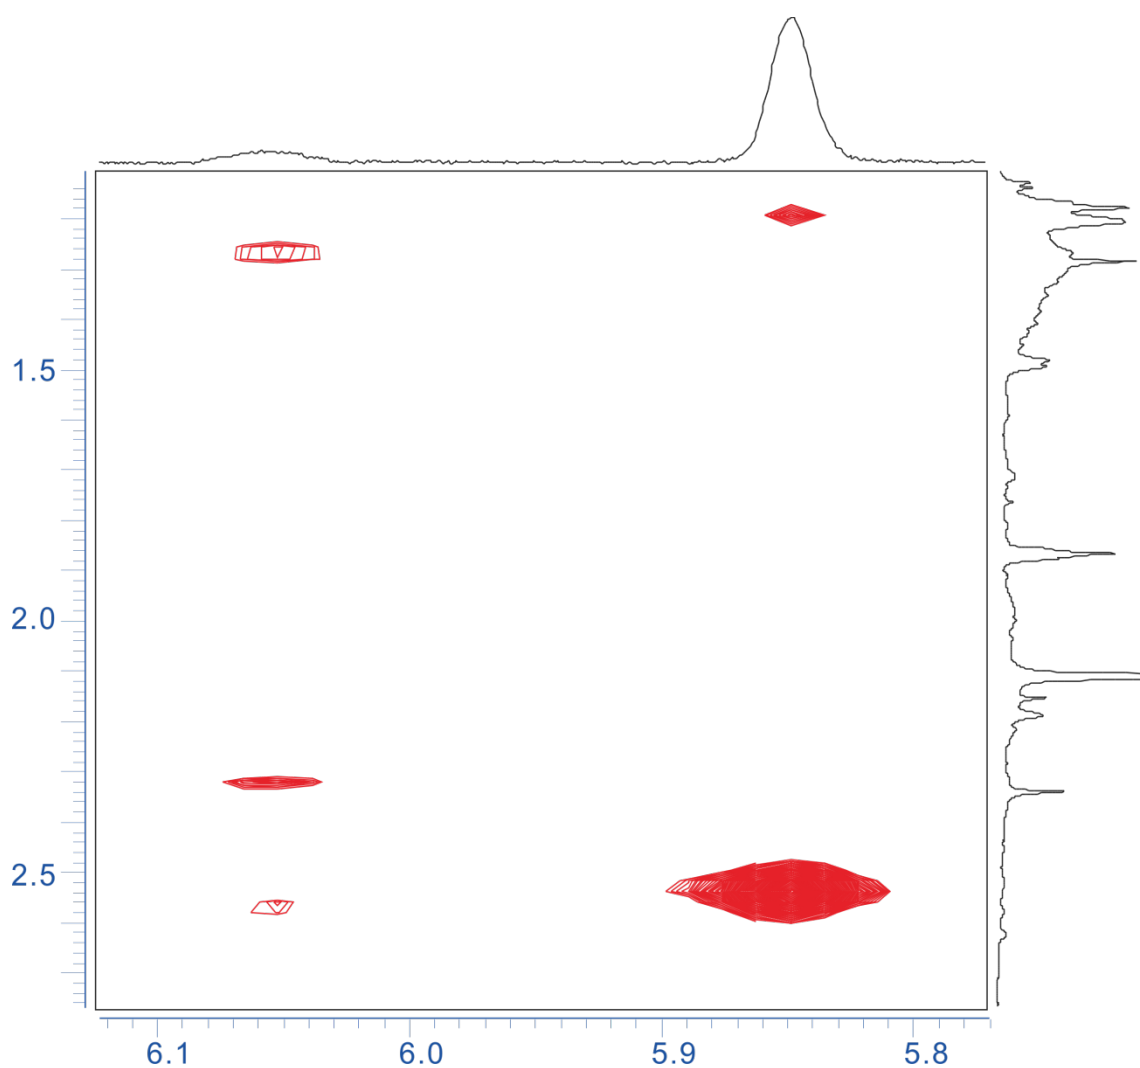

**Figure S1.** Section plot of phase sensitive 2D  $^1\text{H}$ - $^1\text{H}$  ROESY spectrum (600 MHz,  $\text{CD}_3\text{OD}$ , 203K) of the sample obtained by adding 2 equivalents of MAC to a solution of **2** in  $\text{CD}_3\text{OD}$ .

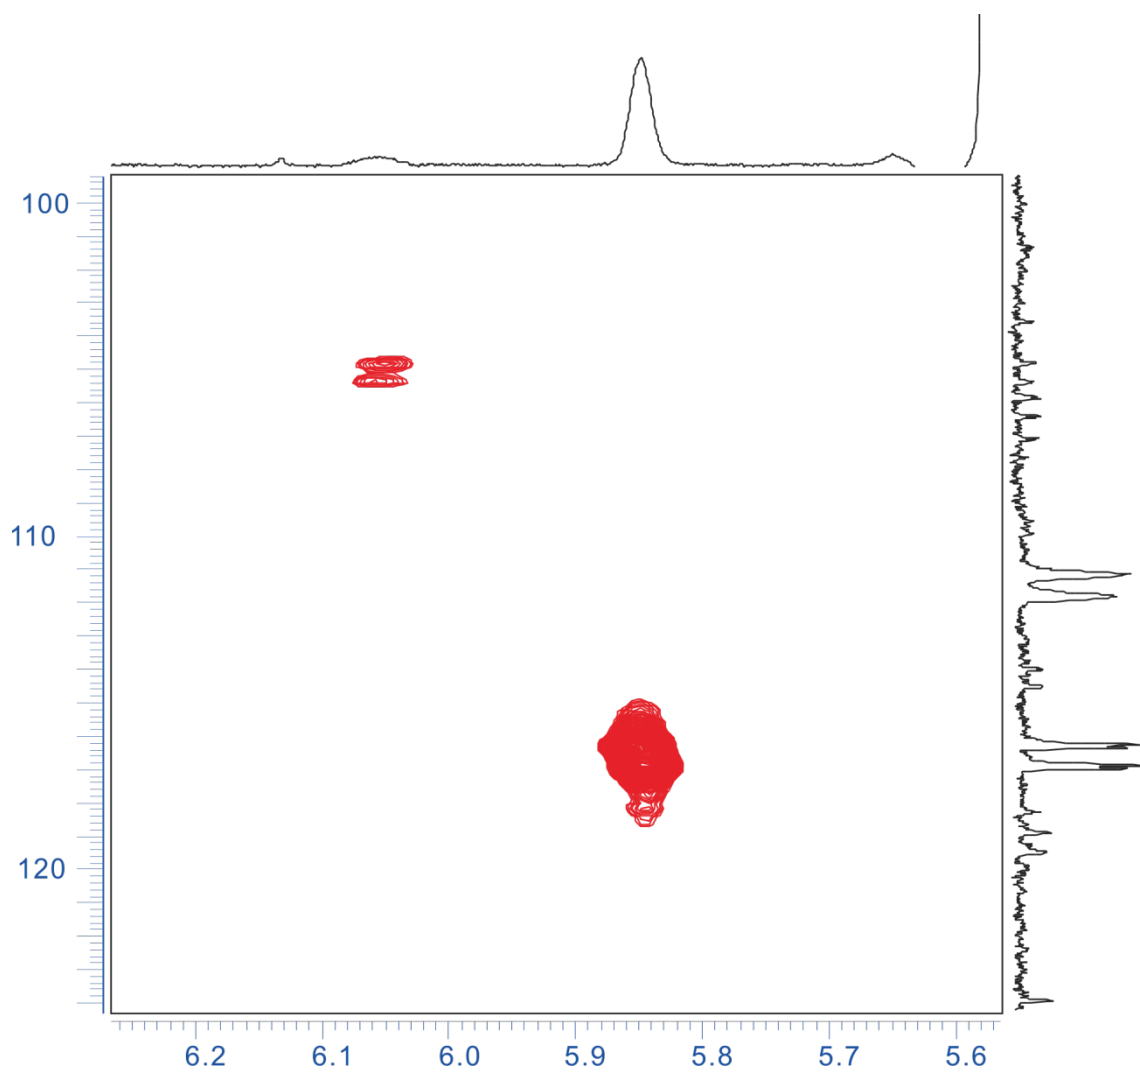

**Figure S2.** Section plot of 2D  $^1\text{H}$ - $^{31}\text{P}$  NMR spectrum (600 MHz,  $\text{CD}_3\text{OD}$ , 203 K) of the sample obtained by adding 2 equivalents of MAC to a solution of **2** in  $\text{CD}_3\text{OD}$ .

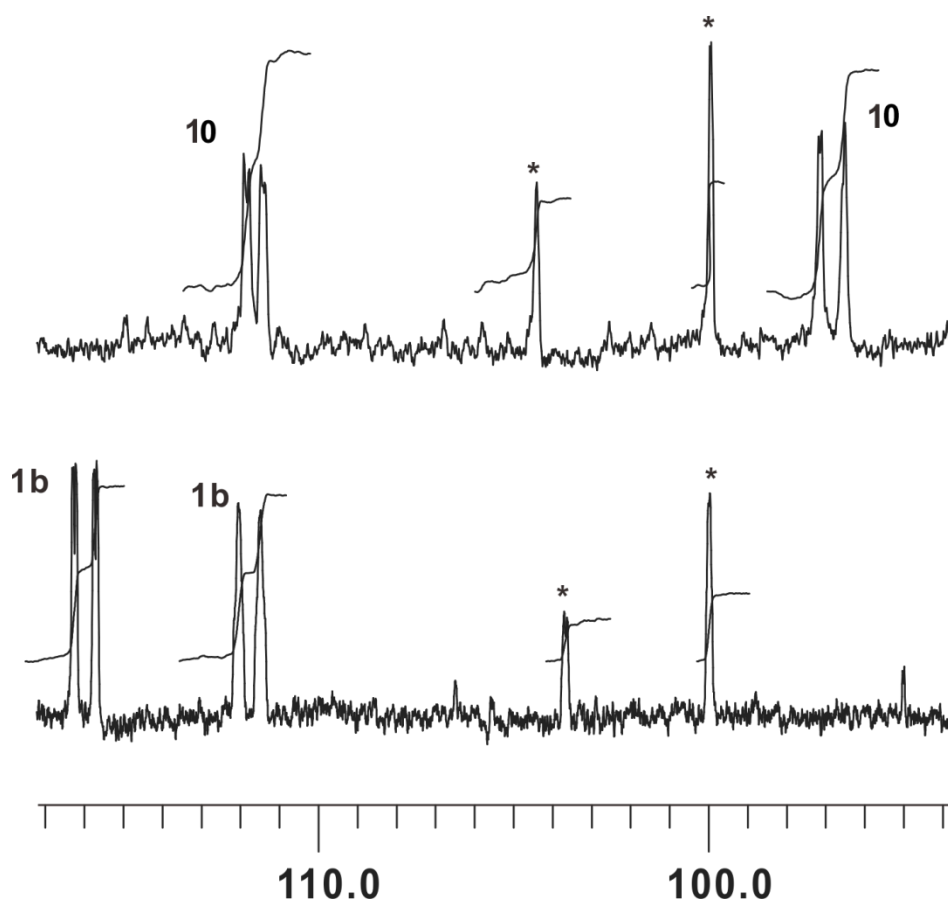

**Figure S3.** Section plots of  $^{31}\text{P}$  NMR spectra ( $\text{CD}_3\text{OD}$ , 193 K) of the sample obtained by adding 2 equivalents of MAC to a solution of **2** in  $\text{CD}_3\text{OD}$ : bottom: 283 MHz; top: 243 MHz after 10 min hydrogenation at 193 K. The asterisks indicate the resonances of the complexes with one phosphorus atom of the TangPHOS ligand dissociated from Rh.  
寺田研

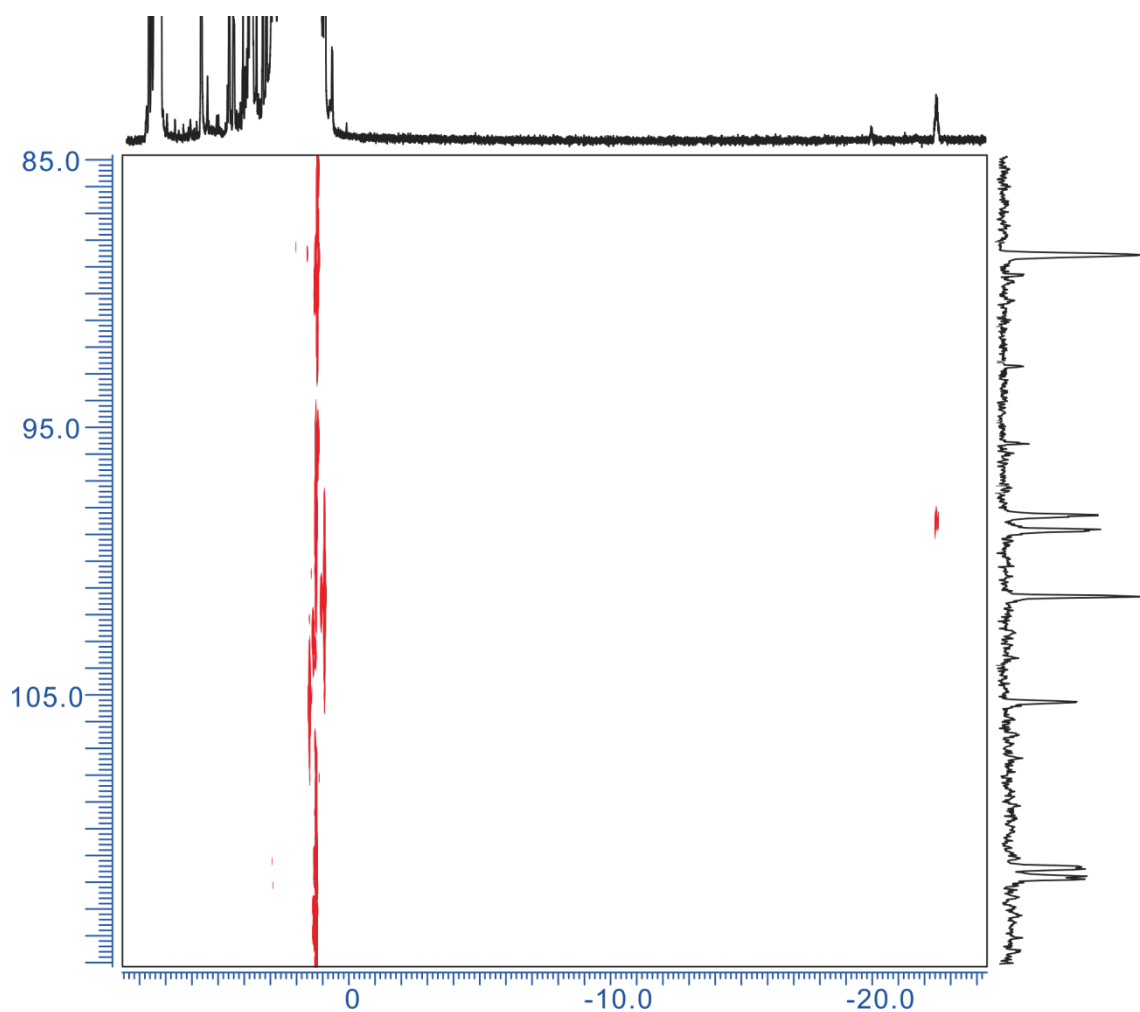

**Figure S4.** 2D  $^1\text{H}$ - $^{31}\text{P}$  HMBC NMR spectrum (600 MHz,  $\text{CD}_3\text{OD}$ , 203 K) of the sample obtained by adding 2 equivalents of MAC to a solution of **2** in  $\text{CD}_3\text{OD}$  followed by hydrogenation for 10 min at 193 K.

### Summary for the calculation

All computations were carried out using the hybrid Becke functional (B3)<sup>S1</sup> for electron exchange and the correlation functional of Lee, Yang and Parr (LYP),<sup>S2</sup> as implemented in the GAUSSIAN 09 software package.<sup>S3</sup> For rhodium the SDD basis set with the associated effective core potential was employed.<sup>S4</sup> All other atoms were modeled at the 6-31G+(2d,2p) level of theory.<sup>S5</sup> The following additional diffuse function was applied for the phosphorus atom:

```
P 0
D 1 1.0
0.55 0.100D+01
```

Geometry optimizations were performed with the account of the solvent effects (CPCM, methanol) without applying any geometry constraints ( $C_1$  symmetry).

Starting geometries for the transition state search were located either by QST2 or QST3 procedures, or by the guess based on the structure of the previously found TS. The transition states were subsequently fully optimized as saddle points of first order, employing the Berny algorithm.<sup>S6</sup> Frequency calculations were carried out to confirm the nature of the stationary points, yielding zero imaginary frequencies for all Rh complexes and one imaginary frequency for all transition states, which represented the vector for the appropriate bond formation.

(S1) (a) Becke, A. D. *J. Chem. Phys.* **1993**, *98*, 1372. (b) Becke, A. D. *J. Chem. Phys.* **1993**, *98*, 5648.

(S2) Lee, C.; Yang, W.; Parr, R. G. *Phys. Rev. B* **1988**, *37*, 785.

(S3) Gaussian 09, Revision A.02, Frisch, M. J.; Trucks, G. W.; Schlegel, H. B.; Scuseria G. E.; Robb, M. A.; Cheeseman, J. R.; Scalmani, G.; Barone, V.; Mennucci, B.; Petersson, G. A.; Nakatsuji, H.; Caricato, M.; Li, X.; Hratchian, H. P.; Izmaylov, A.

F.; Bloino, J.; Zheng, G.; Sonnenberg, J. L.; Hada, M.; Ehara, M.; Toyota, K.; Fukuda, R.; Hasegawa, J.; Ishida, M.; Nakajima, T.; Honda, Y.; Kitao, O.; Nakai, H.; Vreven, T.; Montgomery, J. A.; Peralta, J. E.; Ogliaro, F.; Bearpark, M.; Heyd, J. J.; Brothers, E.; Kudin, K. N.; Staroverov, V. N.; Kobayashi, R.; Normand, J.; Raghavachari, K.; Rendell, A.; Burant, J. C.; Iyengar, S. S.; Tomasi, J.; Cossi, M.; Rega, N.; Millam, J. M.; Klene, M.; Knox, J. E.; Cross, J. B.; Bakken, V.; Adamo, C.; Jaramillo, J.; Gomperts, R.; Stratmann, R. E.; Yazyev, O.; Austin, A. J.; Cammi, R.; Pomelli, C.; Ochterski, J. W.; Martin, R. L.; Morokuma, K.; Zakrzewski, V. G.; Voth, G. A.; Salvador, P.; Dannenberg, J. J.; Dapprich, S.; Daniels, A. D.; Farkas, O.; Foresman, J. B.; Ortiz, J. V.; Cioslowski, J.; Fox, D. J.; Gaussian, Inc., Wallingford CT, 2009.

(S4) Andrae, D.; Haeussermann, U.; Dolg, M.; Stoll, H.; Preuss, H. *Theor. Chim. Acta* **1990**, *77*, 123.

(S5) (a) Ditchfield, R.; Hehre, W. J.; Pople, J. A. *J. Chem. Phys.* **1971**, *54*, 724. (b) Hehre, W. J.; Ditchfield, R.; Pople, J. A. *J. Chem. Phys.* **1972**, *56*, 2257. (c) Hariharan, P. C.; Pople, J. A. *Theo Chim. Acta* **1973**, *28*, 213. (d) Hariharan, P. C.; Pople, J. A. *Mol. Phys.* **1974**, *27*, 209. (e) Gordon, M. S. *Chem. Phys. Lett.* **1980**, *76*, 163.

(S6) Peng, C. Y.; Schlegel, B. *Isr. J. Chem.* **1994**, *34*, 449

Comparing results for B3LYP and TPSS functionals (both for SDD(Rh)/6-31+G(2d,2p)(all others)/CPCM(MeOH):

| Compound  | Relative stability B3LYP ( $\Delta G^{298}$ ) | Relative stability TPSS ( $\Delta G^{298}$ ) |
|-----------|-----------------------------------------------|----------------------------------------------|
| <b>1a</b> | <b>0 kcal/mol</b>                             | <b>0 kcal/mol</b>                            |
| <b>1b</b> | <b>2.6 kcal/mol</b>                           | <b>4.6 kcal/mol</b>                          |
| <b>1c</b> | <b>1.5 kcal/mol</b>                           | <b>3.6 kcal/mol</b>                          |

As can be seen from the above data, both functionals predict the similar trend in stabilities for the catalyst-substrate complexes, but TPSS suggests larger differences in the relative stabilities of **1a** and **1,b,c**. Since we were able to detect **1c** in equilibrium with **1a** by NMR, the results of B3LYP seem to conform to the experimental data slightly better. Besides using the same level of theory as in the previous publication makes possible the comparison of the similar data, *e.g.* the relative stabilities of monohydrides. Hence, we have used the B3LYP functional in this research.

We have also attempted to use wB97XD functional with the same basis set, but it resulted in very long convergence and impossibility of the frequency analysis in certain cases.



Structures of the Transition States:

**TS1**,  $v = 710.9i$

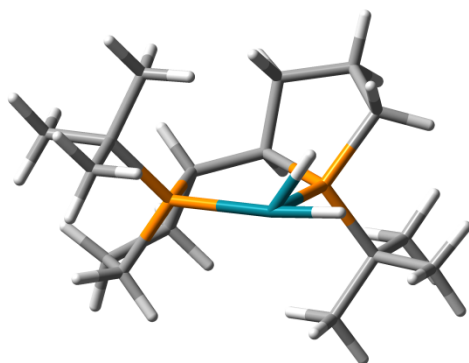

**TS2**,  $v = 804.5i$

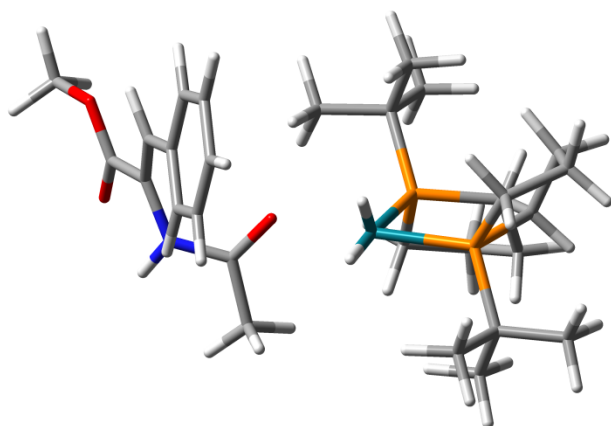

**TS3**,  $v = 61.2i$

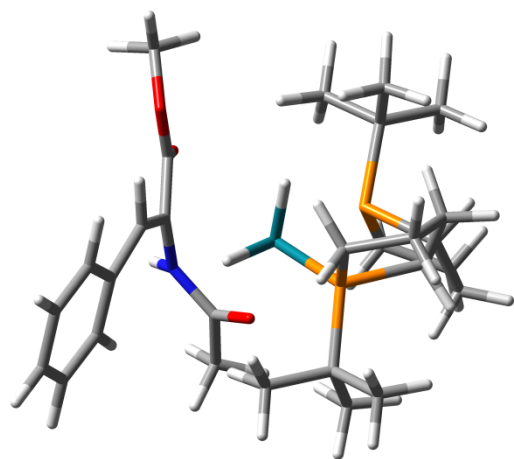

Displacement vectors in the **TS3**

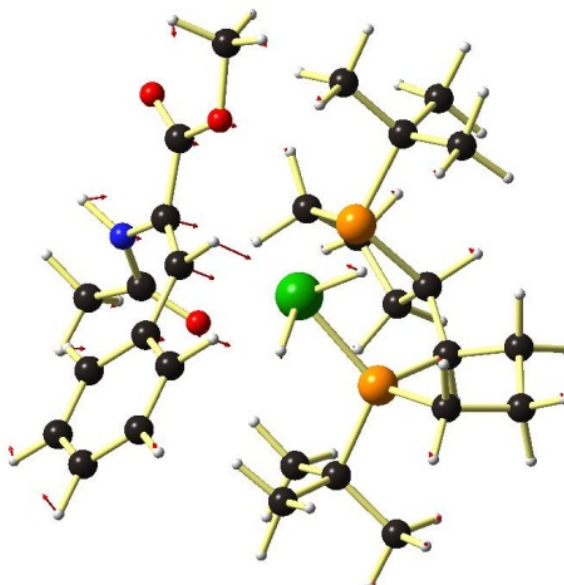

**TS4**,  $\nu = 264.6i$

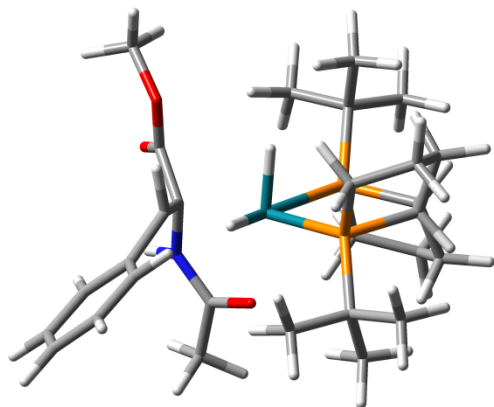

**TS5**,  $\nu = 833.0i$

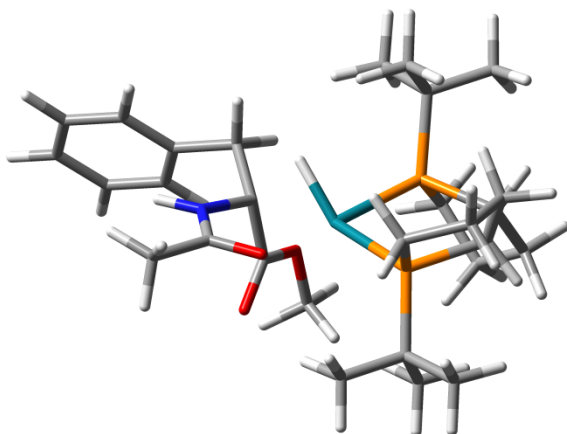

**TS6**,  $v = 787.2i$

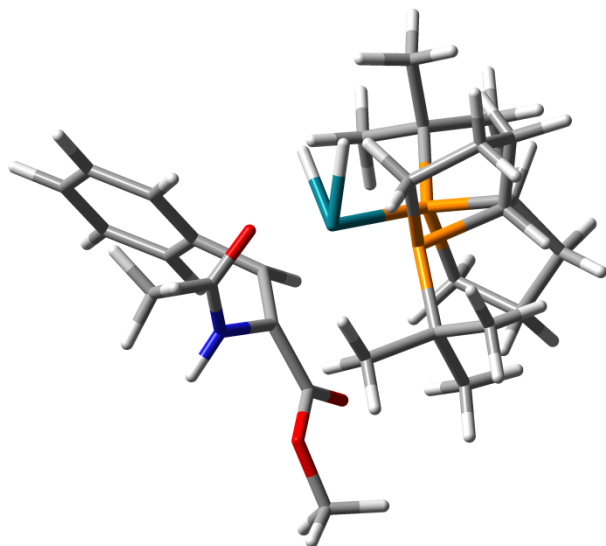

**TS7**,  $v = 521.4i$

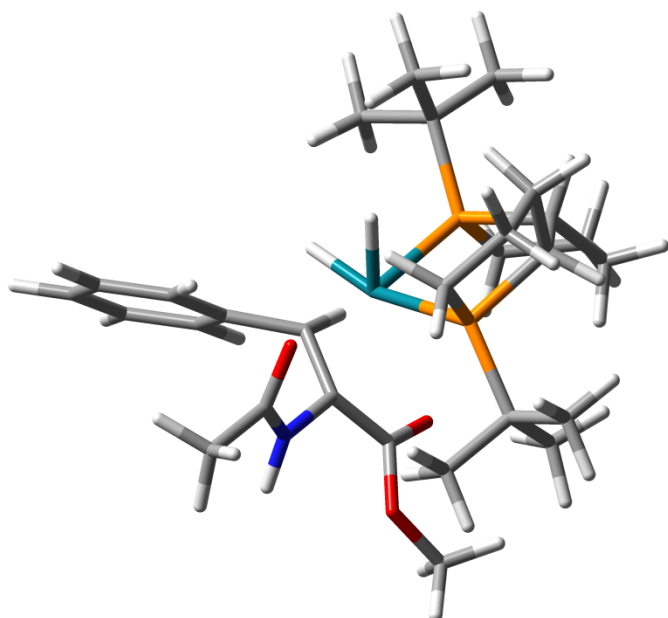

**TS8**,  $\nu = 875.0i$

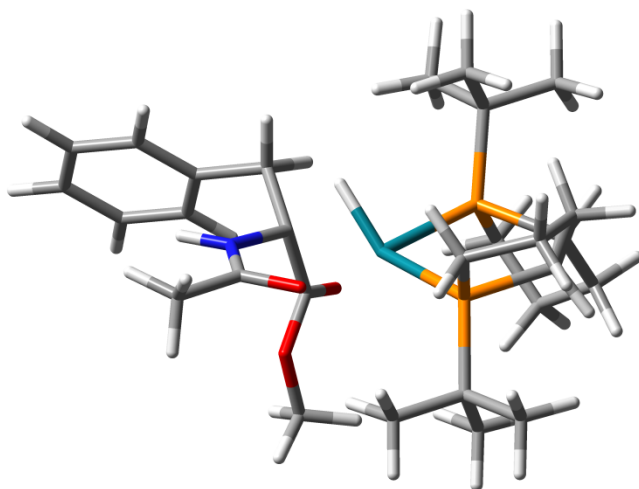

**TS9**,  $\nu = 845.5i$

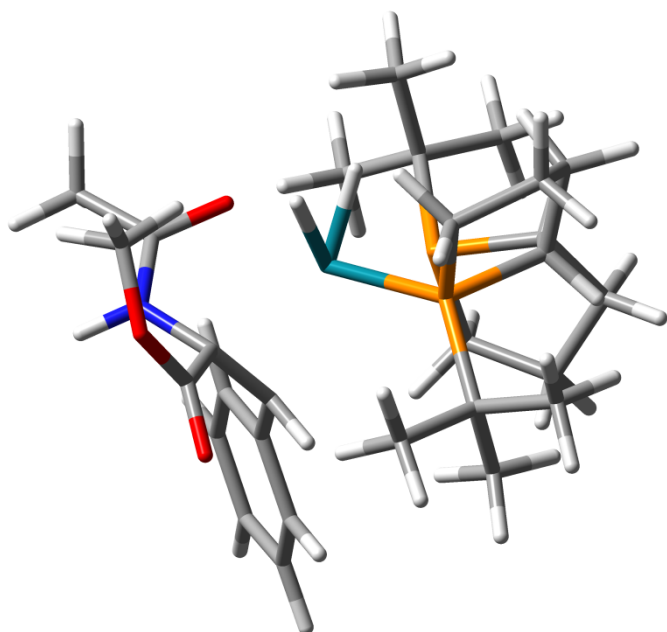

### Possible pathways for the H<sub>2</sub> approach to **1c**.

In general there are four possible pathways for the molecule of dihydrogen to approach a Rh(I) catalyst-substrate complex with C<sub>2</sub>-symmetric diphosphine ligand (Scheme S1)

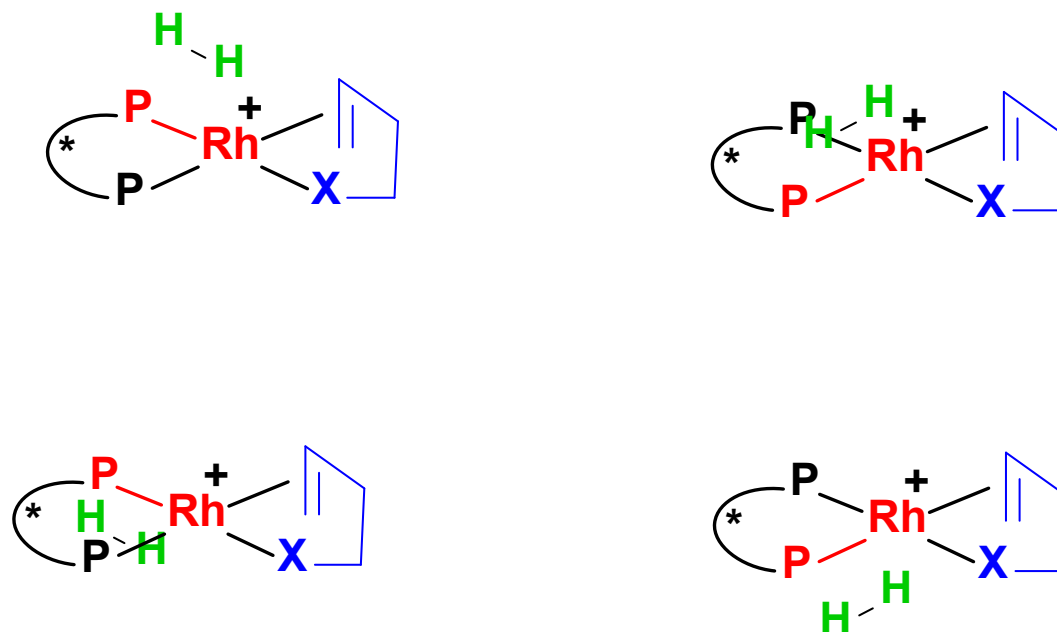

However, in the real compound, *e.g.* **1c**, only one pathway is possible (Fig. S5)

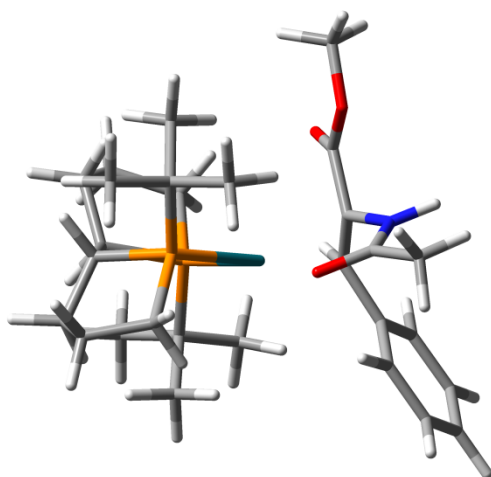

Fig. S5. Optimized structure of **1c**

Approach from the upper side (Fig. S5) is effectively blocked by the carboxymethyl group of the coordinated substrate and both substituents on the phosphorus atoms, because the substrate is bent accordingly with respect of the chelate plane of the complex.

Approach from the bottom side is open for both possibilities sterically. However, only one molecular hydride complex **11** (with the H<sub>2</sub> molecule over the Rh–P bond *trans*- to the coordinated double bond) could be located. Attempts to locate the second possible molecular hydride complex inevitably resulted in **11**. This is in accord with the previously found regularities (ref. 8 in the paper).

| Compound, Mechanism       | ZPVE Corrected Energy, a.u. | Free Energy (298 K), a. u. | System of the same content                     | Normalized Free Energy (298 K), a. u. for the system of the same content |
|---------------------------|-----------------------------|----------------------------|------------------------------------------------|--------------------------------------------------------------------------|
| <b>1a</b>                 | -2167.216536                | -2167.287119               | <b>1a + (MeOH)<sub>2</sub> + H<sub>2</sub></b> | -2399.890083                                                             |
| <b>Dihydride</b>          |                             |                            |                                                |                                                                          |
| <b>2</b>                  | -1653.215615                | -1653.275042               | <b>2 + MAC + H<sub>2</sub></b>                 | -2399.897341                                                             |
| <b>4</b>                  | -1654.388798                | -1654.453135               | <b>4 + MAC</b>                                 | -2399.895149                                                             |
| <b>TS1</b>                | -1654.383283                | -1654.44724                | <b>TS1 + MAC</b>                               | -2399.889255                                                             |
| <b>5</b>                  | -1654.386521                | -1654.447199               | <b>5 + MAC</b>                                 | -2399.889213                                                             |
| <b>3</b>                  | -746.601649                 | -746.649305                | <b>3 + 2</b>                                   | -2399.924347                                                             |
| <b>Semi-Dihydride</b>     |                             |                            |                                                |                                                                          |
| <b>6</b>                  | -2167.207454                | -2167.282415               | <b>6 + (MeOH)<sub>2</sub> + H<sub>2</sub></b>  | -2399.889542                                                             |
| <b>7</b>                  | -2168.384014                | -2168.46031                | <b>7 + (MeOH)<sub>2</sub></b>                  | -2399.887152                                                             |
| <b>TS2</b>                | -2168.378198                | -2168.453991               | <b>TS2 + MeOH)<sub>2</sub></b>                 | -2399.880833                                                             |
| <b>8</b>                  | -2168.385195                | -2168.460703               | <b>8 + (MeOH)<sub>2</sub></b>                  | -2399.887545                                                             |
| <b>TS3</b>                | -2168.372065                | -2168.443587               | <b>TS3 + MeOH)<sub>2</sub></b>                 | -2399.870429                                                             |
| <b>9</b>                  | -2168.377643                | -2168.448902               | <b>9 + (MeOH)<sub>2</sub></b>                  | -2399.875744                                                             |
| <b>TS4</b>                | -2168.378166                | -2168.448315               | <b>TS4 + MeOH)<sub>2</sub></b>                 | -2399.875157                                                             |
| <b>10</b>                 | -2168.39795                 | -2168.46874                | <b>10 + (MeOH)<sub>2</sub></b>                 | -2399.895582                                                             |
| <b>TS5</b>                | -2168.376954                | -2168.448011               | <b>TS5 + MeOH)<sub>2</sub></b>                 | -2399.874853                                                             |
| <b>MAC</b>                | -745.399528                 | -745.444733                |                                                |                                                                          |
| <b>(MeOH)<sub>2</sub></b> | -231.394557                 | -231.426842                |                                                |                                                                          |
| <b>Semi-Unsaturated</b>   |                             |                            |                                                |                                                                          |
| <b>1c</b>                 | -2167.213445                | -2167.284594               | <b>1c + (MeOH)<sub>2</sub> + H<sub>2</sub></b> | -2399.891721                                                             |
| <b>11</b>                 | -2168.369253                | -2168.439662               | <b>11 + (MeOH)<sub>2</sub></b>                 | -2399.866504                                                             |
| <b>TS6</b>                | -2168.367437                | -2168.367437               | <b>TS6 + MeOH)<sub>2</sub></b>                 | -2399.864946                                                             |
| <b>12</b>                 | -2168.374597                | -2168.444783               | <b>12 + (MeOH)<sub>2</sub></b>                 | -2399.871625                                                             |
| <b>TS7</b>                | -2168.37312                 | -2168.442815               | <b>TS7 + MeOH)<sub>2</sub></b>                 | -2399.869657                                                             |
| <b>13</b>                 | -2169.094639                | -2168.456555               | <b>13 + (MeOH)<sub>2</sub></b>                 | -2399.883397                                                             |
| <b>TS8</b>                | -2168.377805                | -2168.336441               | <b>TS8 + MeOH)<sub>2</sub></b>                 | -2399.924347                                                             |
| <b>Unsaturated</b>        |                             |                            |                                                |                                                                          |
| <b>1b</b>                 | -2167.212431                | -2167.282956               | <b>1b + (MeOH)<sub>2</sub> + H<sub>2</sub></b> | -2399.890083                                                             |
| <b>14</b>                 | -2168.355124                | -2168.423207               | <b>14 + (MeOH)<sub>2</sub></b>                 | -2399.850049                                                             |
| <b>TS9</b>                | -2168.341336                | -2168.410993               | <b>TS9 + MeOH)<sub>2</sub></b>                 | -2399.837835                                                             |
| <b>15</b>                 | -2168.363502                | -2168.437271               | <b>15 + (MeOH)<sub>2</sub></b>                 | -2399.864113                                                             |



Cartesian coordinates of the optimized structures

1a

Standard orientation:

| Center Number | Atomic Number | Atomic Type | Coordinates (Angstroms) |           |           |
|---------------|---------------|-------------|-------------------------|-----------|-----------|
|               |               |             | X                       | Y         | Z         |
| 1             | 6             | 0           | -2.484063               | -1.972726 | 0.567074  |
| 2             | 6             | 0           | -2.816060               | -0.577983 | 1.154395  |
| 3             | 15            | 0           | -0.936131               | -1.966604 | -0.497181 |
| 4             | 15            | 0           | -1.704836               | 0.849734  | 0.593647  |
| 5             | 6             | 0           | -1.789327               | -2.497969 | -2.069163 |
| 6             | 1             | 0           | -1.526500               | -3.534674 | -2.288629 |
| 7             | 1             | 0           | -1.447152               | -1.889262 | -2.907287 |
| 8             | 6             | 0           | -1.518167               | 1.577925  | 2.295175  |
| 9             | 6             | 0           | 0.107972                | -3.457300 | 0.042416  |
| 10            | 6             | 0           | 0.714495                | -3.170704 | 1.427699  |
| 11            | 1             | 0           | 1.356204                | -2.290077 | 1.416628  |
| 12            | 1             | 0           | -0.055204               | -3.028757 | 2.191855  |
| 13            | 1             | 0           | 1.323307                | -4.028348 | 1.733754  |
| 14            | 6             | 0           | 1.232574                | -3.656457 | -0.991478 |
| 15            | 1             | 0           | 1.863860                | -4.494212 | -0.675754 |
| 16            | 1             | 0           | 0.838638                | -3.897101 | -1.983067 |
| 17            | 1             | 0           | 1.861313                | -2.769606 | -1.081265 |
| 18            | 6             | 0           | -0.742965               | -4.740541 | 0.129537  |
| 19            | 1             | 0           | -1.189619               | -5.021787 | -0.826360 |
| 20            | 1             | 0           | -0.090517               | -5.565293 | 0.436318  |
| 21            | 1             | 0           | -1.538683               | -4.664219 | 0.874584  |
| 22            | 6             | 0           | -2.817981               | 2.063852  | -0.368876 |
| 23            | 6             | 0           | -3.327337               | 1.389359  | -1.654590 |
| 24            | 1             | 0           | -2.507751               | 1.017582  | -2.276128 |
| 25            | 1             | 0           | -4.011271               | 0.566164  | -1.440514 |
| 26            | 1             | 0           | -3.884219               | 2.124959  | -2.244925 |
| 27            | 6             | 0           | -1.990850               | 3.300526  | -0.758841 |
| 28            | 1             | 0           | -2.634225               | 3.997125  | -1.306833 |
| 29            | 1             | 0           | -1.606728               | 3.826277  | 0.116125  |
| 30            | 1             | 0           | -1.154072               | 3.037026  | -1.408783 |
| 31            | 6             | 0           | -4.024670               | 2.522122  | 0.473235  |
| 32            | 1             | 0           | -3.723095               | 3.078325  | 1.363419  |
| 33            | 1             | 0           | -4.635868               | 3.195136  | -0.138277 |
| 34            | 1             | 0           | -4.667736               | 1.694632  | 0.781133  |
| 35            | 1             | 0           | -1.578606               | 2.666728  | 2.274147  |
| 36            | 1             | 0           | -0.525336               | 1.314422  | 2.664899  |
| 37            | 45            | 0           | 0.092645                | 0.139426  | -0.623472 |
| 38            | 8             | 0           | 1.473036                | -0.484898 | -2.175825 |
| 39            | 6             | 0           | 2.363259                | 0.358363  | -2.449900 |
| 40            | 7             | 0           | 2.532650                | 1.428331  | -1.673427 |
| 41            | 1             | 0           | 3.178171                | 2.149640  | -1.966282 |
| 42            | 6             | 0           | 3.266090                | 0.153605  | -3.631010 |
| 43            | 1             | 0           | 2.650909                | -0.016766 | -4.517077 |
| 44            | 1             | 0           | 3.928198                | 1.002267  | -3.802084 |
| 45            | 1             | 0           | 3.868746                | -0.743921 | -3.468269 |
| 46            | 6             | 0           | 1.663420                | 1.724779  | -0.561247 |
| 47            | 6             | 0           | 1.664186                | 0.931720  | 0.638987  |
| 48            | 1             | 0           | 1.177771                | 1.453793  | 1.452146  |
| 49            | 6             | 0           | 2.700523                | 0.016045  | -1.167625 |
| 50            | 6             | 0           | 2.795917                | -0.066914 | 2.573630  |
| 51            | 6             | 0           | 3.619365                | -0.734881 | 0.409663  |
| 52            | 6             | 0           | 3.765634                | -0.850260 | 3.195284  |
| 53            | 1             | 0           | 2.103040                | 0.501748  | 3.184899  |
| 54            | 6             | 0           | 4.594531                | -1.514106 | 1.030888  |
| 55            | 1             | 0           | 3.579069                | -0.732801 | -0.667404 |
| 56            | 6             | 0           | 4.674905                | -1.578364 | 2.424250  |
| 57            | 1             | 0           | 3.813029                | -0.887649 | 4.278132  |

|    |   |   |           |           |           |
|----|---|---|-----------|-----------|-----------|
| 58 | 1 | 0 | 5.290663  | -2.078854 | 0.420299  |
| 59 | 1 | 0 | 5.433287  | -2.189332 | 2.901127  |
| 60 | 6 | 0 | 1.417900  | 3.187205  | -0.496575 |
| 61 | 8 | 0 | 1.693044  | 3.946005  | -1.413120 |
| 62 | 8 | 0 | 0.939618  | 3.612665  | 0.681930  |
| 63 | 6 | 0 | 0.808255  | 5.039378  | 0.841025  |
| 64 | 1 | 0 | 0.375252  | 5.179331  | 1.829269  |
| 65 | 1 | 0 | 1.789698  | 5.512659  | 0.784101  |
| 66 | 1 | 0 | 0.155740  | 5.456413  | 0.073399  |
| 67 | 6 | 0 | -2.717103 | -0.546922 | 2.700087  |
| 68 | 1 | 0 | -3.576639 | -1.054969 | 3.147361  |
| 69 | 1 | 0 | -1.821151 | -1.098315 | 3.007547  |
| 70 | 6 | 0 | -3.579769 | -2.626163 | -0.320321 |
| 71 | 1 | 0 | -3.561121 | -3.707015 | -0.152890 |
| 72 | 1 | 0 | -4.575362 | -2.280839 | -0.026479 |
| 73 | 6 | 0 | -2.596939 | 0.907276  | 3.169972  |
| 74 | 1 | 0 | -3.554854 | 1.421889  | 3.057790  |
| 75 | 1 | 0 | -2.324268 | 0.961993  | 4.227665  |
| 76 | 6 | 0 | -3.302696 | -2.346385 | -1.809495 |
| 77 | 1 | 0 | -3.874107 | -3.026859 | -2.446885 |
| 78 | 1 | 0 | -3.616860 | -1.335001 | -2.069726 |
| 79 | 1 | 0 | -3.835200 | -0.306481 | 0.867005  |
| 80 | 1 | 0 | -2.286008 | -2.632455 | 1.413991  |

MAC

Standard orientation:

| Center Number | Atomic Number | Atomic Type | Coordinates (Angstroms) |           |           |
|---------------|---------------|-------------|-------------------------|-----------|-----------|
|               |               |             | X                       | Y         | Z         |
| 1             | 8             | 0           | 0.444403                | 1.879960  | 1.388067  |
| 2             | 6             | 0           | -0.235979               | 2.246278  | 0.438684  |
| 3             | 7             | 0           | -0.897260               | 1.367768  | -0.389789 |
| 4             | 1             | 0           | -1.624058               | 1.771759  | -0.965822 |
| 5             | 6             | 0           | -0.366469               | 3.704218  | 0.054764  |
| 6             | 1             | 0           | -1.177922               | 3.895255  | -0.648571 |
| 7             | 1             | 0           | -0.517510               | 4.294795  | 0.959109  |
| 8             | 1             | 0           | 0.572767                | 4.027448  | -0.403489 |
| 9             | 6             | 0           | -1.053861               | -0.013503 | -0.150304 |
| 10            | 6             | 0           | -0.067254               | -0.916892 | 0.055943  |
| 11            | 1             | 0           | -0.420203               | -1.906402 | 0.321771  |
| 12            | 6             | 0           | 1.385797                | -0.808705 | -0.044440 |
| 13            | 6             | 0           | 2.155227                | -1.842540 | 0.525186  |
| 14            | 6             | 0           | 2.060066                | 0.217469  | -0.734157 |
| 15            | 6             | 0           | 3.545005                | -1.839337 | 0.437573  |
| 16            | 1             | 0           | 1.651576                | -2.651836 | 1.043045  |
| 17            | 6             | 0           | 3.447631                | 0.208072  | -0.839762 |
| 18            | 1             | 0           | 1.498364                | 1.009597  | -1.209350 |
| 19            | 6             | 0           | 4.197349                | -0.812149 | -0.247030 |
| 20            | 1             | 0           | 4.115801                | -2.639836 | 0.894006  |
| 21            | 1             | 0           | 3.947316                | 1.000937  | -1.384680 |
| 22            | 1             | 0           | 5.278585                | -0.808613 | -0.324151 |
| 23            | 6             | 0           | -2.485994               | -0.426721 | -0.181408 |
| 24            | 8             | 0           | -3.383689               | 0.352149  | -0.456416 |
| 25            | 8             | 0           | -2.690132               | -1.720368 | 0.087826  |
| 26            | 6             | 0           | -4.058491               | -2.176127 | 0.046540  |
| 27            | 1             | 0           | -4.014766               | -3.234007 | 0.293548  |
| 28            | 1             | 0           | -4.658552               | -1.635766 | 0.779089  |
| 29            | 1             | 0           | -4.473411               | -2.032000 | -0.951344 |

2

| Standard orientation: |        |        |                         |           |           |       | 2  | 6  | 0         | -0.738349 | 1.694233  | 0.297606 |
|-----------------------|--------|--------|-------------------------|-----------|-----------|-------|----|----|-----------|-----------|-----------|----------|
| -----                 |        |        |                         |           |           |       | 3  | 15 | 0         | 1.480679  | -0.148828 | 0.327762 |
| Center                | Atomic | Atomic | Coordinates (Angstroms) |           |           | 4     | 15 | 0  | -1.499592 | 0.109183  | -0.373294 |          |
| Number                | Number | Type   | X                       | Y         | Z         | 5     | 6  | 0  | 2.170845  | -0.563308 | 2.008207  |          |
| -----                 |        |        |                         |           |           |       | 6  | 1  | 0         | 3.194413  | -0.936097 | 1.942662 |
| 1                     | 6      | 0      | -0.705901               | 1.678982  | -0.309389 | 7     | 1  | 0  | 1.553104  | -1.363792 | 2.420459  |          |
| 2                     | 6      | 0      | 0.705912                | 1.678939  | 0.309606  | 8     | 6  | 0  | -2.085037 | 0.870869  | -1.966400 |          |
| 3                     | 15     | 0      | -1.455822               | -0.051568 | -0.363137 | 9     | 6  | 0  | 2.973922  | 0.235920  | -0.777435 |          |
| 4                     | 15     | 0      | 1.455822                | -0.051625 | 0.363126  | 10    | 6  | 0  | 2.479422  | 0.827554  | -2.109726 |          |
| 5                     | 6      | 0      | -2.103701               | 0.110933  | -2.105368 | 11    | 1  | 0  | 1.755138  | 0.170086  | -2.598438 |          |
| 6                     | 1      | 0      | -3.104147               | -0.313729 | -2.204681 | 12    | 1  | 0  | 2.019203  | 1.809073  | -1.974009 |          |
| 7                     | 1      | 0      | -1.436530               | -0.459480 | -2.755096 | 13    | 1  | 0  | 3.332477  | 0.957379  | -2.784252 |          |
| 8                     | 6      | 0      | 2.103686                | 0.110636  | 2.105384  | 14    | 6  | 0  | 3.725656  | -1.081994 | -1.057669 |          |
| 9                     | 6      | 0      | -2.990342               | -0.136785 | 0.744371  | 15    | 1  | 0  | 4.622361  | -0.858935 | -1.645585 |          |
| 10                    | 6      | 0      | -2.566223               | 0.022232  | 2.215317  | 16    | 1  | 0  | 4.049621  | -1.582275 | -0.140916 |          |
| 11                    | 1      | 0      | -1.804689               | -0.710647 | 2.494853  | 17    | 1  | 0  | 3.116501  | -1.780548 | -1.635001 |          |
| 12                    | 1      | 0      | -2.175751               | 1.022208  | 2.421778  | 18    | 6  | 0  | 3.938316  | 1.228152  | -0.097077 |          |
| 13                    | 1      | 0      | -3.438597               | -0.127323 | 2.861003  | 19    | 1  | 0  | 4.357440  | 0.831644  | 0.830548  |          |
| 14                    | 6      | 0      | -3.615778               | -1.534229 | 0.544932  | 20    | 1  | 0  | 4.775864  | 1.420019  | -0.776551 |          |
| 15                    | 1      | 0      | -4.508547               | -1.620944 | 1.173943  | 21    | 1  | 0  | 3.469493  | 2.191423  | 0.117328  |          |
| 16                    | 1      | 0      | -3.924523               | -1.707167 | -0.489901 | 22    | 6  | 0  | -3.050653 | -0.351615 | 0.603688  |          |
| 17                    | 1      | 0      | -2.925642               | -2.331621 | 0.836031  | 23    | 6  | 0  | -2.647651 | -0.701113 | 2.048645  |          |
| 18                    | 6      | 0      | -4.027087               | 0.945283  | 0.387650  | 24    | 1  | 0  | -1.877781 | -1.477492 | 2.075808  |          |
| 19                    | 1      | 0      | -4.400062               | 0.844785  | -0.634183 | 25    | 1  | 0  | -2.278314 | 0.172263  | 2.592710  |          |
| 20                    | 1      | 0      | -4.887362               | 0.843639  | 1.058746  | 26    | 1  | 0  | -3.526473 | -1.072741 | 2.586676  |          |
| 21                    | 1      | 0      | -3.633948               | 1.957309  | 0.515443  | 27    | 6  | 0  | -3.644747 | -1.604857 | -0.075115 |          |
| 22                    | 6      | 0      | 2.990348                | -0.136690 | -0.744390 | 28    | 1  | 0  | -4.540749 | -1.918379 | 0.471268  |          |
| 23                    | 6      | 0      | 2.566224                | 0.022459  | -2.215319 | 29    | 1  | 0  | -3.940083 | -1.415462 | -1.110976 |          |
| 24                    | 1      | 0      | 1.804723                | -0.710424 | -2.494934 | 30    | 1  | 0  | -2.938431 | -2.440368 | -0.065534 |          |
| 25                    | 1      | 0      | 2.175709                | 1.022439  | -2.421677 | 31    | 6  | 0  | -4.097571 | 0.776303  | 0.618004  |          |
| 26                    | 1      | 0      | 3.438606                | -0.126992 | -2.861019 | 32    | 1  | 0  | -4.453955 | 1.026270  | -0.383983 |          |
| 27                    | 6      | 0      | 3.615828                | -1.534132 | -0.545081 | 33    | 1  | 0  | -4.965477 | 0.444519  | 1.198959  |          |
| 28                    | 1      | 0      | 4.508610                | -1.620756 | -1.174086 | 34    | 1  | 0  | -3.719898 | 1.687380  | 1.089517  |          |
| 29                    | 1      | 0      | 3.924564                | -1.707159 | 0.489740  | 35    | 1  | 0  | -3.071213 | 0.499028  | -2.249746 |          |
| 30                    | 1      | 0      | 2.925725                | -2.331521 | -0.836267 | 36    | 1  | 0  | -1.383560 | 0.575765  | -2.750191 |          |
| 31                    | 6      | 0      | 4.027053                | 0.945379  | -0.387560 | 37    | 45 | 0  | 0.022827  | -1.598282 | -0.483793 |          |
| 32                    | 1      | 0      | 4.400026                | 0.844799  | 0.634266  | 38    | 1  | 0  | 1.251516  | -2.855047 | -0.841410 |          |
| 33                    | 1      | 0      | 4.887336                | 0.843827  | -1.058659 | 39    | 1  | 0  | 1.065814  | -2.974044 | -0.054221 |          |
| 34                    | 1      | 0      | 3.633880                | 1.957403  | -0.515262 | 40    | 1  | 0  | -1.392808 | 2.066280  | 1.091216  |          |
| 35                    | 1      | 0      | 3.104125                | -0.314053 | 2.204653  | 41    | 6  | 0  | 0.720457  | 1.398600  | 2.428447  |          |
| 36                    | 1      | 0      | 1.436498                | -0.459855 | 2.755027  | 42    | 1  | 0  | 0.620247  | 2.401147  | 2.854575  |          |
| 37                    | 45     | 0      | -0.000007               | -1.651889 | -0.000110 | 43    | 1  | 0  | -0.124376 | 0.807205  | 2.795506  |          |
| 38                    | 6      | 0      | 0.768322                | 2.173297  | 1.775139  | 44    | 6  | 0  | 2.030371  | 0.720377  | 2.851055  |          |
| 39                    | 1      | 0      | 0.735986                | 3.266342  | 1.808541  | 45    | 1  | 0  | 2.032201  | 0.485910  | 3.919054  |          |
| 40                    | 1      | 0      | -0.108701               | 1.810973  | 2.320317  | 46    | 1  | 0  | 2.875245  | 1.389812  | 2.664779  |          |
| 41                    | 6      | 0      | -0.768305               | 2.173529  | -1.774858 | 47    | 6  | 0  | -0.793086 | 2.690497  | -0.888734 |          |
| 42                    | 1      | 0      | -0.735945               | 3.266577  | -1.808123 | 48    | 1  | 0  | -0.783690 | 3.719683  | -0.518349 |          |
| 43                    | 1      | 0      | 0.108707                | 1.811251  | -2.320086 | 49    | 1  | 0  | 0.098140  | 2.567763  | -1.510787 |          |
| 44                    | 6      | 0      | -2.035501               | 1.615866  | -2.437866 | 50    | 6  | 0  | -2.038115 | 2.396075  | -1.736542 |          |
| 45                    | 1      | 0      | -2.021956               | 1.776279  | -3.519665 | 51    | 1  | 0  | -2.007485 | 2.932862  | -2.688873 |          |
| 46                    | 1      | 0      | -2.918970               | 2.128879  | -2.046470 | 52    | 1  | 0  | -2.938254 | 2.724574  | -1.209022 |          |
| 47                    | 1      | 0      | -1.363804               | 2.308062  | 0.297421  | 53    | 1  | 0  | 1.321562  | 2.285634  | 0.558584  |          |
| 48                    | 6      | 0      | 2.035502                | 1.615525  | 2.438084  | ----- |    |    |           |           |           |          |
| 49                    | 1      | 0      | 2.021948                | 1.775792  | 3.519905  | ----- |    |    |           |           |           |          |
| 50                    | 1      | 0      | 2.918985                | 2.128578  | 2.046769  | ----- |    |    |           |           |           |          |
| 51                    | 1      | 0      | 1.363819                | 2.308090  | -0.297126 | ----- |    |    |           |           |           |          |

TS1

Standard orientation:

| -----  |        |      |           |           |           |        | Center | Atomic | Atomic    | Coordinates (Angstroms) |           |          |
|--------|--------|------|-----------|-----------|-----------|--------|--------|--------|-----------|-------------------------|-----------|----------|
| Number | Number | Type | X         | Y         | Z         | Number | Number | Type   | X         | Y                       | Z         |          |
| -----  |        |      |           |           |           |        | 1      | 6      | 0         | 0.618087                | 1.321289  | 1.084837 |
| 2      | 6      | 0    | -0.781908 | 1.604926  | 0.503492  | 2      | 6      | 0      | -0.781908 | 1.604926                | 0.503492  |          |
| 3      | 15     | 0    | 1.534345  | -0.160783 | 0.345243  | 3      | 15     | 0      | 1.534345  | -0.160783               | 0.345243  |          |
| 4      | 15     | 0    | -1.541023 | 0.137953  | -0.406932 | 4      | 15     | 0      | -1.541023 | 0.137953                | -0.406932 |          |
| 5      | 6      | 0    | 2.344015  | -0.660131 | 1.945536  | 5      | 6      | 0      | 2.344015  | -0.660131               | 1.945536  |          |

4

Standard orientation:

| -----  |        |      |          |          |          |        | Center | Atomic | Atomic | Coordinates (Angstroms) |          |          |
|--------|--------|------|----------|----------|----------|--------|--------|--------|--------|-------------------------|----------|----------|
| Number | Number | Type | X        | Y        | Z        | Number | Number | Type   | X      | Y                       | Z        |          |
| -----  |        |      |          |          |          |        | 1      | 6      | 0      | 0.671003                | 1.468775 | 0.883355 |
| 1      | 6      | 0    | 0.671003 | 1.468775 | 0.883355 | -----  |        |        |        |                         |          |          |

|    |    |   |           |           |           |    |    |   |           |           |           |
|----|----|---|-----------|-----------|-----------|----|----|---|-----------|-----------|-----------|
| 6  | 1  | 0 | 3.414123  | -0.814386 | 1.806831  | 10 | 6  | 0 | -2.776965 | -0.867204 | 1.950374  |
| 7  | 1  | 0 | 1.909076  | -1.609482 | 2.258735  | 11 | 1  | 0 | -2.033313 | -1.668121 | 1.936389  |
| 8  | 6  | 0 | -2.125393 | 1.151141  | -1.855636 | 12 | 1  | 0 | -2.389958 | -0.045564 | 2.558701  |
| 9  | 6  | 0 | 2.926937  | 0.383936  | -0.823680 | 13 | 1  | 0 | -3.672823 | -1.249014 | 2.451864  |
| 10 | 6  | 0 | 2.320924  | 0.872577  | -2.152613 | 14 | 6  | 0 | -3.758936 | -1.595180 | -0.245257 |
| 11 | 1  | 0 | 1.770169  | 0.077270  | -2.661853 | 15 | 1  | 0 | -4.661981 | -1.940301 | 0.269853  |
| 12 | 1  | 0 | 1.647454  | 1.721326  | -2.018046 | 16 | 1  | 0 | -4.045823 | -1.320750 | -1.264682 |
| 13 | 1  | 0 | 3.128557  | 1.197943  | -2.816984 | 17 | 1  | 0 | -3.061162 | -2.436035 | -0.300523 |
| 14 | 6  | 0 | 3.818684  | -0.844052 | -1.107083 | 18 | 6  | 0 | -4.184290 | 0.732724  | 0.622516  |
| 15 | 1  | 0 | 4.591162  | -0.557925 | -1.828420 | 19 | 1  | 0 | -4.526208 | 1.064495  | -0.360519 |
| 16 | 1  | 0 | 4.326609  | -1.208330 | -0.211174 | 20 | 1  | 0 | -5.063262 | 0.371747  | 1.168599  |
| 17 | 1  | 0 | 3.241585  | -1.666970 | -1.535185 | 21 | 1  | 0 | -3.798209 | 1.599294  | 1.165962  |
| 18 | 6  | 0 | 3.773850  | 1.502163  | -0.186902 | 22 | 6  | 0 | 2.990500  | 0.363805  | -0.761671 |
| 19 | 1  | 0 | 4.215705  | 1.206477  | 0.768775  | 23 | 6  | 0 | 2.446254  | 0.884968  | -2.105193 |
| 20 | 1  | 0 | 4.600998  | 1.739545  | -0.864942 | 24 | 1  | 0 | 1.883608  | 0.120763  | -2.647879 |
| 21 | 1  | 0 | 3.203817  | 2.421868  | -0.036990 | 25 | 1  | 0 | 1.808017  | 1.762334  | -1.982402 |
| 22 | 6  | 0 | -3.102656 | -0.441427 | 0.495054  | 26 | 1  | 0 | 3.290235  | 1.182579  | -2.736250 |
| 23 | 6  | 0 | -2.721781 | -0.961938 | 1.891896  | 27 | 6  | 0 | 3.896825  | -0.856982 | -1.024612 |
| 24 | 1  | 0 | -1.936721 | -1.720788 | 1.842517  | 28 | 1  | 0 | 4.717758  | -0.546149 | -1.679108 |
| 25 | 1  | 0 | -2.386563 | -0.154274 | 2.547367  | 29 | 1  | 0 | 4.340450  | -1.251741 | -0.107057 |
| 26 | 1  | 0 | -3.603211 | -1.414583 | 2.358457  | 30 | 1  | 0 | 3.352479  | -1.664780 | -1.516929 |
| 27 | 6  | 0 | -3.682988 | -1.601217 | -0.343522 | 31 | 6  | 0 | 3.814838  | 1.469339  | -0.071034 |
| 28 | 1  | 0 | -4.588738 | -1.980572 | 0.142065  | 32 | 1  | 0 | 4.236057  | 1.143242  | 0.883161  |
| 29 | 1  | 0 | -3.960149 | -1.281935 | -1.353014 | 33 | 1  | 0 | 4.654641  | 1.731670  | -0.723385 |
| 30 | 1  | 0 | -2.976478 | -2.432405 | -0.430146 | 34 | 1  | 0 | 3.238055  | 2.381481  | 0.096284  |
| 31 | 6  | 0 | -4.160277 | 0.669569  | 0.637007  | 35 | 1  | 0 | 3.337780  | -0.927932 | 1.877662  |
| 32 | 1  | 0 | -4.510314 | 1.037219  | -0.330259 | 36 | 1  | 0 | 1.765661  | -1.602048 | 2.292166  |
| 33 | 1  | 0 | -5.029850 | 0.263255  | 1.165575  | 37 | 45 | 0 | 0.161039  | -1.574533 | -0.648516 |
| 34 | 1  | 0 | -3.795792 | 1.519944  | 1.219822  | 38 | 1  | 0 | -0.079557 | -2.086750 | 0.752912  |
| 35 | 1  | 0 | -3.112440 | 0.834979  | -2.197128 | 39 | 1  | 0 | 1.373742  | -2.626647 | -0.634905 |
| 36 | 1  | 0 | -1.426650 | 0.980689  | -2.678844 | 40 | 6  | 0 | 0.628649  | 1.060167  | 2.566778  |
| 37 | 45 | 0 | 0.142722  | -1.598256 | -0.610689 | 41 | 1  | 0 | 0.421349  | 1.992320  | 3.100337  |
| 38 | 1  | 0 | 1.292347  | -2.731231 | -0.602931 | 42 | 1  | 0 | -0.162861 | 0.352357  | 2.833091  |
| 39 | 1  | 0 | 0.555918  | -2.610487 | 0.483240  | 43 | 6  | 0 | -0.811999 | 2.705535  | -0.617593 |
| 40 | 1  | 0 | -1.453739 | 1.852963  | 1.330913  | 44 | 1  | 0 | -0.774626 | 3.685153  | -0.131734 |
| 41 | 6  | 0 | 0.638354  | 1.018930  | 2.601830  | 45 | 1  | 0 | 0.078248  | 2.631472  | -1.249601 |
| 42 | 1  | 0 | 0.403171  | 1.925817  | 3.166714  | 46 | 6  | 0 | 1.991261  | 0.469221  | 2.949790  |
| 43 | 1  | 0 | -0.129850 | 0.276935  | 2.844470  | 47 | 1  | 0 | 1.999638  | 0.116005  | 3.984083  |
| 44 | 6  | 0 | 2.021139  | 0.460423  | 2.956346  | 48 | 1  | 0 | 2.766897  | 1.236124  | 2.863345  |
| 45 | 1  | 0 | 2.050752  | 0.076654  | 3.979367  | 49 | 1  | 0 | 1.243461  | 2.187231  | 0.847435  |
| 46 | 1  | 0 | 2.769832  | 1.256170  | 2.888869  | 50 | 6  | 0 | -2.059746 | 2.544229  | -1.494045 |
| 47 | 6  | 0 | -0.823400 | 2.772214  | -0.511260 | 51 | 1  | 0 | -2.011025 | 3.186108  | -2.378567 |
| 48 | 1  | 0 | -0.806353 | 3.732255  | 0.012985  | 52 | 1  | 0 | -2.952827 | 2.833629  | -0.933145 |
| 49 | 1  | 0 | 0.069111  | 2.743838  | -1.144882 | 53 | 1  | 0 | -1.446768 | 1.872904  | 1.268577  |
| 50 | 6  | 0 | -2.070425 | 2.621113  | -1.393605 |    |    |   |           |           |           |
| 51 | 1  | 0 | -2.039594 | 3.298911  | -2.251533 |    |    |   |           |           |           |
| 52 | 1  | 0 | -2.966490 | 2.868049  | -0.817472 |    |    |   |           |           |           |
| 53 | 1  | 0 | 1.251260  | 2.198113  | 0.919264  |    |    |   |           |           |           |

3

Standard orientation:

5

Standard orientation:

| Center Number | Atomic Number | Atomic Type | Coordinates (Angstroms) |           |           |
|---------------|---------------|-------------|-------------------------|-----------|-----------|
|               |               |             | X                       | Y         | Z         |
| 1             | 6             | 0           | -0.787180               | 1.578621  | 0.446727  |
| 2             | 6             | 0           | 0.615453                | 1.312160  | 1.040277  |
| 3             | 15            | 0           | -1.581117               | 0.088737  | -0.402011 |
| 4             | 15            | 0           | 1.552955                | -0.180704 | 0.346780  |
| 5             | 6             | 0           | -2.142602               | 1.057204  | -1.891429 |
| 6             | 1             | 0           | -3.134583               | 0.746862  | -2.224402 |
| 7             | 1             | 0           | -1.442538               | 0.837528  | -2.702286 |
| 8             | 6             | 0           | 2.277716                | -0.692287 | 1.976753  |
| 9             | 6             | 0           | -3.152257               | -0.405643 | 0.530059  |

| Center Number | Atomic Number | Atomic Type | Coordinates (Angstroms) |           |           |
|---------------|---------------|-------------|-------------------------|-----------|-----------|
|               |               |             | X                       | Y         | Z         |
| 1             | 8             | 0           | -1.598114               | 1.968174  | 1.501164  |
| 2             | 6             | 0           | -1.160817               | 2.042893  | 0.350877  |
| 3             | 7             | 0           | -0.688213               | 0.953903  | -0.306415 |
| 4             | 6             | 0           | -0.692154               | -0.368664 | 0.281874  |
| 5             | 6             | 0           | 0.346463                | -1.289872 | -0.404174 |
| 6             | 1             | 0           | 0.102574                | -1.376424 | -1.467389 |
| 7             | 1             | 0           | -0.417729               | 1.053289  | -1.272781 |
| 8             | 6             | 0           | 1.774333                | -0.814322 | -0.237144 |
| 9             | 6             | 0           | 2.495872                | -0.308717 | -1.324435 |
| 10            | 6             | 0           | 2.405490                | -0.879592 | 1.013106  |
| 11            | 6             | 0           | 3.813643                | 0.129187  | -1.169131 |
| 12            | 1             | 0           | 2.028335                | -0.262505 | -2.302749 |
| 13            | 6             | 0           | 3.720108                | -0.442532 | 1.173049  |

|    |   |   |           |           |           |
|----|---|---|-----------|-----------|-----------|
| 14 | 1 | 0 | 1.868162  | -1.279712 | 1.867153  |
| 15 | 6 | 0 | 4.429038  | 0.065621  | 0.081158  |
| 16 | 1 | 0 | 4.355973  | 0.516164  | -2.024569 |
| 17 | 1 | 0 | 4.192401  | -0.503159 | 2.147206  |
| 18 | 1 | 0 | 5.451698  | 0.403567  | 0.204590  |
| 19 | 6 | 0 | -1.114327 | 3.353672  | -0.402830 |
| 20 | 1 | 0 | -2.132241 | 3.738337  | -0.499396 |
| 21 | 1 | 0 | -0.541255 | 4.074750  | 0.183950  |
| 22 | 1 | 0 | -0.670093 | 3.266214  | -1.395148 |
| 23 | 6 | 0 | -2.060792 | -1.058853 | 0.266769  |
| 24 | 8 | 0 | -2.344203 | -1.954007 | 1.035108  |
| 25 | 8 | 0 | -2.871328 | -0.607442 | -0.689877 |
| 26 | 6 | 0 | -4.167356 | -1.239542 | -0.789626 |
| 27 | 1 | 0 | -4.669794 | -0.736356 | -1.611864 |
| 28 | 1 | 0 | -4.050368 | -2.302367 | -1.002061 |
| 29 | 1 | 0 | -4.721091 | -1.105030 | 0.139653  |
| 30 | 1 | 0 | 0.230710  | -2.285208 | 0.032142  |
| 31 | 1 | 0 | -0.437631 | -0.268349 | 1.338054  |

6

Standard orientation:

| Center Number | Atomic Number | Atomic Type | Coordinates (Angstroms) |           |           |
|---------------|---------------|-------------|-------------------------|-----------|-----------|
|               |               |             | X                       | Y         | Z         |
| 1             | 6             | 0           | 3.990403                | -1.127851 | 0.258125  |
| 2             | 6             | 0           | 4.401975                | 0.355152  | 0.181400  |
| 3             | 15            | 0           | 2.184822                | -1.414631 | -0.232618 |
| 4             | 15            | 0           | 2.899790                | 1.492730  | 0.129154  |
| 5             | 6             | 0           | 1.849229                | -2.635408 | 1.140990  |
| 6             | 1             | 0           | 1.278169                | -3.494403 | 0.783857  |
| 7             | 1             | 0           | 1.242571                | -2.125568 | 1.891762  |
| 8             | 6             | 0           | 3.571603                | 2.565231  | -1.244724 |
| 9             | 6             | 0           | 2.133820                | -2.439047 | -1.831728 |
| 10            | 6             | 0           | 2.657260                | -1.580697 | -2.997446 |
| 11            | 1             | 0           | 2.116389                | -0.633523 | -3.074196 |
| 12            | 1             | 0           | 3.722749                | -1.360315 | -2.894361 |
| 13            | 1             | 0           | 2.526855                | -2.128150 | -3.937499 |
| 14            | 6             | 0           | 0.663898                | -2.819482 | -2.103541 |
| 15            | 1             | 0           | 0.613080                | -3.405165 | -3.028185 |
| 16            | 1             | 0           | 0.242064                | -3.433531 | -1.302663 |
| 17            | 1             | 0           | 0.031921                | -1.937500 | -2.222332 |
| 18            | 6             | 0           | 2.975720                | -3.725709 | -1.724863 |
| 19            | 1             | 0           | 2.612799                | -4.396276 | -0.942472 |
| 20            | 1             | 0           | 2.907698                | -4.268341 | -2.674487 |
| 21            | 1             | 0           | 4.034203                | -3.522553 | -1.543827 |
| 22            | 6             | 0           | 2.883045                | 2.605102  | 1.665009  |
| 23            | 6             | 0           | 2.651538                | 1.737663  | 2.916117  |
| 24            | 1             | 0           | 1.750637                | 1.125466  | 2.821842  |
| 25            | 1             | 0           | 3.498749                | 1.075945  | 3.115782  |
| 26            | 1             | 0           | 2.532812                | 2.387412  | 3.790473  |
| 27            | 6             | 0           | 1.697824                | 3.580387  | 1.497108  |
| 28            | 1             | 0           | 1.636113                | 4.230307  | 2.377076  |
| 29            | 1             | 0           | 1.813286                | 4.223946  | 0.620192  |
| 30            | 1             | 0           | 0.745976                | 3.048112  | 1.407995  |
| 31            | 6             | 0           | 4.186364                | 3.406366  | 1.835141  |
| 32            | 1             | 0           | 4.374089                | 4.079644  | 0.995545  |
| 33            | 1             | 0           | 4.107716                | 4.024447  | 2.736865  |
| 34            | 1             | 0           | 5.058345                | 2.759067  | 1.961345  |
| 35            | 1             | 0           | 3.368894                | 3.623240  | -1.068777 |
| 36            | 1             | 0           | 3.052496                | 2.278370  | -2.162436 |
| 37            | 45            | 0           | 0.984827                | 0.426000  | -0.244868 |
| 38            | 8             | 0           | -1.026638               | -0.266846 | -0.702798 |
| 39            | 6             | 0           | -2.003144               | -0.498761 | 0.039797  |

|    |   |   |           |           |           |
|----|---|---|-----------|-----------|-----------|
| 40 | 7 | 0 | -3.229994 | -0.545363 | -0.521870 |
| 41 | 6 | 0 | -1.866656 | -0.709358 | 1.520613  |
| 42 | 1 | 0 | -0.934446 | -0.254673 | 1.854401  |
| 43 | 1 | 0 | -2.710763 | -0.287381 | 2.068837  |
| 44 | 1 | 0 | -1.829902 | -1.782583 | 1.726258  |
| 45 | 6 | 0 | -4.458034 | -0.884772 | 0.105485  |
| 46 | 6 | 0 | -5.527315 | -0.053871 | 0.134556  |
| 47 | 1 | 0 | -6.428671 | -0.495507 | 0.544239  |
| 48 | 6 | 0 | -5.693099 | 1.324523  | -0.321046 |
| 49 | 6 | 0 | -7.012233 | 1.826666  | -0.348573 |
| 50 | 6 | 0 | -4.645450 | 2.187599  | -0.708868 |
| 51 | 6 | 0 | -7.280973 | 3.127881  | -0.764625 |
| 52 | 1 | 0 | -7.828993 | 1.181386  | -0.042779 |
| 53 | 6 | 0 | -4.916724 | 3.491660  | -1.115082 |
| 54 | 1 | 0 | -3.618952 | 1.852721  | -0.678811 |
| 55 | 6 | 0 | -6.231886 | 3.965945  | -1.150944 |
| 56 | 1 | 0 | -8.303383 | 3.488124  | -0.783101 |
| 57 | 1 | 0 | -4.098001 | 4.141391  | -1.403653 |
| 58 | 1 | 0 | -6.435140 | 4.981414  | -1.472459 |
| 59 | 6 | 0 | -4.551725 | -2.290937 | 0.597141  |
| 60 | 8 | 0 | -3.685737 | -3.123518 | 0.403137  |
| 61 | 8 | 0 | -5.678961 | -2.539182 | 1.273424  |
| 62 | 6 | 0 | -5.857047 | -3.888066 | 1.752685  |
| 63 | 1 | 0 | -6.816877 | -3.885591 | 2.264337  |
| 64 | 1 | 0 | -5.870344 | -4.587488 | 0.915703  |
| 65 | 1 | 0 | -5.054728 | -4.151122 | 2.443182  |
| 66 | 6 | 0 | 5.227447  | 0.730527  | -1.073678 |
| 67 | 1 | 0 | 6.274709  | 0.442407  | -0.941233 |
| 68 | 1 | 0 | 4.851089  | 0.173630  | -1.937049 |
| 69 | 6 | 0 | 5.074594  | 2.233535  | -1.344810 |
| 70 | 1 | 0 | 5.471700  | 2.502458  | -2.328091 |
| 71 | 1 | 0 | 5.637638  | 2.806864  | -0.602730 |
| 72 | 6 | 0 | 4.104240  | -1.753808 | 1.668008  |
| 73 | 1 | 0 | 5.150135  | -1.972079 | 1.904418  |
| 74 | 1 | 0 | 3.749350  | -1.036951 | 2.415471  |
| 75 | 6 | 0 | 3.227100  | -3.011495 | 1.723620  |
| 76 | 1 | 0 | 3.129307  | -3.384741 | 2.747166  |
| 77 | 1 | 0 | 3.682943  | -3.810468 | 1.131588  |
| 78 | 1 | 0 | 4.988595  | 0.608432  | 1.069488  |
| 79 | 1 | 0 | 4.615568  | -1.708286 | -0.426654 |
| 80 | 1 | 0 | -3.244835 | -0.374016 | -1.521198 |

7

Standard orientation:

| Center Number | Atomic Number | Atomic Type | Coordinates (Angstroms) |           |           |
|---------------|---------------|-------------|-------------------------|-----------|-----------|
|               |               |             | X                       | Y         | Z         |
| 1             | 6             | 0           | -3.028438               | -1.998372 | 0.464031  |
| 2             | 6             | 0           | -3.799091               | -0.687934 | 0.717131  |
| 3             | 15            | 0           | -1.183658               | -1.744199 | 0.145531  |
| 4             | 15            | 0           | -2.890062               | 0.856770  | 0.114162  |
| 5             | 6             | 0           | -1.109179               | -2.956139 | -1.270008 |
| 6             | 1             | 0           | -0.210894               | -3.573668 | -1.221448 |
| 7             | 1             | 0           | -1.062110               | -2.378658 | -2.195902 |
| 8             | 6             | 0           | -3.295563               | 1.865320  | 1.631502  |
| 9             | 6             | 0           | -0.192695               | -2.534170 | 1.557060  |
| 10            | 6             | 0           | -0.370878               | -1.679660 | 2.825936  |
| 11            | 1             | 0           | -0.109030               | -0.633250 | 2.645492  |
| 12            | 1             | 0           | -1.395002               | -1.718110 | 3.205517  |
| 13            | 1             | 0           | 0.283858                | -2.064924 | 3.615249  |
| 14            | 6             | 0           | 1.296179                | -2.529310 | 1.154087  |
| 15            | 1             | 0           | 1.882041                | -2.971471 | 1.967562  |
| 16            | 1             | 0           | 1.482296                | -3.124879 | 0.256037  |

|                       |        |        |                         |           |           |       |   |   |           |           |          |
|-----------------------|--------|--------|-------------------------|-----------|-----------|-------|---|---|-----------|-----------|----------|
| 17                    | 1      | 0      | 1.667080                | -1.519020 | 0.976382  | 82    | 1 | 0 | -3.124883 | -2.633884 | 1.348738 |
| 18                    | 6      | 0      | -0.629881               | -3.983199 | 1.843242  | ----- |   |   |           |           |          |
| 19                    | 1      | 0      | -0.473206               | -4.639606 | 0.983819  | ----- |   |   |           |           |          |
| 20                    | 1      | 0      | -0.022410               | -4.376024 | 2.666329  | ----- |   |   |           |           |          |
| 21                    | 1      | 0      | -1.675957               | -4.056464 | 2.150263  | ----- |   |   |           |           |          |
| 22                    | 6      | 0      | -3.893168               | 1.643486  | -1.295931 | ----- |   |   |           |           |          |
| 23                    | 6      | 0      | -3.828437               | 0.727649  | -2.531874 | ----- |   |   |           |           |          |
| 24                    | 1      | 0      | -2.795464               | 0.509574  | -2.816396 | ----- |   |   |           |           |          |
| 25                    | 1      | 0      | -4.349386               | -0.218560 | -2.366764 | ----- |   |   |           |           |          |
| 26                    | 1      | 0      | -4.317145               | 1.225228  | -3.376777 | ----- |   |   |           |           |          |
| 27                    | 6      | 0      | -3.257867               | 3.004646  | -1.648536 | ----- |   |   |           |           |          |
| 28                    | 1      | 0      | -3.864984               | 3.489420  | -2.420616 | ----- |   |   |           |           |          |
| 29                    | 1      | 0      | -3.215230               | 3.682377  | -0.791409 | ----- |   |   |           |           |          |
| 30                    | 1      | 0      | -2.247944               | 2.889921  | -2.047194 | ----- |   |   |           |           |          |
| 31                    | 6      | 0      | -5.365636               | 1.871420  | -0.901642 | ----- |   |   |           |           |          |
| 32                    | 1      | 0      | -5.469536               | 2.568298  | -0.066499 | ----- |   |   |           |           |          |
| 33                    | 1      | 0      | -5.893767               | 2.307983  | -1.756620 | ----- |   |   |           |           |          |
| 34                    | 1      | 0      | -5.880977               | 0.943102  | -0.644128 | ----- |   |   |           |           |          |
| 35                    | 1      | 0      | -3.575471               | 2.888293  | 1.373607  | ----- |   |   |           |           |          |
| 36                    | 1      | 0      | -2.387388               | 1.916065  | 2.236614  | ----- |   |   |           |           |          |
| 37                    | 45     | 0      | -0.715686               | 0.477919  | -0.307679 | ----- |   |   |           |           |          |
| 38                    | 8      | 0      | 1.433211                | 0.227348  | -0.680426 | ----- |   |   |           |           |          |
| 39                    | 6      | 0      | 2.069929                | 0.117777  | -1.738915 | ----- |   |   |           |           |          |
| 40                    | 7      | 0      | 3.426420                | 0.057222  | -1.734587 | ----- |   |   |           |           |          |
| 41                    | 1      | 0      | 3.856975                | -0.249637 | -2.596799 | ----- |   |   |           |           |          |
| 42                    | 6      | 0      | 1.410994                | 0.098408  | -3.091549 | ----- |   |   |           |           |          |
| 43                    | 1      | 0      | 2.067605                | -0.285363 | -3.873266 | ----- |   |   |           |           |          |
| 44                    | 1      | 0      | 0.501624                | -0.500468 | -3.038676 | ----- |   |   |           |           |          |
| 45                    | 1      | 0      | 1.121208                | 1.121665  | -3.350414 | ----- |   |   |           |           |          |
| 46                    | 6      | 0      | 4.247707                | -0.053208 | -0.585628 | ----- |   |   |           |           |          |
| 47                    | 6      | 0      | 4.295079                | 0.815382  | 0.450802  | ----- |   |   |           |           |          |
| 48                    | 1      | 0      | 4.924860                | 0.491773  | 1.271911  | ----- |   |   |           |           |          |
| 49                    | 6      | 0      | 3.665018                | 2.118278  | 0.653686  | ----- |   |   |           |           |          |
| 50                    | 6      | 0      | 3.623702                | 2.621861  | 1.969703  | ----- |   |   |           |           |          |
| 51                    | 6      | 0      | 3.167867                | 2.928782  | -0.386419 | ----- |   |   |           |           |          |
| 52                    | 6      | 0      | 3.077233                | 3.874061  | 2.244206  | ----- |   |   |           |           |          |
| 53                    | 1      | 0      | 4.023715                | 2.020201  | 2.779406  | ----- |   |   |           |           |          |
| 54                    | 6      | 0      | 2.642061                | 4.188687  | -0.113222 | ----- |   |   |           |           |          |
| 55                    | 1      | 0      | 3.218997                | 2.588511  | -1.412131 | ----- |   |   |           |           |          |
| 56                    | 6      | 0      | 2.584435                | 4.663014  | 1.201754  | ----- |   |   |           |           |          |
| 57                    | 1      | 0      | 3.046288                | 4.237029  | 3.265508  | ----- |   |   |           |           |          |
| 58                    | 1      | 0      | 2.277141                | 4.804057  | -0.928227 | ----- |   |   |           |           |          |
| 59                    | 1      | 0      | 2.167697                | 5.642527  | 1.408936  | ----- |   |   |           |           |          |
| 60                    | 6      | 0      | 5.132023                | -1.251506 | -0.645009 | ----- |   |   |           |           |          |
| 61                    | 8      | 0      | 5.169920                | -1.984218 | -1.618801 | ----- |   |   |           |           |          |
| 62                    | 8      | 0      | 5.886292                | -1.424980 | 0.442895  | ----- |   |   |           |           |          |
| 63                    | 6      | 0      | 6.785538                | -2.553441 | 0.429509  | ----- |   |   |           |           |          |
| 64                    | 1      | 0      | 7.293657                | -2.525358 | 1.390739  | ----- |   |   |           |           |          |
| 65                    | 1      | 0      | 6.224210                | -3.482033 | 0.318825  | ----- |   |   |           |           |          |
| 66                    | 1      | 0      | 7.502337                | -2.453386 | -0.386577 | ----- |   |   |           |           |          |
| 67                    | 1      | 0      | -0.378897               | 2.192840  | -0.145894 | ----- |   |   |           |           |          |
| 68                    | 1      | 0      | -0.494655               | 2.101967  | -0.958017 | ----- |   |   |           |           |          |
| 69                    | 6      | 0      | -4.097936               | -0.401548 | 2.209127  | ----- |   |   |           |           |          |
| 70                    | 1      | 0      | -4.922604               | -1.030688 | 2.557505  | ----- |   |   |           |           |          |
| 71                    | 1      | 0      | -3.222721               | -0.657770 | 2.814467  | ----- |   |   |           |           |          |
| 72                    | 6      | 0      | -3.525028               | -2.801623 | -0.762581 | ----- |   |   |           |           |          |
| 73                    | 1      | 0      | -4.455743               | -3.324039 | -0.521774 | ----- |   |   |           |           |          |
| 74                    | 1      | 0      | -3.747509               | -2.112828 | -1.583303 | ----- |   |   |           |           |          |
| 75                    | 6      | 0      | -4.401092               | 1.092306  | 2.377072  | ----- |   |   |           |           |          |
| 76                    | 1      | 0      | -4.434072               | 1.377089  | 3.432626  | ----- |   |   |           |           |          |
| 77                    | 1      | 0      | -5.380100               | 1.325201  | 1.948979  | ----- |   |   |           |           |          |
| 78                    | 6      | 0      | -2.419528               | -3.766822 | -1.206600 | ----- |   |   |           |           |          |
| 79                    | 1      | 0      | -2.322967               | -4.583829 | -0.485789 | ----- |   |   |           |           |          |
| 80                    | 1      | 0      | -2.647199               | -4.217047 | -2.177034 | ----- |   |   |           |           |          |
| 81                    | 1      | 0      | -4.753065               | -0.737690 | 0.184451  | ----- |   |   |           |           |          |
| TS2                   |        |        |                         |           |           |       |   |   |           |           |          |
| Standard orientation: |        |        |                         |           |           |       |   |   |           |           |          |
| -----                 |        |        |                         |           |           |       |   |   |           |           |          |
| Center                | Atomic | Atomic | Coordinates (Angstroms) |           |           |       |   |   |           |           |          |
| Number                | Number | Type   | X                       | Y         | Z         |       |   |   |           |           |          |
| -----                 |        |        |                         |           |           |       |   |   |           |           |          |
| 1                     | 6      | 0      | -3.072058               | -1.949073 | 0.502841  |       |   |   |           |           |          |
| 2                     | 6      | 0      | -3.800621               | -0.607575 | 0.730434  |       |   |   |           |           |          |
| 3                     | 15     | 0      | -1.219269               | -1.784480 | 0.170642  |       |   |   |           |           |          |
| 4                     | 15     | 0      | -2.887601               | 0.926851  | 0.096309  |       |   |   |           |           |          |
| 5                     | 6      | 0      | -1.219230               | -3.011626 | -1.235200 |       |   |   |           |           |          |
| 6                     | 1      | 0      | -0.342208               | -3.660370 | -1.200922 |       |   |   |           |           |          |
| 7                     | 1      | 0      | -1.167555               | -2.442982 | -2.167048 |       |   |   |           |           |          |
| 8                     | 6      | 0      | -3.332369               | 1.981143  | 1.566422  |       |   |   |           |           |          |
| 9                     | 6      | 0      | -0.264553               | -2.616961 | 1.582651  |       |   |   |           |           |          |
| 10                    | 6      | 0      | -0.454430               | -1.788742 | 2.866982  |       |   |   |           |           |          |
| 11                    | 1      | 0      | -0.179405               | -0.741016 | 2.719334  |       |   |   |           |           |          |
| 12                    | 1      | 0      | -1.485102               | -1.827421 | 3.229322  |       |   |   |           |           |          |
| 13                    | 1      | 0      | 0.183743                | -2.199262 | 3.657124  |       |   |   |           |           |          |
| 14                    | 6      | 0      | 1.227607                | -2.612316 | 1.192472  |       |   |   |           |           |          |
| 15                    | 1      | 0      | 1.808233                | -3.068628 | 2.001871  |       |   |   |           |           |          |
| 16                    | 1      | 0      | 1.417052                | -3.193261 | 0.285354  |       |   |   |           |           |          |
| 17                    | 1      | 0      | 1.602056                | -1.599715 | 1.032177  |       |   |   |           |           |          |
| 18                    | 6      | 0      | -0.719416               | -4.066103 | 1.835660  |       |   |   |           |           |          |
| 19                    | 1      | 0      | -0.554783               | -4.709364 | 0.967824  |       |   |   |           |           |          |
| 20                    | 1      | 0      | -0.131802               | -4.480101 | 2.662949  |       |   |   |           |           |          |
| 21                    | 1      | 0      | -1.772096               | -4.131191 | 2.122327  |       |   |   |           |           |          |
| 22                    | 6      | 0      | -3.829156               | 1.663494  | -1.376813 |       |   |   |           |           |          |
| 23                    | 6      | 0      | -3.648478               | 0.743992  | -2.599245 |       |   |   |           |           |          |
| 24                    | 1      | 0      | -2.592009               | 0.582579  | -2.831139 |       |   |   |           |           |          |
| 25                    | 1      | 0      | -4.123295               | -0.229313 | -2.454600 |       |   |   |           |           |          |
| 26                    | 1      | 0      | -4.118279               | 1.208824  | -3.472841 |       |   |   |           |           |          |
| 27                    | 6      | 0      | -3.221335               | 3.045762  | -1.696565 |       |   |   |           |           |          |
| 28                    | 1      | 0      | -3.759192               | 3.478807  | -2.546904 |       |   |   |           |           |          |
| 29                    | 1      | 0      | -3.312633               | 3.745163  | -0.861135 |       |   |   |           |           |          |
| 30                    | 1      | 0      | -2.165964               | 2.970774  | -1.966077 |       |   |   |           |           |          |
| 31                    | 6      | 0      | -5.330210               | 1.835461  | -1.074704 |       |   |   |           |           |          |
| 32                    | 1      | 0      | -5.509560               | 2.511220  | -0.234925 |       |   |   |           |           |          |
| 33                    | 1      | 0      | -5.817124               | 2.272774  | -1.953318 |       |   |   |           |           |          |
| 34                    | 1      | 0      | -5.829049               | 0.885783  | -0.868373 |       |   |   |           |           |          |
| 35                    | 1      | 0      | -3.639524               | 2.983048  | 1.262944  |       |   |   |           |           |          |
| 36                    | 1      | 0      | -2.431875               | 2.083188  | 2.175242  |       |   |   |           |           |          |
| 37                    | 45     | 0      | -0.708454               | 0.538871  | -0.300891 |       |   |   |           |           |          |
| 38                    | 8      | 0      | 1.442858                | 0.264416  | -0.652589 |       |   |   |           |           |          |
| 39                    | 6      | 0      | 2.057657                | 0.167951  | -1.725008 |       |   |   |           |           |          |
| 40                    | 7      | 0      | 3.412255                | 0.076144  | -1.748931 |       |   |   |           |           |          |
| 41                    | 1      | 0      | 3.818462                | -0.220979 | -2.626285 |       |   |   |           |           |          |
| 42                    | 6      | 0      | 1.365936                | 0.187351  | -3.060560 |       |   |   |           |           |          |
| 43                    | 1      | 0      | 2.031104                | -0.062062 | -3.887474 |       |   |   |           |           |          |
| 44                    | 1      | 0      | 0.529880                | -0.513556 | -3.036240 |       |   |   |           |           |          |
| 45                    | 1      | 0      | 0.956086                | 1.188321  | -3.224145 |       |   |   |           |           |          |
| 46                    | 6      | 0      | 4.250795                | -0.087824 | -0.618867 |       |   |   |           |           |          |
| 47                    | 6      | 0      | 4.339997                | 0.750370  | 0.439648  |       |   |   |           |           |          |
| 48                    | 1      | 0      | 4.976330                | 0.388382  | 1.239455  |       |   |   |           |           |          |
| 49                    | 6      | 0      | 3.748623                | 2.063373  | 0.688926  |       |   |   |           |           |          |
| 50                    | 6      | 0      | 3.746050                | 2.533338  | 2.017961  |       |   |   |           |           |          |
| 51                    | 6      | 0      | 3.252704                | 2.913210  | -0.319916 |       |   |   |           |           |          |
| 52                    | 6      | 0      | 3.238136                | 3.791638  | 2.335304  |       |   |   |           |           |          |
| 53                    | 1      | 0      | 4.145452                | 1.900397  | 2.803770  |       |   |   |           |           |          |
| 54                    | 6      | 0      | 2.765994                | 4.178779  | -0.004100 |       |   |   |           |           |          |
| 55                    | 1      | 0      | 3.273659                | 2.598159  | -1.354647 |       |   |   |           |           |          |
| 56                    | 6      | 0      | 2.746526                | 4.620102  | 1.323428  |       |   |   |           |           |          |

|    |   |   |           |           |           |
|----|---|---|-----------|-----------|-----------|
| 57 | 1 | 0 | 3.236325  | 4.128409  | 3.366005  |
| 58 | 1 | 0 | 2.401037  | 4.824138  | -0.795556 |
| 59 | 1 | 0 | 2.359682  | 5.604258  | 1.563904  |
| 60 | 6 | 0 | 5.101974  | -1.306359 | -0.728209 |
| 61 | 8 | 0 | 5.100472  | -2.013747 | -1.721332 |
| 62 | 8 | 0 | 5.874456  | -1.527638 | 0.338041  |
| 63 | 6 | 0 | 6.743707  | -2.677706 | 0.275586  |
| 64 | 1 | 0 | 7.277075  | -2.684568 | 1.223428  |
| 65 | 1 | 0 | 6.155956  | -3.589113 | 0.159217  |
| 66 | 1 | 0 | 7.441359  | -2.577046 | -0.556812 |
| 67 | 1 | 0 | -0.431913 | 1.776642  | 0.593696  |
| 68 | 1 | 0 | -0.496296 | 2.103785  | -0.593554 |
| 69 | 1 | 0 | -4.762659 | -0.645615 | 0.211019  |
| 70 | 6 | 0 | -4.081629 | -0.281785 | 2.216766  |
| 71 | 1 | 0 | -4.884755 | -0.919943 | 2.597399  |
| 72 | 1 | 0 | -3.189497 | -0.495261 | 2.814521  |
| 73 | 6 | 0 | -4.421666 | 1.208200  | 2.334902  |
| 74 | 1 | 0 | -5.405365 | 1.402272  | 1.897031  |
| 75 | 1 | 0 | -4.463884 | 1.529033  | 3.379469  |
| 76 | 6 | 0 | -3.619391 | -2.765301 | -0.694693 |
| 77 | 1 | 0 | -4.559991 | -3.253018 | -0.421405 |
| 78 | 1 | 0 | -3.842342 | -2.088320 | -1.525075 |
| 79 | 6 | 0 | -2.556229 | -3.774218 | -1.144013 |
| 80 | 1 | 0 | -3.185759 | -2.554368 | 1.407008  |
| 81 | 1 | 0 | -2.477520 | -4.586178 | -0.415566 |
| 82 | 1 | 0 | -2.816248 | -4.226763 | -2.105411 |

8

Standard orientation:

| Center Number | Atomic Number | Atomic Type | Coordinates (Angstroms) |           |           |
|---------------|---------------|-------------|-------------------------|-----------|-----------|
|               |               |             | X                       | Y         | Z         |
| 1             | 6             | 0           | -2.997566               | -1.906502 | 0.726106  |
| 2             | 6             | 0           | -3.699443               | -0.540536 | 0.889787  |
| 3             | 15            | 0           | -1.167625               | -1.805959 | 0.246265  |
| 4             | 15            | 0           | -2.886878               | 0.918419  | 0.000357  |
| 5             | 6             | 0           | -1.307352               | -3.112727 | -1.078388 |
| 6             | 1             | 0           | -0.434757               | -3.768510 | -1.089412 |
| 7             | 1             | 0           | -1.336341               | -2.594301 | -2.040930 |
| 8             | 6             | 0           | -3.275176               | 2.149136  | 1.341001  |
| 9             | 6             | 0           | -0.133803               | -2.590106 | 1.629227  |
| 10            | 6             | 0           | -0.194150               | -1.683197 | 2.872852  |
| 11            | 1             | 0           | 0.130478                | -0.663745 | 2.649803  |
| 12            | 1             | 0           | -1.199786               | -1.639406 | 3.299440  |
| 13            | 1             | 0           | 0.469740                | -2.086795 | 3.645228  |
| 14            | 6             | 0           | 1.321580                | -2.655576 | 1.120588  |
| 15            | 1             | 0           | 1.958928                | -3.068388 | 1.910570  |
| 16            | 1             | 0           | 1.421439                | -3.306254 | 0.246837  |
| 17            | 1             | 0           | 1.703789                | -1.667956 | 0.855096  |
| 18            | 6             | 0           | -0.600875               | -4.006755 | 2.011827  |
| 19            | 1             | 0           | -0.521067               | -4.708713 | 1.178440  |
| 20            | 1             | 0           | 0.039512                | -4.384725 | 2.817070  |
| 21            | 1             | 0           | -1.629420               | -4.023239 | 2.381571  |
| 22            | 6             | 0           | -3.899700               | 1.435837  | -1.516937 |
| 23            | 6             | 0           | -3.658075               | 0.435496  | -2.663609 |
| 24            | 1             | 0           | -2.604947               | 0.393678  | -2.955224 |
| 25            | 1             | 0           | -3.985387               | -0.574470 | -2.409367 |
| 26            | 1             | 0           | -4.231574               | 0.753313  | -3.540984 |
| 27            | 6             | 0           | -3.419466               | 2.831478  | -1.970035 |
| 28            | 1             | 0           | -3.976467               | 3.117954  | -2.868492 |
| 29            | 1             | 0           | -3.599846               | 3.599875  | -1.214206 |
| 30            | 1             | 0           | -2.355080               | 2.833845  | -2.213476 |
| 31            | 6             | 0           | -5.404720               | 1.501510  | -1.190442 |

|    |    |   |           |           |           |
|----|----|---|-----------|-----------|-----------|
| 32 | 1  | 0 | -5.624132 | 2.198697  | -0.377455 |
| 33 | 1  | 0 | -5.941000 | 1.857054  | -2.076997 |
| 34 | 1  | 0 | -5.819433 | 0.524896  | -0.930037 |
| 35 | 1  | 0 | -3.704658 | 3.062777  | 0.928154  |
| 36 | 1  | 0 | -2.331873 | 2.416469  | 1.819080  |
| 37 | 45 | 0 | -0.729318 | 0.491342  | -0.430368 |
| 38 | 8  | 0 | 1.436950  | 0.279365  | -0.772962 |
| 39 | 6  | 0 | 2.091128  | 0.256497  | -1.825108 |
| 40 | 7  | 0 | 3.449740  | 0.226173  | -1.803993 |
| 41 | 1  | 0 | 3.897049  | -0.019479 | -2.677536 |
| 42 | 6  | 0 | 1.447001  | 0.299294  | -3.184261 |
| 43 | 1  | 0 | 2.149478  | 0.106495  | -3.995066 |
| 44 | 1  | 0 | 0.638455  | -0.434559 | -3.215480 |
| 45 | 1  | 0 | 1.003648  | 1.289542  | -3.326781 |
| 46 | 6  | 0 | 4.260225  | 0.036749  | -0.658718 |
| 47 | 6  | 0 | 4.258073  | 0.787990  | 0.467288  |
| 48 | 1  | 0 | 4.894349  | 0.402355  | 1.255992  |
| 49 | 6  | 0 | 3.575480  | 2.035396  | 0.803350  |
| 50 | 6  | 0 | 3.501945  | 2.390394  | 2.165691  |
| 51 | 6  | 0 | 3.059194  | 2.936300  | -0.148958 |
| 52 | 6  | 0 | 2.906731  | 3.584793  | 2.567004  |
| 53 | 1  | 0 | 3.915361  | 1.718608  | 2.910929  |
| 54 | 6  | 0 | 2.485671  | 4.140020  | 0.251951  |
| 55 | 1  | 0 | 3.129961  | 2.709962  | -1.204500 |
| 56 | 6  | 0 | 2.396725  | 4.465415  | 1.609668  |
| 57 | 1  | 0 | 2.851261  | 3.832285  | 3.621299  |
| 58 | 1  | 0 | 2.105741  | 4.826914  | -0.496302 |
| 59 | 1  | 0 | 1.941465  | 5.400647  | 1.916487  |
| 60 | 6  | 0 | 5.206488  | -1.101697 | -0.835840 |
| 61 | 8  | 0 | 5.290188  | -1.719474 | -1.883973 |
| 62 | 8  | 0 | 5.960918  | -1.355011 | 0.235680  |
| 63 | 6  | 0 | 6.918708  | -2.427055 | 0.110097  |
| 64 | 1  | 0 | 7.420932  | -2.475674 | 1.073591  |
| 65 | 1  | 0 | 6.407593  | -3.366369 | -0.104440 |
| 66 | 1  | 0 | 7.632069  | -2.202479 | -0.683853 |
| 67 | 1  | 0 | -0.514382 | 0.935541  | 0.996019  |
| 68 | 1  | 0 | -0.606999 | 2.052983  | -0.760878 |
| 69 | 1  | 0 | -4.717503 | -0.627273 | 0.499189  |
| 70 | 6  | 0 | -3.805947 | -0.048489 | 2.351811  |
| 71 | 1  | 0 | -4.520772 | -0.665153 | 2.904869  |
| 72 | 1  | 0 | -2.836570 | -0.152998 | 2.850757  |
| 73 | 6  | 0 | -4.212433 | 1.429715  | 2.332565  |
| 74 | 1  | 0 | -5.252458 | 1.523327  | 2.004324  |
| 75 | 1  | 0 | -4.145954 | 1.879692  | 3.326731  |
| 76 | 6  | 0 | -3.651163 | -2.811752 | -0.349919 |
| 77 | 1  | 0 | -4.559190 | -3.275722 | 0.047161  |
| 78 | 1  | 0 | -3.957786 | -2.199774 | -1.203409 |
| 79 | 6  | 0 | -2.633955 | -3.854808 | -0.825935 |
| 80 | 1  | 0 | -3.053358 | -2.426448 | 1.687060  |
| 81 | 1  | 0 | -2.497269 | -4.622883 | -0.059949 |
| 82 | 1  | 0 | -2.979761 | -4.362059 | -1.731691 |

TS3

Standard orientation:

| Center Number | Atomic Number | Atomic Type | Coordinates (Angstroms) |           |           |
|---------------|---------------|-------------|-------------------------|-----------|-----------|
|               |               |             | X                       | Y         | Z         |
| 1             | 6             | 0           | -3.283363               | -0.507682 | 0.424806  |
| 2             | 6             | 0           | -2.845999               | -1.805709 | -0.290178 |
| 3             | 15            | 0           | -2.048494               | 0.926956  | 0.351345  |
| 4             | 15            | 0           | -0.989533               | -2.018909 | -0.561864 |
| 5             | 6             | 0           | -2.304217               | 1.412169  | 2.134204  |
| 6             | 1             | 0           | -2.348418               | 2.496310  | 2.253328  |

|    |    |   |           |           |           |
|----|----|---|-----------|-----------|-----------|
| 7  | 1  | 0 | -1.433104 | 1.058837  | 2.690373  |
| 8  | 6  | 0 | -1.151304 | -2.717372 | -2.275893 |
| 9  | 6  | 0 | -2.854362 | 2.314196  | -0.663861 |
| 10 | 6  | 0 | -3.047936 | 1.846020  | -2.117804 |
| 11 | 1  | 0 | -2.119258 | 1.471352  | -2.555452 |
| 12 | 1  | 0 | -3.808524 | 1.065473  | -2.196907 |
| 13 | 1  | 0 | -3.388422 | 2.692686  | -2.723964 |
| 14 | 6  | 0 | -1.873177 | 3.500520  | -0.645786 |
| 15 | 1  | 0 | -2.294191 | 4.331229  | -1.222710 |
| 16 | 1  | 0 | -1.680708 | 3.865251  | 0.366960  |
| 17 | 1  | 0 | -0.920223 | 3.223998  | -1.099775 |
| 18 | 6  | 0 | -4.212813 | 2.769597  | -0.098167 |
| 19 | 1  | 0 | -4.125626 | 3.187366  | 0.907423  |
| 20 | 1  | 0 | -4.616790 | 3.557903  | -0.743378 |
| 21 | 1  | 0 | -4.948503 | 1.961727  | -0.075181 |
| 22 | 6  | 0 | -0.348834 | -3.429524 | 0.531966  |
| 23 | 6  | 0 | -0.538904 | -3.072692 | 2.017550  |
| 24 | 1  | 0 | -0.077943 | -2.117243 | 2.270544  |
| 25 | 1  | 0 | -1.595531 | -3.041975 | 2.293348  |
| 26 | 1  | 0 | -0.069441 | -3.851575 | 2.628250  |
| 27 | 6  | 0 | 1.150530  | -3.637913 | 0.238810  |
| 28 | 1  | 0 | 1.507415  | -4.488550 | 0.829273  |
| 29 | 1  | 0 | 1.338838  | -3.865572 | -0.814193 |
| 30 | 1  | 0 | 1.741609  | -2.761941 | 0.509734  |
| 31 | 6  | 0 | -1.107311 | -4.739286 | 0.229174  |
| 32 | 1  | 0 | -0.959565 | -5.085788 | -0.795784 |
| 33 | 1  | 0 | -0.719671 | -5.518107 | 0.894605  |
| 34 | 1  | 0 | -2.179883 | -4.658203 | 0.419916  |
| 35 | 1  | 0 | -0.481817 | -3.565580 | -2.426032 |
| 36 | 1  | 0 | -0.853963 | -1.933775 | -2.973012 |
| 37 | 45 | 0 | 0.072857  | -0.073105 | -0.361493 |
| 38 | 8  | 0 | 0.940769  | -0.095469 | 1.744706  |
| 39 | 6  | 0 | 1.591338  | 0.809536  | 2.287737  |
| 40 | 7  | 0 | 2.200684  | 1.792071  | 1.581225  |
| 41 | 1  | 0 | 2.502671  | 2.611991  | 2.091167  |
| 42 | 6  | 0 | 1.768621  | 0.839222  | 3.782752  |
| 43 | 1  | 0 | 2.454552  | 0.036529  | 4.069504  |
| 44 | 1  | 0 | 2.173065  | 1.786802  | 4.139788  |
| 45 | 1  | 0 | 0.807988  | 0.642447  | 4.260590  |
| 46 | 6  | 0 | 2.152218  | 1.917023  | 0.170112  |
| 47 | 6  | 0 | 2.728925  | 1.036877  | -0.707030 |
| 48 | 1  | 0 | 2.578413  | 1.299109  | -1.747313 |
| 49 | 6  | 0 | 3.698346  | -0.047216 | -0.512790 |
| 50 | 6  | 0 | 4.160933  | -0.691455 | -1.679880 |
| 51 | 6  | 0 | 4.268121  | -0.420660 | 0.719375  |
| 52 | 6  | 0 | 5.139696  | -1.678418 | -1.620935 |
| 53 | 1  | 0 | 3.740645  | -0.410601 | -2.639885 |
| 54 | 6  | 0 | 5.253854  | -1.404835 | 0.776238  |
| 55 | 1  | 0 | 3.967011  | 0.064970  | 1.634997  |
| 56 | 6  | 0 | 5.689538  | -2.042467 | -0.388083 |
| 57 | 1  | 0 | 5.475318  | -2.159681 | -2.532733 |
| 58 | 1  | 0 | 5.683380  | -1.672617 | 1.735205  |
| 59 | 1  | 0 | 6.452915  | -2.810822 | -0.335870 |
| 60 | 6  | 0 | 1.716860  | 3.273325  | -0.271812 |
| 61 | 8  | 0 | 1.510481  | 4.172786  | 0.522595  |
| 62 | 8  | 0 | 1.661792  | 3.421542  | -1.597944 |
| 63 | 6  | 0 | 1.432452  | 4.759655  | -2.090512 |
| 64 | 1  | 0 | 1.403065  | 4.663553  | -3.173396 |
| 65 | 1  | 0 | 0.487021  | 5.149688  | -1.713784 |
| 66 | 1  | 0 | 2.251369  | 5.412403  | -1.784966 |
| 67 | 1  | 0 | -0.401622 | 0.078215  | -1.811067 |
| 68 | 1  | 0 | 1.223249  | -0.947072 | -1.007102 |
| 69 | 1  | 0 | -3.164707 | -2.656516 | 0.320541  |
| 70 | 1  | 0 | -4.200482 | -0.159310 | -0.059682 |
| 71 | 6  | 0 | -3.582242 | -0.690850 | 1.933329  |

|    |   |   |           |           |           |
|----|---|---|-----------|-----------|-----------|
| 72 | 1 | 0 | -4.533849 | -1.213861 | 2.070134  |
| 73 | 1 | 0 | -2.806199 | -1.313882 | 2.386988  |
| 74 | 6 | 0 | -3.575273 | 0.683751  | 2.612033  |
| 75 | 1 | 0 | -3.588999 | 0.589968  | 3.702025  |
| 76 | 1 | 0 | -4.466550 | 1.248651  | 2.325372  |
| 77 | 6 | 0 | -3.445209 | -1.989281 | -1.705850 |
| 78 | 1 | 0 | -4.506777 | -2.243392 | -1.634310 |
| 79 | 1 | 0 | -3.374071 | -1.047185 | -2.257053 |
| 80 | 6 | 0 | -2.642842 | -3.066682 | -2.447123 |
| 81 | 1 | 0 | -2.911028 | -3.106402 | -3.506293 |
| 82 | 1 | 0 | -2.855819 | -4.052259 | -2.022969 |

9

Standard orientation:

| Center Number | Atomic Number | Atomic Type | Coordinates (Angstroms) |           |           |
|---------------|---------------|-------------|-------------------------|-----------|-----------|
|               |               |             | X                       | Y         | Z         |
| 1             | 6             | 0           | 3.166862                | 0.497549  | 0.613823  |
| 2             | 6             | 0           | 2.828991                | 1.760472  | -0.201421 |
| 3             | 15            | 0           | 1.929776                | -0.935094 | 0.482378  |
| 4             | 15            | 0           | 1.002112                | 1.990225  | -0.594796 |
| 5             | 6             | 0           | 2.032241                | -1.363894 | 2.294467  |
| 6             | 1             | 0           | 2.083988                | -2.443009 | 2.447367  |
| 7             | 1             | 0           | 1.113154                | -1.010459 | 2.763824  |
| 8             | 6             | 0           | 1.278048                | 2.530831  | -2.349736 |
| 9             | 6             | 0           | 2.826911                | -2.355672 | -0.416174 |
| 10            | 6             | 0           | 3.050340                | -1.981382 | -1.892373 |
| 11            | 1             | 0           | 2.122786                | -1.675967 | -2.383332 |
| 12            | 1             | 0           | 3.783780                | -1.180207 | -2.005439 |
| 13            | 1             | 0           | 3.441215                | -2.854594 | -2.425700 |
| 14            | 6             | 0           | 1.929547                | -3.603431 | -0.348955 |
| 15            | 1             | 0           | 2.458106                | -4.447935 | -0.803767 |
| 16            | 1             | 0           | 1.674322                | -3.887055 | 0.675011  |
| 17            | 1             | 0           | 1.007775                | -3.452898 | -0.906739 |
| 18            | 6             | 0           | 4.183561                | -2.687145 | 0.236502  |
| 19            | 1             | 0           | 4.074526                | -3.030375 | 1.267505  |
| 20            | 1             | 0           | 4.649280                | -3.501678 | -0.329095 |
| 21            | 1             | 0           | 4.880602                | -1.846593 | 0.221965  |
| 22            | 6             | 0           | 0.349798                | 3.510616  | 0.331686  |
| 23            | 6             | 0           | 0.460915                | 3.293218  | 1.852298  |
| 24            | 1             | 0           | -0.027923               | 2.372105  | 2.172335  |
| 25            | 1             | 0           | 1.501751                | 3.279047  | 2.184201  |
| 26            | 1             | 0           | -0.026338               | 4.131771  | 2.361584  |
| 27            | 6             | 0           | -1.129342               | 3.713496  | -0.050120 |
| 28            | 1             | 0           | -1.495524               | 4.624529  | 0.434916  |
| 29            | 1             | 0           | -1.267565               | 3.837134  | -1.128073 |
| 30            | 1             | 0           | -1.751888               | 2.881558  | 0.282790  |
| 31            | 6             | 0           | 1.147457                | 4.773515  | -0.054416 |
| 32            | 1             | 0           | 1.054476                | 5.022585  | -1.113482 |
| 33            | 1             | 0           | 0.746971                | 5.618788  | 0.515216  |
| 34            | 1             | 0           | 2.208292                | 4.691741  | 0.193497  |
| 35            | 1             | 0           | 0.623661                | 3.361936  | -2.617477 |
| 36            | 1             | 0           | 1.019423                | 1.687719  | -2.991854 |
| 37            | 45            | 0           | -0.190256               | 0.012047  | -0.339384 |
| 38            | 8             | 0           | -0.985826               | 0.271764  | 1.774590  |
| 39            | 6             | 0           | -1.591070               | -0.733346 | 2.204259  |
| 40            | 7             | 0           | -1.889946               | -1.752190 | 1.384773  |
| 41            | 1             | 0           | -2.233976               | -2.624998 | 1.762879  |
| 42            | 6             | 0           | -2.019096               | -0.825945 | 3.641809  |
| 43            | 1             | 0           | -2.298505               | -1.840390 | 3.928560  |
| 44            | 1             | 0           | -1.212999               | -0.467417 | 4.283229  |
| 45            | 1             | 0           | -2.883254               | -0.171462 | 3.790192  |
| 46            | 6             | 0           | -1.655693               | -1.700010 | -0.030095 |

|    |   |   |           |           |           |    |    |   |           |           |           |
|----|---|---|-----------|-----------|-----------|----|----|---|-----------|-----------|-----------|
| 47 | 6 | 0 | -2.275212 | -0.699855 | -0.831263 | 22 | 6  | 0 | 0.521796  | 3.498326  | 0.319845  |
| 48 | 1 | 0 | -2.198117 | -0.899751 | -1.892938 | 23 | 6  | 0 | 0.651588  | 3.286170  | 1.839740  |
| 49 | 6 | 0 | -3.482966 | 0.117844  | -0.491897 | 24 | 1  | 0 | 0.125874  | 2.391735  | 2.177702  |
| 50 | 6 | 0 | -3.783134 | 1.251419  | -1.268494 | 25 | 1  | 0 | 1.696495  | 3.225314  | 2.152610  |
| 51 | 6 | 0 | -4.424542 | -0.292040 | 0.465196  | 26 | 1  | 0 | 0.214288  | 4.150350  | 2.351715  |
| 52 | 6 | 0 | -4.963677 | 1.964883  | -1.079715 | 27 | 6  | 0 | -0.954857 | 3.760586  | -0.033241 |
| 53 | 1 | 0 | -3.079043 | 1.579153  | -2.026074 | 28 | 1  | 0 | -1.276838 | 4.684198  | 0.459327  |
| 54 | 6 | 0 | -5.609139 | 0.424633  | 0.658124  | 29 | 1  | 0 | -1.108254 | 3.891845  | -1.108286 |
| 55 | 1 | 0 | -4.257945 | -1.185779 | 1.049985  | 30 | 1  | 0 | -1.602770 | 2.953159  | 0.311440  |
| 56 | 6 | 0 | -5.882239 | 1.558398  | -0.106218 | 31 | 6  | 0 | 1.364293  | 4.723548  | -0.090776 |
| 57 | 1 | 0 | -5.166873 | 2.837052  | -1.691522 | 32 | 1  | 0 | 1.261296  | 4.967985  | -1.150052 |
| 58 | 1 | 0 | -6.319930 | 0.084744  | 1.403528  | 33 | 1  | 0 | 1.011143  | 5.589710  | 0.478998  |
| 59 | 1 | 0 | -6.800241 | 2.114986  | 0.046725  | 34 | 1  | 0 | 2.425579  | 4.598386  | 0.136605  |
| 60 | 6 | 0 | -1.442472 | -3.064411 | -0.589172 | 35 | 1  | 0 | 0.720804  | 3.322380  | -2.632013 |
| 61 | 8 | 0 | -1.474743 | -4.062218 | 0.108976  | 36 | 1  | 0 | 1.028767  | 1.629770  | -3.005339 |
| 62 | 8 | 0 | -1.295871 | -3.089657 | -1.916292 | 37 | 45 | 0 | -0.160310 | -0.003610 | -0.313682 |
| 63 | 6 | 0 | -1.258946 | -4.392515 | -2.537951 | 38 | 8  | 0 | -0.965144 | 0.307531  | 1.782842  |
| 64 | 1 | 0 | -1.139874 | -4.197487 | -3.601218 | 39 | 6  | 0 | -1.644668 | -0.658096 | 2.194994  |
| 65 | 1 | 0 | -0.417787 | -4.973318 | -2.158543 | 40 | 7  | 0 | -1.983924 | -1.654054 | 1.365763  |
| 66 | 1 | 0 | -2.192311 | -4.923775 | -2.346878 | 41 | 1  | 0 | -2.400434 | -2.500174 | 1.731048  |
| 67 | 1 | 0 | 0.286766  | -0.303513 | -1.761216 | 42 | 6  | 0 | -2.114205 | -0.722664 | 3.620865  |
| 68 | 1 | 0 | -1.125636 | 1.024908  | -1.091848 | 43 | 1  | 0 | -2.476867 | -1.713881 | 3.895262  |
| 69 | 6 | 0 | 3.524754  | 1.841908  | -1.583057 | 44 | 1  | 0 | -1.299112 | -0.429181 | 4.283817  |
| 70 | 1 | 0 | 4.579651  | 2.101688  | -1.456432 | 45 | 1  | 0 | -2.929598 | -0.004969 | 3.751336  |
| 71 | 1 | 0 | 3.490189  | 0.863124  | -2.069028 | 46 | 6  | 0 | -1.714772 | -1.607357 | -0.044950 |
| 72 | 6 | 0 | 3.308747  | 0.746499  | 2.134806  | 47 | 6  | 0 | -2.282228 | -0.561057 | -0.846468 |
| 73 | 1 | 0 | 4.239754  | 1.283109  | 2.341480  | 48 | 1  | 0 | -2.230255 | -0.773078 | -1.908019 |
| 74 | 1 | 0 | 2.488996  | 1.380998  | 2.483587  | 49 | 6  | 0 | -3.488089 | 0.261417  | -0.487986 |
| 75 | 6 | 0 | 2.780126  | 2.859343  | -2.457257 | 50 | 6  | 0 | -3.710849 | 1.500908  | -1.109749 |
| 76 | 1 | 0 | 3.113986  | 2.811052  | -3.497235 | 51 | 6  | 0 | -4.502250 | -0.259165 | 0.330921  |
| 77 | 1 | 0 | 2.974974  | 3.874967  | -2.102199 | 52 | 6  | 0 | -4.892855 | 2.208991  | -0.903291 |
| 78 | 6 | 0 | 3.244772  | -0.599823 | 2.863647  | 53 | 1  | 0 | -2.950441 | 1.917104  | -1.761681 |
| 79 | 1 | 0 | 3.145532  | -0.464092 | 3.944405  | 54 | 6  | 0 | -5.687225 | 0.451058  | 0.542273  |
| 80 | 1 | 0 | 4.165393  | -1.164423 | 2.692815  | 55 | 1  | 0 | -4.389178 | -1.231689 | 0.790482  |
| 81 | 1 | 0 | 3.134699  | 2.635076  | 0.381468  | 56 | 6  | 0 | -5.885885 | 1.689749  | -0.067310 |
| 82 | 1 | 0 | 4.122777  | 0.113639  | 0.248172  | 57 | 1  | 0 | -5.037560 | 3.165007  | -1.394462 |
|    |   |   |           |           |           | 58 | 1  | 0 | -6.455590 | 0.026098  | 1.178869  |
|    |   |   |           |           |           | 59 | 1  | 0 | -6.804287 | 2.241643  | 0.099578  |
|    |   |   |           |           |           | 60 | 6  | 0 | -1.590169 | -2.977467 | -0.611331 |
|    |   |   |           |           |           | 61 | 8  | 0 | -1.690173 | -3.978181 | 0.076948  |
|    |   |   |           |           |           | 62 | 8  | 0 | -1.431440 | -3.001979 | -1.938144 |
|    |   |   |           |           |           | 63 | 6  | 0 | -1.451970 | -4.301090 | -2.567287 |
|    |   |   |           |           |           | 64 | 1  | 0 | -1.310456 | -4.106506 | -3.627933 |
|    |   |   |           |           |           | 65 | 1  | 0 | -0.644894 | -4.924728 | -2.181686 |
|    |   |   |           |           |           | 66 | 1  | 0 | -2.412339 | -4.787435 | -2.390942 |
|    |   |   |           |           |           | 67 | 1  | 0 | 0.318264  | -0.351138 | -1.728686 |
|    |   |   |           |           |           | 68 | 1  | 0 | -1.190776 | 0.928054  | -1.074564 |
|    |   |   |           |           |           | 69 | 1  | 0 | 3.266773  | 2.519653  | 0.304251  |
|    |   |   |           |           |           | 70 | 6  | 0 | 3.575827  | 1.681967  | -1.655009 |
|    |   |   |           |           |           | 71 | 1  | 0 | 4.644228  | 1.895727  | -1.558292 |
|    |   |   |           |           |           | 72 | 1  | 0 | 3.485573  | 0.699987  | -2.127472 |
|    |   |   |           |           |           | 73 | 6  | 0 | 2.855000  | 2.722050  | -2.522511 |
|    |   |   |           |           |           | 74 | 1  | 0 | 3.160852  | 2.649067  | -3.569704 |
|    |   |   |           |           |           | 75 | 1  | 0 | 3.102735  | 3.731334  | -2.182824 |
|    |   |   |           |           |           | 76 | 6  | 0 | 3.416335  | 0.656205  | 2.084877  |
|    |   |   |           |           |           | 77 | 1  | 0 | 4.386199  | 1.132425  | 2.257776  |
|    |   |   |           |           |           | 78 | 1  | 0 | 2.650887  | 1.352670  | 2.437482  |
|    |   |   |           |           |           | 79 | 6  | 0 | 3.278710  | -0.665192 | 2.849054  |
|    |   |   |           |           |           | 80 | 1  | 0 | 3.209961  | -0.496202 | 3.927488  |
|    |   |   |           |           |           | 81 | 1  | 0 | 4.156415  | -1.293100 | 2.675970  |
|    |   |   |           |           |           | 82 | 1  | 0 | 4.146785  | -0.046875 | 0.186899  |

TS4

Standard orientation:

| Center Number | Atomic Number | Atomic Type | Coordinates (Angstroms) |           |           |
|---------------|---------------|-------------|-------------------------|-----------|-----------|
|               |               |             | X                       | Y         | Z         |
| 1             | 6             | 0           | 3.219860                | 0.386402  | 0.572737  |
| 2             | 6             | 0           | 2.911901                | 1.649253  | -0.256264 |
| 3             | 15            | 0           | 1.911764                | -0.982823 | 0.500602  |
| 4             | 15            | 0           | 1.085727                | 1.943772  | -0.609043 |
| 5             | 6             | 0           | 2.007620                | -1.361307 | 2.322248  |
| 6             | 1             | 0           | 1.986685                | -2.436420 | 2.507862  |
| 7             | 1             | 0           | 1.120836                | -0.929234 | 2.788292  |
| 8             | 6             | 0           | 1.342148                | 2.462962  | -2.374866 |
| 9             | 6             | 0           | 2.722164                | -2.469791 | -0.367030 |
| 10            | 6             | 0           | 2.980467                | -2.133843 | -1.846718 |
| 11            | 1             | 0           | 2.075394                | -1.790432 | -2.354033 |
| 12            | 1             | 0           | 3.754700                | -1.372679 | -1.964494 |
| 13            | 1             | 0           | 3.331965                | -3.035255 | -2.359991 |
| 14            | 6             | 0           | 1.747554                | -3.656972 | -0.285035 |
| 15            | 1             | 0           | 2.221635                | -4.540390 | -0.725912 |
| 16            | 1             | 0           | 1.473788                | -3.907783 | 0.742952  |
| 17            | 1             | 0           | 0.837641                | -3.454595 | -0.845943 |
| 18            | 6             | 0           | 4.050902                | -2.872411 | 0.302575  |
| 19            | 1             | 0           | 3.911899                | -3.198758 | 1.335420  |
| 20            | 1             | 0           | 4.473937                | -3.717815 | -0.250950 |
| 21            | 1             | 0           | 4.794523                | -2.072768 | 0.287078  |

10

Standard orientation:



| Center Number | Atomic Number | Atomic Type | Coordinates (Angstroms) |           |           |
|---------------|---------------|-------------|-------------------------|-----------|-----------|
|               |               |             | X                       | Y         | Z         |
| 1             | 6             | 0           | -3.324026               | 0.139975  | 0.623325  |
| 2             | 6             | 0           | -3.313447               | -1.094527 | -0.300382 |
| 3             | 15            | 0           | -1.766850               | 1.213042  | 0.559324  |
| 4             | 15            | 0           | -1.582625               | -1.693718 | -0.736102 |
| 5             | 6             | 0           | -1.702995               | 1.516368  | 2.390578  |
| 6             | 1             | 0           | -1.483158               | 2.561425  | 2.611854  |
| 7             | 1             | 0           | -0.886735               | 0.913024  | 2.788287  |
| 8             | 6             | 0           | -1.953612               | -1.944388 | -2.543013 |
| 9             | 6             | 0           | -2.206271               | 2.876241  | -0.238476 |
| 10            | 6             | 0           | -2.575721               | 2.693130  | -1.720572 |
| 11            | 1             | 0           | -1.790215               | 2.180521  | -2.280703 |
| 12            | 1             | 0           | -3.511064               | 2.143577  | -1.844300 |
| 13            | 1             | 0           | -2.718067               | 3.680873  | -2.171011 |
| 14            | 6             | 0           | -0.983244               | 3.804514  | -0.134758 |
| 15            | 1             | 0           | -1.263889               | 4.798525  | -0.498023 |
| 16            | 1             | 0           | -0.623945               | 3.917081  | 0.891079  |
| 17            | 1             | 0           | -0.164406               | 3.443406  | -0.754215 |
| 18            | 6             | 0           | -3.394683               | 3.529126  | 0.500853  |
| 19            | 1             | 0           | -3.163773               | 3.760611  | 1.542763  |
| 20            | 1             | 0           | -3.624996               | 4.476034  | 0.001765  |
| 21            | 1             | 0           | -4.300399               | 2.919985  | 0.470636  |
| 22            | 6             | 0           | -1.319033               | -3.431138 | -0.027323 |
| 23            | 6             | 0           | -1.302679               | -3.362587 | 1.510774  |
| 24            | 1             | 0           | -0.578176               | -2.633675 | 1.878248  |
| 25            | 1             | 0           | -2.287191               | -3.116230 | 1.917005  |
| 26            | 1             | 0           | -1.028949               | -4.346649 | 1.906903  |
| 27            | 6             | 0           | 0.048254                | -3.936595 | -0.531589 |
| 28            | 1             | 0           | 0.215595                | -4.949719 | -0.151159 |
| 29            | 1             | 0           | 0.099153                | -3.981825 | -1.622935 |
| 30            | 1             | 0           | 0.869137                | -3.311309 | -0.175996 |
| 31            | 6             | 0           | -2.416451               | -4.412283 | -0.483593 |
| 32            | 1             | 0           | -2.428715               | -4.551896 | -1.566761 |
| 33            | 1             | 0           | -2.217053               | -5.390309 | -0.031844 |
| 34            | 1             | 0           | -3.413805               | -4.104084 | -0.160649 |
| 35            | 1             | 0           | -1.498833               | -2.861531 | -2.921141 |
| 36            | 1             | 0           | -1.509791               | -1.107978 | -3.086492 |
| 37            | 45            | 0           | -0.010582               | 0.001006  | -0.218567 |
| 38            | 8             | 0           | 0.759508                | -0.678661 | 1.783847  |
| 39            | 6             | 0           | 1.729138                | 0.018006  | 2.178170  |
| 40            | 7             | 0           | 2.264107                | 0.937510  | 1.375816  |
| 41            | 1             | 0           | 2.985755                | 1.554566  | 1.725812  |
| 42            | 6             | 0           | 2.298609                | -0.175618 | 3.555122  |
| 43            | 1             | 0           | 3.074448                | 0.552543  | 3.792201  |
| 44            | 1             | 0           | 1.492145                | -0.104480 | 4.288042  |
| 45            | 1             | 0           | 2.722417                | -1.180843 | 3.623652  |
| 46            | 6             | 0           | 1.846460                | 1.081773  | -0.001822 |
| 47            | 6             | 0           | 2.323225                | -0.041941 | -0.942705 |
| 48            | 1             | 0           | 2.356724                | 0.352034  | -1.955401 |
| 49            | 6             | 0           | 3.636170                | -0.720050 | -0.596589 |
| 50            | 6             | 0           | 3.703055                | -1.855722 | 0.218054  |
| 51            | 6             | 0           | 4.827340                | -0.183678 | -1.106981 |
| 52            | 6             | 0           | 4.933766                | -2.443784 | 0.521960  |
| 53            | 1             | 0           | 2.792348                | -2.289811 | 0.615774  |
| 54            | 6             | 0           | 6.058125                | -0.768132 | -0.803160 |
| 55            | 1             | 0           | 4.792615                | 0.689674  | -1.750374 |
| 56            | 6             | 0           | 6.115476                | -1.900823 | -0.013756 |
| 57            | 1             | 0           | 4.965619                | -3.325933 | 1.152257  |
| 58            | 1             | 0           | 6.969304                | -0.342314 | -1.209343 |
| 59            | 1             | 0           | 7.070874                | -2.357978 | 0.246747  |
| 60            | 6             | 0           | 2.145125                | 2.466234  | -0.450380 |
| 61            | 8             | 0           | 2.497605                | 3.357922  | 0.305613  |
| 62            | 8             | 0           | 2.011413                | 2.643246  | -1.773869 |
| 63            | 6             | 0           | 2.356489                | 3.944292  | -2.289243 |
| 64            | 1             | 0           | 2.191260                | 3.880495  | -3.362644 |
| 65            | 1             | 0           | 1.717822                | 4.711729  | -1.849954 |
| 66            | 1             | 0           | 3.402318                | 4.169895  | -2.075772 |
| 67            | 1             | 0           | -0.403942               | 0.582314  | -1.587929 |
| 68            | 1             | 0           | 1.556686                | -0.889665 | -1.011735 |
| 69            | 6             | 0           | -4.008167               | -0.878168 | -1.668234 |
| 70            | 1             | 0           | -5.094871               | -0.922537 | -1.551367 |
| 71            | 1             | 0           | -3.766244               | 0.118903  | -2.044757 |
| 72            | 6             | 0           | -3.474551               | -0.192732 | 2.127603  |
| 73            | 1             | 0           | -4.502034               | -0.500800 | 2.341379  |
| 74            | 1             | 0           | -2.825089               | -1.035184 | 2.383586  |
| 75            | 6             | 0           | -3.490971               | -1.921729 | -2.666060 |
| 76            | 1             | 0           | -3.795301               | -1.678322 | -3.687955 |
| 77            | 1             | 0           | -3.905998               | -2.906055 | -2.432671 |
| 78            | 6             | 0           | -3.056458               | 1.032187  | 2.950287  |
| 79            | 1             | 0           | -2.967794               | 0.788122  | 4.012245  |
| 80            | 1             | 0           | -3.809755               | 1.819608  | 2.860934  |
| 81            | 1             | 0           | -4.161567               | 0.780919  | 0.332689  |
| 82            | 1             | 0           | -3.820648               | -1.912232 | 0.219432  |

  

| TS5                   |               |             |                         |           |           |
|-----------------------|---------------|-------------|-------------------------|-----------|-----------|
| Standard orientation: |               |             |                         |           |           |
| Center Number         | Atomic Number | Atomic Type | Coordinates (Angstroms) |           |           |
|                       |               |             | X                       | Y         | Z         |
| 1                     | 6             | 0           | -2.993847               | 1.710752  | 0.422550  |
| 2                     | 6             | 0           | -3.686311               | 0.421721  | -0.066190 |
| 3                     | 15            | 0           | -1.123435               | 1.772417  | 0.082574  |
| 4                     | 15            | 0           | -2.526135               | -1.033681 | -0.269132 |
| 5                     | 6             | 0           | -0.736402               | 2.569038  | 1.711977  |
| 6                     | 1             | 0           | 0.288813                | 2.368415  | 2.018277  |
| 7                     | 1             | 0           | -0.864498               | 3.651454  | 1.622062  |
| 8                     | 6             | 0           | -3.232098               | -1.605363 | -1.891143 |
| 9                     | 6             | 0           | -0.834037               | 3.123524  | -1.233590 |
| 10                    | 6             | 0           | -1.055486               | 2.546701  | -2.643649 |
| 11                    | 1             | 0           | -0.405424               | 1.690577  | -2.837836 |
| 12                    | 1             | 0           | -2.089600               | 2.231791  | -2.801810 |
| 13                    | 1             | 0           | -0.832104               | 3.319914  | -3.386789 |
| 14                    | 6             | 0           | 0.622669                | 3.611357  | -1.114865 |
| 15                    | 1             | 0           | 0.792794                | 4.402506  | -1.852603 |
| 16                    | 1             | 0           | 0.846532                | 4.025847  | -0.128581 |
| 17                    | 1             | 0           | 1.333609                | 2.813949  | -1.324887 |
| 18                    | 6             | 0           | -1.770860               | 4.332340  | -1.029848 |
| 19                    | 1             | 0           | -1.704741               | 4.758142  | -0.025714 |
| 20                    | 1             | 0           | -1.476671               | 5.118097  | -1.733878 |
| 21                    | 1             | 0           | -2.816033               | 4.094352  | -1.236430 |
| 22                    | 6             | 0           | -2.961345               | -2.358649 | 1.015280  |
| 23                    | 6             | 0           | -2.601561               | -1.825375 | 2.414203  |
| 24                    | 1             | 0           | -1.542435               | -1.564366 | 2.485268  |
| 25                    | 1             | 0           | -3.194905               | -0.948851 | 2.687003  |
| 26                    | 1             | 0           | -2.806910               | -2.602502 | 3.158067  |
| 27                    | 6             | 0           | -2.127954               | -3.621986 | 0.723436  |
| 28                    | 1             | 0           | -2.375997               | -4.384888 | 1.469219  |
| 29                    | 1             | 0           | -2.346072               | -4.041565 | -0.262297 |
| 30                    | 1             | 0           | -1.056938               | -3.424378 | 0.778677  |
| 31                    | 6             | 0           | -4.458493               | -2.720975 | 0.966670  |
| 32                    | 1             | 0           | -4.751671               | -3.141753 | 0.001850  |
| 33                    | 1             | 0           | -4.655917               | -3.484508 | 1.727162  |
| 34                    | 1             | 0           | -5.108236               | -1.870596 | 1.186639  |
| 35                    | 45            | 0           | -0.266526               | -0.336766 | -0.316103 |
| 36                    | 8             | 0           | 0.281884                | -2.281569 | -1.024593 |

|    |   |   |           |           |           |    |   |   |           |           |           |
|----|---|---|-----------|-----------|-----------|----|---|---|-----------|-----------|-----------|
| 37 | 6 | 0 | 1.510406  | -2.430829 | -1.230770 | 12 | 6 | 0 | 4.523397  | 0.953858  | 0.286436  |
| 38 | 7 | 0 | 2.361701  | -1.440105 | -0.966473 | 13 | 6 | 0 | 3.440006  | -0.196825 | -1.538861 |
| 39 | 1 | 0 | 3.350998  | -1.593588 | -1.116160 | 14 | 6 | 0 | 5.642912  | 1.178287  | -0.512972 |
| 40 | 6 | 0 | 2.035296  | -3.720501 | -1.791111 | 15 | 1 | 0 | 4.512202  | 1.320919  | 1.307526  |
| 41 | 1 | 0 | 1.389815  | -4.046109 | -2.608163 | 16 | 6 | 0 | 4.558183  | 0.035797  | -2.341229 |
| 42 | 1 | 0 | 3.062354  | -3.631202 | -2.145726 | 17 | 1 | 0 | 2.577089  | -0.690568 | -1.965983 |
| 43 | 1 | 0 | 1.998351  | -4.482387 | -1.007162 | 18 | 6 | 0 | 5.666017  | 0.717484  | -1.832450 |
| 44 | 6 | 0 | 1.973872  | -0.243948 | -0.239796 | 19 | 1 | 0 | 6.492726  | 1.716585  | -0.107522 |
| 45 | 6 | 0 | 2.971587  | 0.899581  | -0.564092 | 20 | 1 | 0 | 4.557206  | -0.309176 | -3.369545 |
| 46 | 1 | 0 | 2.715076  | 1.755860  | 0.056905  | 21 | 1 | 0 | 6.532433  | 0.897474  | -2.459272 |
| 47 | 6 | 0 | 4.431652  | 0.526200  | -0.357559 | 22 | 6 | 0 | 1.983689  | -4.050368 | -1.429415 |
| 48 | 6 | 0 | 5.215252  | 0.122628  | -1.449744 | 23 | 1 | 0 | 1.128113  | -4.722783 | -1.527339 |
| 49 | 6 | 0 | 5.032750  | 0.580334  | 0.909949  | 24 | 1 | 0 | 2.337178  | -3.812241 | -2.435251 |
| 50 | 6 | 0 | 6.556398  | -0.234139 | -1.280985 | 25 | 1 | 0 | 2.776776  | -4.551905 | -0.875563 |
| 51 | 1 | 0 | 4.778885  | 0.102816  | -2.444069 | 26 | 6 | 0 | 1.087722  | -1.386032 | 2.421102  |
| 52 | 6 | 0 | 6.372024  | 0.226119  | 1.081198  | 27 | 8 | 0 | 1.085337  | -0.539877 | 3.293747  |
| 53 | 1 | 0 | 4.453999  | 0.912739  | 1.763798  | 28 | 8 | 0 | 0.604923  | -2.624402 | 2.585928  |
| 54 | 6 | 0 | 7.137813  | -0.187165 | -0.012809 | 29 | 6 | 0 | 0.060200  | -2.932451 | 3.885531  |
| 55 | 1 | 0 | 7.143536  | -0.540467 | -2.139958 | 30 | 1 | 0 | -0.247503 | -3.974171 | 3.828417  |
| 56 | 1 | 0 | 6.818685  | 0.278927  | 2.068314  | 31 | 1 | 0 | 0.822064  | -2.798558 | 4.654593  |
| 57 | 1 | 0 | 8.178522  | -0.460898 | 0.121740  | 32 | 1 | 0 | -0.796076 | -2.290897 | 4.097994  |
| 58 | 6 | 0 | 1.872777  | -0.564058 | 1.248265  | 33 | 6 | 0 | 0.242219  | 3.323903  | -0.103353 |
| 59 | 8 | 0 | 1.817668  | -1.693151 | 1.700906  | 34 | 6 | 0 | -0.468858 | 4.615165  | 0.350142  |
| 60 | 8 | 0 | 1.907405  | 0.533259  | 2.020354  | 35 | 1 | 0 | 0.052247  | 5.468746  | -0.097234 |
| 61 | 6 | 0 | 1.851867  | 0.310859  | 3.445062  | 36 | 1 | 0 | -1.509601 | 4.670553  | 0.026110  |
| 62 | 1 | 0 | 1.894716  | 1.301310  | 3.893179  | 37 | 1 | 0 | -0.434718 | 4.748832  | 1.434103  |
| 63 | 1 | 0 | 0.922828  | -0.192592 | 3.714867  | 38 | 6 | 0 | 0.214683  | 3.231250  | -1.640336 |
| 64 | 1 | 0 | 2.703082  | -0.290848 | 3.766276  | 39 | 1 | 0 | 0.776623  | 4.071434  | -2.062643 |
| 65 | 1 | 0 | 0.826231  | 0.368181  | -1.195835 | 40 | 1 | 0 | 0.671829  | 2.304265  | -1.997062 |
| 66 | 1 | 0 | 2.834177  | 1.191185  | -1.607250 | 41 | 1 | 0 | -0.801121 | 3.289556  | -2.036144 |
| 67 | 1 | 0 | -4.455014 | 0.138881  | 0.657154  | 42 | 6 | 0 | 1.709786  | 3.404410  | 0.359594  |
| 68 | 1 | 0 | -3.439778 | 2.533078  | -0.136131 | 43 | 1 | 0 | 1.810458  | 3.399103  | 1.448351  |
| 69 | 6 | 0 | -3.146932 | 2.041188  | 1.943263  | 44 | 1 | 0 | 2.311660  | 2.597043  | -0.052961 |
| 70 | 1 | 0 | -3.548125 | 3.054806  | 2.033008  | 45 | 1 | 0 | 2.137170  | 4.346695  | 0.000077  |
| 71 | 1 | 0 | -3.875314 | 1.375405  | 2.413192  | 46 | 6 | 0 | -0.675617 | 2.070754  | 2.465936  |
| 72 | 6 | 0 | -1.787794 | 1.983455  | 2.665673  | 47 | 1 | 0 | 0.109640  | 2.754012  | 2.794489  |
| 73 | 1 | 0 | -1.818754 | 2.540348  | 3.606325  | 48 | 1 | 0 | -0.500049 | 1.115448  | 2.961315  |
| 74 | 1 | 0 | -1.527446 | 0.950871  | 2.914804  | 49 | 6 | 0 | -3.003998 | -2.038009 | -0.383059 |
| 75 | 6 | 0 | -4.361202 | 0.561151  | -1.455017 | 50 | 6 | 0 | -2.254139 | -3.316103 | -0.805151 |
| 76 | 6 | 0 | -4.560987 | -0.835731 | -2.056846 | 51 | 1 | 0 | -1.278625 | -3.384875 | -0.325252 |
| 77 | 1 | 0 | -3.349317 | -2.689838 | -1.919246 | 52 | 1 | 0 | -2.846309 | -4.185543 | -0.499917 |
| 78 | 1 | 0 | -2.522473 | -1.330107 | -2.674274 | 53 | 1 | 0 | -2.108830 | -3.377823 | -1.886723 |
| 79 | 1 | 0 | -5.365471 | -1.357996 | -1.530973 | 54 | 6 | 0 | -4.428752 | -2.082106 | -0.970641 |
| 80 | 1 | 0 | -4.847724 | -0.778682 | -3.110512 | 55 | 1 | 0 | -4.944670 | -2.956119 | -0.557964 |
| 81 | 1 | 0 | -5.304043 | 1.107910  | -1.362670 | 56 | 1 | 0 | -5.023322 | -1.203734 | -0.710034 |
| 82 | 1 | 0 | -3.716066 | 1.147241  | -2.116938 | 57 | 1 | 0 | -4.426774 | -2.191757 | -2.057564 |
|    |   |   |           |           |           | 58 | 6 | 0 | -3.085558 | -1.990742 | 1.153269  |
|    |   |   |           |           |           | 59 | 1 | 0 | -2.094399 | -1.911710 | 1.605790  |
|    |   |   |           |           |           | 60 | 1 | 0 | -3.698534 | -1.158916 | 1.508258  |
|    |   |   |           |           |           | 61 | 1 | 0 | -3.551713 | -2.913965 | 1.514026  |
|    |   |   |           |           |           | 62 | 6 | 0 | -2.292475 | -0.470798 | -2.848436 |
|    |   |   |           |           |           | 63 | 1 | 0 | -2.464214 | -1.468429 | -3.256431 |
|    |   |   |           |           |           | 64 | 1 | 0 | -1.369011 | -0.090469 | -3.291123 |
|    |   |   |           |           |           | 65 | 6 | 0 | -2.450666 | 1.970615  | 0.361855  |
|    |   |   |           |           |           | 66 | 6 | 0 | -3.084777 | 1.006747  | -0.658291 |
|    |   |   |           |           |           | 67 | 6 | 0 | -3.049148 | 1.883929  | 1.784985  |
|    |   |   |           |           |           | 68 | 1 | 0 | -4.052462 | 2.320702  | 1.799134  |
|    |   |   |           |           |           | 69 | 1 | 0 | -3.151365 | 0.835889  | 2.082710  |
|    |   |   |           |           |           | 70 | 6 | 0 | -3.347601 | 1.628749  | -2.054217 |
|    |   |   |           |           |           | 71 | 1 | 0 | -4.245171 | 2.253532  | -2.026178 |
|    |   |   |           |           |           | 72 | 1 | 0 | -2.513825 | 2.281910  | -2.325574 |
|    |   |   |           |           |           | 73 | 6 | 0 | -3.461140 | 0.505552  | -3.094135 |
|    |   |   |           |           |           | 74 | 1 | 0 | -3.429604 | 0.903095  | -4.112568 |
|    |   |   |           |           |           | 75 | 1 | 0 | -4.416147 | -0.014303 | -2.981042 |
|    |   |   |           |           |           | 76 | 6 | 0 | -2.097991 | 2.592728  | 2.755028  |

1c

Standard orientation:

| Center Number | Atomic Number | Atomic Type | Coordinates (Angstroms) |           |           |
|---------------|---------------|-------------|-------------------------|-----------|-----------|
|               |               |             | X                       | Y         | Z         |
| 1             | 45            | 0           | 0.149838                | -0.278650 | -0.198364 |
| 2             | 8             | 0           | 0.633953                | -2.074467 | -1.282223 |
| 3             | 6             | 0           | 1.529123                | -2.786061 | -0.764115 |
| 4             | 7             | 0           | 2.084320                | -2.403022 | 0.382753  |
| 5             | 6             | 0           | 1.673141                | -1.191313 | 1.052898  |
| 6             | 6             | 0           | 2.281338                | 0.029068  | 0.728842  |
| 7             | 1             | 0           | 2.192388                | 0.775966  | 1.508609  |
| 8             | 1             | 0           | 2.807149                | -2.968599 | 0.807131  |
| 9             | 15            | 0           | -2.043024               | -0.516046 | -1.003456 |
| 10            | 15            | 0           | -0.582454               | 1.764195  | 0.631554  |
| 11            | 6             | 0           | 3.408346                | 0.246477  | -0.205345 |

|    |   |   |           |          |           |
|----|---|---|-----------|----------|-----------|
| 77 | 1 | 0 | -2.146890 | 3.674448 | 2.601203  |
| 78 | 1 | 0 | -2.374418 | 2.402915 | 3.796163  |
| 79 | 1 | 0 | -4.040637 | 0.661523 | -0.256184 |
| 80 | 1 | 0 | -2.603698 | 2.990230 | 0.001421  |

11

Standard orientation:

| Center Number | Atomic Number | Atomic Type | Coordinates (Angstroms) |           |           |
|---------------|---------------|-------------|-------------------------|-----------|-----------|
|               |               |             | X                       | Y         | Z         |
| 1             | 45            | 0           | 0.220716                | -0.020177 | -0.526466 |
| 2             | 8             | 0           | 1.009968                | -1.726146 | -1.594302 |
| 3             | 6             | 0           | 1.752691                | -2.473987 | -0.909057 |
| 4             | 7             | 0           | 1.992306                | -2.176576 | 0.364490  |
| 5             | 6             | 0           | 1.547042                | -0.934401 | 0.958114  |
| 6             | 6             | 0           | 2.123794                | 0.303733  | 0.480230  |
| 7             | 1             | 0           | 1.998884                | 1.088479  | 1.218727  |
| 8             | 1             | 0           | 2.535108                | -2.816230 | 0.928409  |
| 9             | 15            | 0           | -2.023417               | -0.905270 | -0.853398 |
| 10            | 15            | 0           | -0.863819               | 1.800192  | 0.429889  |
| 11            | 6             | 0           | 3.443475                | 0.429283  | -0.215019 |
| 12            | 6             | 0           | 4.499108                | 1.004879  | 0.518985  |
| 13            | 6             | 0           | 3.705843                | 0.036256  | -1.536446 |
| 14            | 6             | 0           | 5.770037                | 1.158744  | -0.036055 |
| 15            | 1             | 0           | 4.319574                | 1.333404  | 1.537880  |
| 16            | 6             | 0           | 4.978062                | 0.186396  | -2.093817 |
| 17            | 1             | 0           | 2.908369                | -0.364777 | -2.148007 |
| 18            | 6             | 0           | 6.017864                | 0.744477  | -1.347313 |
| 19            | 1             | 0           | 6.562950                | 1.604934  | 0.554901  |
| 20            | 1             | 0           | 5.150324                | -0.124225 | -3.118981 |
| 21            | 1             | 0           | 7.003267                | 0.865164  | -1.783916 |
| 22            | 6             | 0           | 2.376112                | -3.694029 | -1.519608 |
| 23            | 1             | 0           | 1.635351                | -4.205806 | -2.135298 |
| 24            | 1             | 0           | 3.197415                | -3.380581 | -2.170242 |
| 25            | 1             | 0           | 2.767571                | -4.377263 | -0.765645 |
| 26            | 6             | 0           | 1.211032                | -1.069954 | 2.404033  |
| 27            | 8             | 0           | 1.165949                | -0.150202 | 3.199111  |
| 28            | 8             | 0           | 1.002940                | -2.349796 | 2.755676  |
| 29            | 6             | 0           | 0.725661                | -2.598228 | 4.149602  |
| 30            | 1             | 0           | 0.608377                | -3.676532 | 4.231207  |
| 31            | 1             | 0           | 1.557422                | -2.254620 | 4.765842  |
| 32            | 1             | 0           | -0.191176               | -2.088687 | 4.448194  |
| 33            | 6             | 0           | -0.263319               | 3.526942  | -0.144091 |
| 34            | 6             | 0           | -1.173923               | 4.644340  | 0.411696  |
| 35            | 1             | 0           | -0.743652               | 5.606902  | 0.116838  |
| 36            | 1             | 0           | -2.182716               | 4.602846  | -0.004150 |
| 37            | 1             | 0           | -1.243518               | 4.644828  | 1.500645  |
| 38            | 6             | 0           | -0.264712               | 3.646415  | -1.680544 |
| 39            | 1             | 0           | -0.029728               | 4.682107  | -1.946277 |
| 40            | 1             | 0           | 0.490876                | 3.017126  | -2.149910 |
| 41            | 1             | 0           | -1.236671               | 3.410905  | -2.122512 |
| 42            | 6             | 0           | 1.171341                | 3.743724  | 0.377648  |
| 43            | 1             | 0           | 1.237062                | 3.663503  | 1.466389  |
| 44            | 1             | 0           | 1.874739                | 3.037989  | -0.066855 |
| 45            | 1             | 0           | 1.497531                | 4.752994  | 0.104847  |
| 46            | 6             | 0           | -1.049818               | 1.927782  | 2.273086  |
| 47            | 1             | 0           | -0.737102               | 2.925486  | 2.587115  |
| 48            | 1             | 0           | -0.400266               | 1.211917  | 2.771061  |
| 49            | 6             | 0           | -2.601679               | -2.546054 | -0.091162 |
| 50            | 6             | 0           | -1.780240               | -3.684614 | -0.726784 |
| 51            | 1             | 0           | -0.715117               | -3.579138 | -0.516973 |
| 52            | 1             | 0           | -2.109528               | -4.641407 | -0.307375 |
| 53            | 1             | 0           | -1.913850               | -3.736050 | -1.810955 |

|    |   |   |           |           |           |
|----|---|---|-----------|-----------|-----------|
| 54 | 6 | 0 | -4.101422 | -2.811319 | -0.327951 |
| 55 | 1 | 0 | -4.361348 | -3.771285 | 0.131797  |
| 56 | 1 | 0 | -4.736620 | -2.051003 | 0.132424  |
| 57 | 1 | 0 | -4.357318 | -2.881486 | -1.387423 |
| 58 | 6 | 0 | -2.333720 | -2.503045 | 1.423761  |
| 59 | 1 | 0 | -1.280482 | -2.324469 | 1.643392  |
| 60 | 1 | 0 | -2.927171 | -1.733006 | 1.924401  |
| 61 | 1 | 0 | -2.611506 | -3.466190 | 1.865739  |
| 62 | 6 | 0 | -2.560015 | -0.960573 | -2.640434 |
| 63 | 1 | 0 | -3.135835 | -1.869814 | -2.826541 |
| 64 | 1 | 0 | -1.690786 | -0.979358 | -3.299509 |
| 65 | 6 | 0 | -2.718157 | 1.755703  | 0.076021  |
| 66 | 6 | 0 | -3.298647 | 0.377380  | -0.341936 |
| 67 | 1 | 0 | 0.681951  | 0.982395  | -1.889873 |
| 68 | 1 | 0 | -0.085635 | 0.735627  | -2.106721 |
| 69 | 6 | 0 | -4.260813 | 0.484981  | -1.554979 |
| 70 | 1 | 0 | -5.018245 | -0.301417 | -1.491416 |
| 71 | 1 | 0 | -4.792919 | 1.440924  | -1.548982 |
| 72 | 6 | 0 | -3.361761 | 2.263178  | 1.392967  |
| 73 | 1 | 0 | -3.341718 | 3.354075  | 1.429698  |
| 74 | 1 | 0 | -4.412675 | 1.964135  | 1.444102  |
| 75 | 6 | 0 | -3.438281 | 0.291867  | -2.839438 |
| 76 | 1 | 0 | -2.805165 | 1.167891  | -3.015811 |
| 77 | 1 | 0 | -4.081718 | 1.845511  | -3.717103 |
| 78 | 6 | 0 | -2.547210 | 1.694061  | 2.566674  |
| 79 | 1 | 0 | -2.832790 | 2.158877  | 3.514062  |
| 80 | 1 | 0 | -2.736003 | 0.621100  | 2.669579  |
| 81 | 1 | 0 | -2.896058 | 2.463468  | -0.736990 |
| 82 | 1 | 0 | -3.830195 | -0.032599 | 0.519416  |

TS6

Standard orientation:

| Center Number | Atomic Number | Atomic Type | Coordinates (Angstroms) |           |           |
|---------------|---------------|-------------|-------------------------|-----------|-----------|
|               |               |             | X                       | Y         | Z         |
| 1             | 45            | 0           | 0.149707                | 0.156055  | -0.549654 |
| 2             | 8             | 0           | 1.052062                | -1.350227 | -1.882479 |
| 3             | 6             | 0           | 1.813545                | -2.196164 | -1.360031 |
| 4             | 7             | 0           | 2.117552                | -2.128349 | -0.058416 |
| 5             | 6             | 0           | 1.652497                | -1.068860 | 0.787735  |
| 6             | 6             | 0           | 2.162293                | 0.250247  | 0.587765  |
| 7             | 1             | 0           | 1.949803                | 0.899013  | 1.430719  |
| 8             | 1             | 0           | 2.664397                | -2.871456 | 0.354315  |
| 9             | 15            | 0           | -1.976102               | -0.934297 | -0.778584 |
| 10            | 15            | 0           | -0.964371               | 1.862631  | 0.483154  |
| 11            | 6             | 0           | 3.505312                | 0.533512  | -0.022148 |
| 12            | 6             | 0           | 4.511914                | 0.947021  | 0.866616  |
| 13            | 6             | 0           | 3.820372                | 0.398121  | -1.379931 |
| 14            | 6             | 0           | 5.807092                | 1.196388  | 0.410864  |
| 15            | 1             | 0           | 4.280377                | 1.072850  | 1.919293  |
| 16            | 6             | 0           | 5.116293                | 0.649466  | -1.835759 |
| 17            | 1             | 0           | 3.048609                | 0.124662  | -2.088377 |
| 18            | 6             | 0           | 6.115094                | 1.044855  | -0.943342 |
| 19            | 1             | 0           | 6.569878                | 1.515215  | 1.112792  |
| 20            | 1             | 0           | 5.340278                | 0.543703  | -2.891673 |
| 21            | 1             | 0           | 7.119474                | 1.243564  | -1.300691 |
| 22            | 6             | 0           | 2.406527                | -3.300277 | -2.187002 |
| 23            | 1             | 0           | 1.610460                | -3.784023 | -2.756037 |
| 24            | 1             | 0           | 3.112613                | -2.866936 | -2.900269 |
| 25            | 1             | 0           | 2.927369                | -4.041091 | -1.579972 |
| 26            | 6             | 0           | 1.207848                | -1.467811 | 2.140153  |
| 27            | 8             | 0           | 0.976224                | -0.702470 | 3.060209  |
| 28            | 8             | 0           | 1.140963                | -2.806173 | 2.266263  |

|    |   |   |           |           |           |    |    |   |           |           |           |
|----|---|---|-----------|-----------|-----------|----|----|---|-----------|-----------|-----------|
| 29 | 6 | 0 | 0.828571  | -3.315304 | 3.578531  | 4  | 7  | 0 | 2.288057  | -1.676310 | -0.111692 |
| 30 | 1 | 0 | 0.827706  | -4.397965 | 3.472870  | 5  | 6  | 0 | 1.676493  | -0.638838 | 0.687418  |
| 31 | 1 | 0 | 1.589041  | -3.000545 | 4.294488  | 6  | 6  | 0 | 2.160006  | 0.771288  | 0.378605  |
| 32 | 1 | 0 | -0.151118 | -2.962045 | 3.901600  | 7  | 1  | 0 | 1.987399  | 1.384476  | 1.262754  |
| 33 | 6 | 0 | -0.686292 | 3.613583  | -0.202673 | 8  | 1  | 0 | 3.013108  | -2.254412 | 0.292434  |
| 34 | 6 | 0 | -1.482697 | 4.649675  | 0.620517  | 9  | 15 | 0 | -1.892184 | -1.148477 | -0.727073 |
| 35 | 1 | 0 | -1.318462 | 5.637859  | 0.178856  | 10 | 15 | 0 | -1.318586 | 1.717223  | 0.464876  |
| 36 | 1 | 0 | -2.559034 | 4.463828  | 0.604425  | 11 | 6  | 0 | 3.591002  | 0.913881  | -0.109624 |
| 37 | 1 | 0 | -1.152536 | 4.701576  | 1.659709  | 12 | 6  | 0 | 4.641949  | 0.812968  | 0.813998  |
| 38 | 6 | 0 | -1.129147 | 3.709523  | -1.673478 | 13 | 6  | 0 | 3.892661  | 1.140844  | -1.455930 |
| 39 | 1 | 0 | -0.899017 | 4.714065  | -2.043372 | 14 | 6  | 0 | 5.967358  | 0.933298  | 0.394760  |
| 40 | 1 | 0 | -0.605895 | 2.993089  | -2.310041 | 15 | 1  | 0 | 4.422929  | 0.645590  | 1.863785  |
| 41 | 1 | 0 | -2.205329 | 3.560230  | -1.790180 | 16 | 6  | 0 | 5.220382  | 1.261593  | -1.878230 |
| 42 | 6 | 0 | 0.815286  | 3.950945  | -0.102092 | 17 | 1  | 0 | 3.088987  | 1.229289  | -2.180498 |
| 43 | 1 | 0 | 1.192684  | 3.872985  | 0.921198  | 18 | 6  | 0 | 6.261287  | 1.157034  | -0.954263 |
| 44 | 1 | 0 | 1.420929  | 3.308000  | -0.743822 | 19 | 1  | 0 | 6.769202  | 0.856880  | 1.121340  |
| 45 | 1 | 0 | 0.965278  | 4.984654  | -0.430379 | 20 | 1  | 0 | 5.436926  | 1.439253  | -2.926098 |
| 46 | 6 | 0 | -0.787939 | 2.019476  | 2.323632  | 21 | 1  | 0 | 7.291633  | 1.252271  | -1.278998 |
| 47 | 1 | 0 | -0.131052 | 2.848832  | 2.591549  | 22 | 6  | 0 | 2.768486  | -2.820629 | -2.223221 |
| 48 | 1 | 0 | -0.324619 | 1.101136  | 2.688273  | 23 | 1  | 0 | 2.076534  | -3.435181 | -2.801513 |
| 49 | 6 | 0 | -2.462112 | -2.573761 | 0.041044  | 24 | 1  | 0 | 3.395132  | -2.265824 | -2.926971 |
| 50 | 6 | 0 | -1.408461 | -3.620910 | -0.374086 | 25 | 1  | 0 | 3.407218  | -3.459451 | -1.612575 |
| 51 | 1 | 0 | -0.415836 | -3.363355 | -0.001517 | 26 | 6  | 0 | 1.548411  | -0.978557 | 2.106627  |
| 52 | 1 | 0 | -1.682248 | -4.591146 | 0.054110  | 27 | 8  | 0 | 1.359786  | -0.179326 | 3.014627  |
| 53 | 1 | 0 | -1.351980 | -3.744691 | -1.459090 | 28 | 8  | 0 | 1.661660  | 0.309287  | 2.333228  |
| 54 | 6 | 0 | -3.858296 | -3.052141 | -0.403499 | 29 | 6  | 0 | 1.551920  | -2.739238 | 3.701775  |
| 55 | 1 | 0 | -4.087878 | -3.987622 | 0.118848  | 30 | 1  | 0 | 1.675971  | -3.820229 | 3.675692  |
| 56 | 1 | 0 | -4.645116 | -2.337853 | -0.148497 | 31 | 1  | 0 | 2.333656  | -2.281228 | 4.309818  |
| 57 | 1 | 0 | -3.909671 | -3.259055 | -1.474645 | 32 | 1  | 0 | 0.573266  | -2.479448 | 4.108277  |
| 58 | 6 | 0 | -2.453933 | -2.413976 | 1.571087  | 33 | 6  | 0 | -1.279024 | 3.463964  | -0.288562 |
| 59 | 1 | 0 | -1.532903 | -1.953905 | 1.933828  | 34 | 6  | 0 | -2.112696 | 4.440887  | 0.567912  |
| 60 | 1 | 0 | -3.298488 | -1.815167 | 1.918610  | 35 | 1  | 0 | -2.069702 | 5.429721  | 0.099679  |
| 61 | 1 | 0 | -2.542838 | -3.400905 | 2.037011  | 36 | 1  | 0 | -3.165920 | 4.155803  | 0.622812  |
| 62 | 6 | 0 | -2.445100 | -1.128940 | -2.571423 | 37 | 1  | 0 | -1.725139 | 4.546663  | 1.582762  |
| 63 | 1 | 0 | -2.495611 | -2.178761 | -2.862314 | 38 | 6  | 0 | -1.842358 | 3.462846  | -1.720047 |
| 64 | 1 | 0 | -1.659234 | -0.660784 | -3.166688 | 39 | 1  | 0 | -1.748746 | 4.472587  | -2.133123 |
| 65 | 6 | 0 | -2.818716 | 1.506272  | 0.519127  | 40 | 1  | 0 | -1.299308 | 2.781619  | -2.377983 |
| 66 | 6 | 0 | -3.288759 | 0.367591  | -0.408516 | 41 | 1  | 0 | -2.902823 | 3.200756  | -1.743961 |
| 67 | 1 | 0 | 1.373670  | 1.167055  | -0.702279 | 42 | 6  | 0 | 0.185372  | 3.947921  | -0.318368 |
| 68 | 1 | 0 | -0.418390 | 0.944911  | -1.762770 | 43 | 1  | 0 | 0.648769  | 3.942468  | 0.672116  |
| 69 | 1 | 0 | -3.319701 | 2.428125  | 0.208545  | 44 | 1  | 0 | 0.799301  | 3.349390  | -0.995023 |
| 70 | 1 | 0 | -4.130048 | -0.138316 | 0.075472  | 45 | 1  | 0 | 0.207821  | 4.980011  | -0.682898 |
| 71 | 6 | 0 | -3.129580 | 1.271261  | 2.018275  | 46 | 6  | 0 | -1.109077 | 1.944929  | 2.292864  |
| 72 | 1 | 0 | -4.189715 | 1.456359  | 2.213745  | 47 | 1  | 0 | -0.553934 | 2.856343  | 2.521136  |
| 73 | 1 | 0 | -2.934634 | 0.226412  | 2.270480  | 48 | 1  | 0 | -0.517238 | 1.104788  | 2.660959  |
| 74 | 6 | 0 | -2.222512 | 2.165158  | 2.872748  | 49 | 6  | 0 | -1.985809 | -2.809950 | 0.177126  |
| 75 | 1 | 0 | -2.260901 | 1.874756  | 3.926305  | 50 | 6  | 0 | -0.795015 | -3.677020 | -0.277052 |
| 76 | 1 | 0 | -2.552347 | 3.205199  | 2.812681  | 51 | 1  | 0 | 0.154687  | -3.261467 | 0.058902  |
| 77 | 6 | 0 | -3.753022 | 0.833459  | -1.809343 | 52 | 1  | 0 | -0.897597 | -4.671441 | 0.169461  |
| 78 | 1 | 0 | -4.727611 | 1.325740  | -1.738929 | 53 | 1  | 0 | -0.760217 | -3.805891 | -1.361846 |
| 79 | 1 | 0 | -3.047954 | 1.571000  | -2.204210 | 54 | 6  | 0 | -3.303381 | -3.536583 | -0.169903 |
| 80 | 6 | 0 | -3.785354 | -0.382550 | -2.742451 | 55 | 1  | 0 | -3.328264 | -4.476660 | 0.391198  |
| 81 | 1 | 0 | -3.935186 | -0.084274 | -3.783799 | 56 | 1  | 0 | -4.189742 | -2.966273 | 0.117456  |
| 82 | 1 | 0 | -4.618120 | -1.038136 | -2.471259 | 57 | 1  | 0 | -3.378522 | -3.789873 | -1.229383 |
|    |   |   |           |           |           | 58 | 6  | 0 | -1.915046 | -2.599281 | 1.699381  |
|    |   |   |           |           |           | 59 | 1  | 0 | -1.061907 | -1.984705 | 1.990713  |
|    |   |   |           |           |           | 60 | 1  | 0 | -2.827139 | -2.143486 | 2.090273  |
|    |   |   |           |           |           | 61 | 1  | 0 | -1.807492 | -3.574176 | 2.185706  |
|    |   |   |           |           |           | 62 | 6  | 0 | -2.377642 | -1.495305 | -2.485617 |
|    |   |   |           |           |           | 63 | 1  | 0 | -2.244538 | -2.547049 | -2.739849 |
|    |   |   |           |           |           | 64 | 1  | 0 | -1.716076 | -0.911773 | -3.126700 |
|    |   |   |           |           |           | 65 | 6  | 0 | -3.101980 | 1.124373  | 0.564565  |
|    |   |   |           |           |           | 66 | 6  | 0 | -3.399015 | -0.103961 | -0.318568 |
|    |   |   |           |           |           | 67 | 1  | 0 | 1.542831  | 1.284978  | -0.443156 |
|    |   |   |           |           |           | 68 | 1  | 0 | -0.724249 | 0.856738  | -1.813199 |

  

| Standard orientation: |               |             |                         |           |           |  |
|-----------------------|---------------|-------------|-------------------------|-----------|-----------|--|
| Center Number         | Atomic Number | Atomic Type | Coordinates (Angstroms) |           |           |  |
|                       |               |             | X                       | Y         | Z         |  |
| 1                     | 45            | 0           | -0.032153               | 0.141642  | -0.597063 |  |
| 2                     | 8             | 0           | 1.048155                | -1.183198 | -1.920824 |  |
| 3                     | 6             | 0           | 1.985140                | -1.843780 | -1.395926 |  |

|    |   |   |           |           |           |    |   |   |           |           |           |
|----|---|---|-----------|-----------|-----------|----|---|---|-----------|-----------|-----------|
| 69 | 1 | 0 | -4.100956 | -0.751965 | 0.213906  | 44 | 1 | 0 | 1.420929  | 3.308000  | -0.743822 |
| 70 | 1 | 0 | -3.737188 | 1.950054  | 0.231532  | 45 | 1 | 0 | 0.965278  | 4.984654  | -0.430379 |
| 71 | 6 | 0 | -4.002021 | 0.217748  | -1.708119 | 46 | 6 | 0 | -0.787939 | 2.019476  | 2.323632  |
| 72 | 1 | 0 | -5.049519 | 0.513687  | -1.602150 | 47 | 1 | 0 | -0.131052 | 2.848832  | 2.591549  |
| 73 | 1 | 0 | -3.469993 | 1.063150  | -2.153741 | 48 | 1 | 0 | -0.324619 | 1.101136  | 2.688273  |
| 74 | 6 | 0 | -3.840475 | -1.014651 | -2.608755 | 49 | 6 | 0 | -2.462112 | -2.573761 | 0.041044  |
| 75 | 1 | 0 | -4.082939 | -0.783165 | -3.649077 | 50 | 6 | 0 | -1.408461 | -3.620910 | -0.374086 |
| 76 | 1 | 0 | -4.523618 | -1.805055 | -2.284884 | 51 | 1 | 0 | -0.415836 | -3.363355 | -0.001517 |
| 77 | 6 | 0 | -3.346248 | 0.898311  | 2.077816  | 52 | 1 | 0 | -1.682248 | -4.591146 | 0.054110  |
| 78 | 1 | 0 | -4.415941 | 0.955661  | 2.297778  | 53 | 1 | 0 | -1.351980 | -3.744691 | -1.459090 |
| 79 | 1 | 0 | -3.014392 | -0.105634 | 2.352242  | 54 | 6 | 0 | -3.858296 | -3.052141 | -0.403499 |
| 80 | 6 | 0 | -2.535821 | 1.924351  | 2.881105  | 55 | 1 | 0 | -4.087878 | -3.987622 | 0.118848  |
| 81 | 1 | 0 | -2.509863 | 1.662407  | 3.942426  | 56 | 1 | 0 | -4.645116 | -2.337853 | -0.148497 |
| 82 | 1 | 0 | -2.996343 | 2.912731  | 2.804257  | 57 | 1 | 0 | -3.909671 | -3.259055 | -1.474645 |
|    |   |   |           |           |           | 58 | 6 | 0 | -2.453933 | -2.413976 | 1.571087  |
|    |   |   |           |           |           | 59 | 1 | 0 | -1.532903 | -1.953905 | 1.933828  |
|    |   |   |           |           |           | 60 | 1 | 0 | -3.298488 | -1.815167 | 1.918610  |
|    |   |   |           |           |           | 61 | 1 | 0 | -2.542838 | -3.400905 | 2.037011  |
|    |   |   |           |           |           | 62 | 6 | 0 | -2.445100 | -1.128940 | -2.571423 |
|    |   |   |           |           |           | 63 | 1 | 0 | -2.495611 | -2.178761 | -2.862314 |
|    |   |   |           |           |           | 64 | 1 | 0 | -1.659234 | -0.660784 | -3.166688 |
|    |   |   |           |           |           | 65 | 6 | 0 | -2.818716 | 1.506272  | 0.519127  |
|    |   |   |           |           |           | 66 | 6 | 0 | -3.288759 | 0.367591  | -0.408516 |
|    |   |   |           |           |           | 67 | 1 | 0 | 1.373670  | 1.167055  | -0.702279 |
|    |   |   |           |           |           | 68 | 1 | 0 | -0.418390 | 0.944911  | -1.762770 |
|    |   |   |           |           |           | 69 | 1 | 0 | -3.319701 | 2.428125  | 0.208545  |
|    |   |   |           |           |           | 70 | 1 | 0 | -4.130048 | -0.138316 | 0.075472  |
|    |   |   |           |           |           | 71 | 6 | 0 | -3.129580 | 1.271261  | 2.018275  |
|    |   |   |           |           |           | 72 | 1 | 0 | -4.189715 | 1.456359  | 2.213745  |
|    |   |   |           |           |           | 73 | 1 | 0 | -2.934634 | 0.226412  | 2.270480  |
|    |   |   |           |           |           | 74 | 6 | 0 | -2.222512 | 2.165158  | 2.872748  |
|    |   |   |           |           |           | 75 | 1 | 0 | -2.260901 | 1.874756  | 3.926305  |
|    |   |   |           |           |           | 76 | 1 | 0 | -2.552347 | 3.205199  | 2.812681  |
|    |   |   |           |           |           | 77 | 6 | 0 | -3.753022 | 0.833459  | -1.809343 |
|    |   |   |           |           |           | 78 | 1 | 0 | -4.727611 | 1.325740  | -1.738929 |
|    |   |   |           |           |           | 79 | 1 | 0 | -3.047954 | 1.571000  | -2.204210 |
|    |   |   |           |           |           | 80 | 6 | 0 | -3.785354 | -0.382550 | -2.742451 |
|    |   |   |           |           |           | 81 | 1 | 0 | -3.935186 | -0.084274 | -3.783799 |
|    |   |   |           |           |           | 82 | 1 | 0 | -4.618120 | -1.038136 | -2.471259 |

TS7

Standard orientation:

| Center Number | Atomic Number | Atomic Type | Coordinates (Angstroms) |           |           |
|---------------|---------------|-------------|-------------------------|-----------|-----------|
|               |               |             | X                       | Y         | Z         |
| 1             | 45            | 0           | 0.149707                | 0.156055  | -0.549654 |
| 2             | 8             | 0           | 1.052062                | -1.350227 | -1.882479 |
| 3             | 6             | 0           | 1.813545                | -2.196164 | -1.360031 |
| 4             | 7             | 0           | 2.117552                | -2.128349 | -0.058416 |
| 5             | 6             | 0           | 1.652497                | -1.068860 | 0.787735  |
| 6             | 6             | 0           | 2.162293                | 0.250247  | 0.587765  |
| 7             | 1             | 0           | 1.949803                | 0.899013  | 1.430719  |
| 8             | 1             | 0           | 2.664397                | -2.871456 | 0.354315  |
| 9             | 15            | 0           | -1.976102               | -0.934297 | -0.778584 |
| 10            | 15            | 0           | -0.964371               | 1.862631  | 0.483154  |
| 11            | 6             | 0           | 3.505312                | 0.533512  | -0.022148 |
| 12            | 6             | 0           | 4.511914                | 0.947021  | 0.866616  |
| 13            | 6             | 0           | 3.820372                | 0.398121  | -1.379931 |
| 14            | 6             | 0           | 5.807092                | 1.196388  | 0.410864  |
| 15            | 1             | 0           | 4.280377                | 1.072850  | 1.919293  |
| 16            | 6             | 0           | 5.116293                | 0.649466  | -1.835759 |
| 17            | 1             | 0           | 3.048609                | 0.124662  | -2.088377 |
| 18            | 6             | 0           | 6.115094                | 1.044855  | -0.943342 |
| 19            | 1             | 0           | 6.569878                | 1.515215  | 1.112792  |
| 20            | 1             | 0           | 5.340278                | 0.543703  | -2.891673 |
| 21            | 1             | 0           | 7.119474                | 1.243564  | -1.300691 |
| 22            | 6             | 0           | 2.406527                | -3.300277 | -2.187002 |
| 23            | 1             | 0           | 1.610460                | -3.784023 | -2.756037 |
| 24            | 1             | 0           | 3.112613                | -2.866936 | -2.900269 |
| 25            | 1             | 0           | 2.927369                | -4.041091 | -1.579972 |
| 26            | 6             | 0           | 1.207848                | -1.467811 | 2.140153  |
| 27            | 8             | 0           | 0.976224                | -0.702470 | 3.060209  |
| 28            | 8             | 0           | 1.140963                | -2.806173 | 2.266263  |
| 29            | 6             | 0           | 0.828571                | -3.315304 | 3.578531  |
| 30            | 1             | 0           | 0.827706                | -4.397965 | 3.472870  |
| 31            | 1             | 0           | 1.589041                | -3.000545 | 4.294488  |
| 32            | 1             | 0           | -0.151118               | -2.962045 | 3.901600  |
| 33            | 6             | 0           | -0.686292               | 3.613583  | -0.202673 |
| 34            | 6             | 0           | -1.482697               | 4.649675  | 0.620517  |
| 35            | 1             | 0           | -1.318462               | 5.637859  | 0.178856  |
| 36            | 1             | 0           | -2.559034               | 4.463828  | 0.604425  |
| 37            | 1             | 0           | -1.152536               | 4.701576  | 1.659709  |
| 38            | 6             | 0           | -1.129147               | 3.709523  | -1.673478 |
| 39            | 1             | 0           | -0.899017               | 4.714065  | -2.043372 |
| 40            | 1             | 0           | -0.605895               | 2.993089  | -2.310041 |
| 41            | 1             | 0           | -2.205329               | 3.560230  | -1.790180 |
| 42            | 6             | 0           | 0.815286                | 3.950945  | -0.102092 |
| 43            | 1             | 0           | 1.192684                | 3.872985  | 0.921198  |

13

Standard orientation:

| Center Number | Atomic Number | Atomic Type | Coordinates (Angstroms) |           |           |
|---------------|---------------|-------------|-------------------------|-----------|-----------|
|               |               |             | X                       | Y         | Z         |
| 1             | 45            | 0           | -0.032153               | 0.141642  | -0.597063 |
| 2             | 8             | 0           | 1.048155                | -1.183198 | -1.920824 |
| 3             | 6             | 0           | 1.985140                | -1.843780 | -1.395926 |
| 4             | 7             | 0           | 2.288057                | -1.676310 | -0.111692 |
| 5             | 6             | 0           | 1.676493                | -0.638838 | 0.687418  |
| 6             | 6             | 0           | 2.160006                | 0.771288  | 0.378605  |
| 7             | 1             | 0           | 1.987399                | 1.384476  | 1.262754  |
| 8             | 1             | 0           | 3.013108                | -2.254412 | 0.292434  |
| 9             | 15            | 0           | -1.892184               | -1.148477 | -0.727073 |
| 10            | 15            | 0           | -1.318586               | 1.717223  | 0.464876  |
| 11            | 6             | 0           | 3.591002                | 0.913881  | -0.109624 |
| 12            | 6             | 0           | 4.641949                | 0.812968  | 0.813998  |
| 13            | 6             | 0           | 3.892661                | 1.140844  | -1.455930 |
| 14            | 6             | 0           | 5.967358                | 0.933298  | 0.394760  |
| 15            | 1             | 0           | 4.422929                | 0.645590  | 1.863785  |
| 16            | 6             | 0           | 5.220382                | 1.261593  | -1.878230 |
| 17            | 1             | 0           | 3.088987                | 1.229289  | -2.180498 |
| 18            | 6             | 0           | 6.261287                | 1.157034  | -0.954263 |

|    |   |   |           |           |           |
|----|---|---|-----------|-----------|-----------|
| 19 | 1 | 0 | 6.769202  | 0.856880  | 1.121340  |
| 20 | 1 | 0 | 5.436926  | 1.439253  | -2.926098 |
| 21 | 1 | 0 | 7.291633  | 1.252271  | -1.278998 |
| 22 | 6 | 0 | 2.768486  | -2.820629 | -2.223221 |
| 23 | 1 | 0 | 2.076534  | -3.435181 | -2.801513 |
| 24 | 1 | 0 | 3.395132  | -2.265824 | -2.926971 |
| 25 | 1 | 0 | 3.407218  | -3.459451 | -1.612575 |
| 26 | 6 | 0 | 1.548411  | -0.978557 | 2.106627  |
| 27 | 8 | 0 | 1.359786  | -0.179326 | 3.014627  |
| 28 | 8 | 0 | 1.661660  | -2.309287 | 2.333228  |
| 29 | 6 | 0 | 1.551920  | -2.739238 | 3.701775  |
| 30 | 1 | 0 | 1.675971  | -3.820229 | 3.675692  |
| 31 | 1 | 0 | 2.333656  | -2.281228 | 4.309818  |
| 32 | 1 | 0 | 0.573266  | -2.479448 | 4.108277  |
| 33 | 6 | 0 | -1.279024 | 3.463964  | -0.288562 |
| 34 | 6 | 0 | -2.112696 | 4.440887  | 0.567912  |
| 35 | 1 | 0 | -2.069702 | 5.429721  | 0.099679  |
| 36 | 1 | 0 | -3.165920 | 4.155803  | 0.622812  |
| 37 | 1 | 0 | -1.725139 | 4.546663  | 1.582762  |
| 38 | 6 | 0 | -1.842358 | 3.462846  | -1.720047 |
| 39 | 1 | 0 | -1.748746 | 4.472587  | -2.133123 |
| 40 | 1 | 0 | -1.299308 | 2.781619  | -2.377983 |
| 41 | 1 | 0 | -2.902823 | 3.200756  | -1.743961 |
| 42 | 6 | 0 | 0.185372  | 3.947921  | -0.318368 |
| 43 | 1 | 0 | 0.648769  | 3.942468  | 0.672116  |
| 44 | 1 | 0 | 0.799301  | 3.349390  | -0.995023 |
| 45 | 1 | 0 | 0.207821  | 4.980011  | -0.682898 |
| 46 | 6 | 0 | -1.109077 | 1.944929  | 2.292864  |
| 47 | 1 | 0 | -0.553934 | 2.856343  | 2.521136  |
| 48 | 1 | 0 | -0.517238 | 1.104788  | 2.660959  |
| 49 | 6 | 0 | -1.985809 | -2.809950 | 0.177126  |
| 50 | 6 | 0 | -0.795015 | -3.677020 | -0.277052 |
| 51 | 1 | 0 | 0.154687  | -3.261467 | 0.058902  |
| 52 | 1 | 0 | -0.897597 | -4.671441 | 0.169461  |
| 53 | 1 | 0 | -0.760217 | -3.805891 | -1.361846 |
| 54 | 6 | 0 | -3.303381 | -3.536583 | -0.169903 |
| 55 | 1 | 0 | -3.328264 | -4.476660 | 0.391198  |
| 56 | 1 | 0 | -4.189742 | -2.966273 | 0.117456  |
| 57 | 1 | 0 | -3.378522 | -3.789873 | -1.229383 |
| 58 | 6 | 0 | -1.915046 | -2.599281 | 1.699381  |
| 59 | 1 | 0 | -1.061907 | -1.984705 | 1.990713  |
| 60 | 1 | 0 | -2.827139 | -2.143486 | 2.090273  |
| 61 | 1 | 0 | -1.807492 | -3.574176 | 2.185706  |
| 62 | 6 | 0 | -2.377642 | -1.495305 | -2.485617 |
| 63 | 1 | 0 | -2.244538 | -2.547049 | -2.739849 |
| 64 | 1 | 0 | -1.716076 | -0.911773 | -3.126700 |
| 65 | 6 | 0 | -3.101980 | 1.124373  | 0.564565  |
| 66 | 6 | 0 | -3.399015 | -0.103961 | -0.318568 |
| 67 | 1 | 0 | 1.542831  | 1.284978  | -0.443156 |
| 68 | 1 | 0 | -0.724249 | 0.856738  | -1.813199 |
| 69 | 1 | 0 | -4.100956 | -0.751965 | 0.213906  |
| 70 | 1 | 0 | -3.737188 | 1.950054  | 0.231532  |
| 71 | 6 | 0 | -4.002021 | 0.217748  | -1.708119 |
| 72 | 1 | 0 | -5.049519 | 0.513687  | -1.602150 |
| 73 | 1 | 0 | -3.469993 | 1.063150  | -2.153741 |
| 74 | 6 | 0 | -3.840475 | -1.014651 | -2.608755 |
| 75 | 1 | 0 | -4.082939 | -0.783165 | -3.649077 |
| 76 | 1 | 0 | -4.523618 | -1.805055 | -2.284884 |
| 77 | 6 | 0 | -3.346248 | 0.898311  | 2.077816  |
| 78 | 1 | 0 | -4.415941 | 0.955661  | 2.297778  |
| 79 | 1 | 0 | -3.014392 | -0.105634 | 2.352242  |
| 80 | 6 | 0 | -2.535821 | 1.924351  | 2.881105  |
| 81 | 1 | 0 | -2.509863 | 1.662407  | 3.942426  |
| 82 | 1 | 0 | -2.996343 | 2.912731  | 2.804257  |

TS8

Standard orientation:

| Center Number | Atomic Number | Atomic Type | Coordinates (Angstroms) |           |           |
|---------------|---------------|-------------|-------------------------|-----------|-----------|
|               |               |             | X                       | Y         | Z         |
| 1             | 45            | 0           | -0.261134               | -0.264309 | -0.338440 |
| 2             | 8             | 0           | 0.321456                | -2.141426 | -1.182589 |
| 3             | 6             | 0           | 1.557743                | -2.278138 | -1.347919 |
| 4             | 7             | 0           | 2.396904                | -1.315001 | -0.971372 |
| 5             | 6             | 0           | 1.984109                | -0.136559 | -0.227544 |
| 6             | 6             | 0           | 2.969762                | 1.025757  | -0.524144 |
| 7             | 1             | 0           | 2.707393                | 1.850550  | 0.135877  |
| 8             | 1             | 0           | 3.390281                | -1.448871 | -1.113532 |
| 9             | 15            | 0           | -2.519097               | -0.965942 | -0.397264 |
| 10            | 15            | 0           | -1.128828               | 1.788695  | 0.273286  |
| 11            | 6             | 0           | 4.434687                | 0.662699  | -0.336074 |
| 12            | 6             | 0           | 5.038107                | 0.678732  | 0.932058  |
| 13            | 6             | 0           | 5.221654                | 0.312901  | -1.444284 |
| 14            | 6             | 0           | 6.383924                | 0.341747  | 1.086076  |
| 15            | 1             | 0           | 4.452739                | 0.963925  | 1.798414  |
| 16            | 6             | 0           | 6.569335                | -0.026911 | -1.292111 |
| 17            | 1             | 0           | 4.782314                | 0.321982  | -2.437448 |
| 18            | 6             | 0           | 7.153757                | -0.016429 | -0.024526 |
| 19            | 1             | 0           | 6.832751                | 0.364887  | 2.073442  |
| 20            | 1             | 0           | 7.159124                | -0.291203 | -2.163172 |
| 21            | 1             | 0           | 8.199630                | -0.276278 | 0.097233  |
| 22            | 6             | 0           | 2.106181                | -3.526689 | -1.970716 |
| 23            | 1             | 0           | 1.508545                | -3.784929 | -2.846837 |
| 24            | 1             | 0           | 3.153298                | -3.426586 | -2.255841 |
| 25            | 1             | 0           | 2.015191                | -4.346240 | -1.249761 |
| 26            | 6             | 0           | 1.889633                | -0.383397 | 1.273267  |
| 27            | 8             | 0           | 1.959071                | 0.498863  | 2.109545  |
| 28            | 8             | 0           | 1.781597                | -1.684259 | 1.589203  |
| 29            | 6             | 0           | 1.710116                | -1.995788 | 2.995222  |
| 30            | 1             | 0           | 1.617133                | -3.078444 | 3.045619  |
| 31            | 1             | 0           | 2.618343                | -1.665313 | 3.500969  |
| 32            | 1             | 0           | 0.841877                | -1.514630 | 3.447552  |
| 33            | 6             | 0           | -0.848379               | 3.284300  | -0.873085 |
| 34            | 6             | 0           | -1.742122               | 4.479870  | -0.482688 |
| 35            | 1             | 0           | -1.471166               | 5.332681  | -1.114220 |
| 36            | 1             | 0           | -2.803675               | 4.286093  | -0.646646 |
| 37            | 1             | 0           | -1.603406               | 4.790212  | 0.555607  |
| 38            | 6             | 0           | -1.139463               | 2.888363  | -2.332761 |
| 39            | 1             | 0           | -0.891605               | 3.729780  | -2.988985 |
| 40            | 1             | 0           | -0.545236               | 2.026286  | -2.645541 |
| 41            | 1             | 0           | -2.193893               | 2.652080  | -2.494246 |
| 42            | 6             | 0           | 0.623757                | 3.722932  | -0.759669 |
| 43            | 1             | 0           | 0.908897                | 3.975969  | 0.264930  |
| 44            | 1             | 0           | 1.301369                | 2.956159  | -1.131175 |
| 45            | 1             | 0           | 0.774938                | 4.616177  | -1.374929 |
| 46            | 6             | 0           | -0.725739               | 2.354118  | 1.990070  |
| 47            | 1             | 0           | 0.289839                | 2.063356  | 2.254641  |
| 48            | 1             | 0           | -0.812006               | 3.442525  | 2.051386  |
| 49            | 6             | 0           | -2.971077               | -2.439566 | 0.710356  |
| 50            | 6             | 0           | -2.137342               | -3.662261 | 0.280191  |
| 51            | 1             | 0           | -1.066414               | -3.474405 | 0.362116  |
| 52            | 1             | 0           | -2.390992               | -4.505289 | 0.932046  |
| 53            | 1             | 0           | -2.351521               | -3.966166 | -0.748031 |
| 54            | 6             | 0           | -4.468083               | -2.789097 | 0.601612  |
| 55            | 1             | 0           | -4.677586               | -3.631434 | 1.270090  |
| 56            | 1             | 0           | -5.118096               | -1.965357 | 0.905260  |
| 57            | 1             | 0           | -4.748044               | -3.099245 | -0.407907 |
| 58            | 6             | 0           | -2.629951               | -2.077810 | 2.167468  |

|    |   |   |           |           |           |    |    |   |           |           |           |
|----|---|---|-----------|-----------|-----------|----|----|---|-----------|-----------|-----------|
| 59 | 1 | 0 | -1.571699 | -1.830648 | 2.285737  | 34 | 1  | 0 | -4.102750 | -2.074710 | 1.973953  |
| 60 | 1 | 0 | -3.225221 | -1.237269 | 2.533455  | 35 | 1  | 0 | -2.475760 | -3.373441 | -0.977292 |
| 61 | 1 | 0 | -2.847452 | -2.936518 | 2.811499  | 36 | 1  | 0 | -2.007611 | -2.151515 | -2.144927 |
| 62 | 6 | 0 | -3.213375 | -1.331793 | -2.081097 | 37 | 45 | 0 | 0.131317  | -0.172918 | -0.713165 |
| 63 | 6 | 0 | -2.999787 | 1.685877  | 0.597668  | 38 | 8  | 0 | 1.648350  | 0.928548  | -1.806951 |
| 64 | 6 | 0 | -3.687474 | 0.449756  | -0.020691 | 39 | 6  | 0 | 2.770010  | 0.369205  | -1.890626 |
| 65 | 1 | 0 | 2.822341  | 1.355747  | -1.554329 | 40 | 7  | 0 | 2.956880  | -0.809962 | -1.301947 |
| 66 | 1 | 0 | 0.834839  | 0.513676  | -1.150826 | 41 | 1  | 0 | 3.878001  | -1.227903 | -1.328344 |
| 67 | 1 | 0 | -4.442952 | 0.081679  | 0.677916  | 42 | 6  | 0 | 3.891694  | 1.019836  | -2.642778 |
| 68 | 1 | 0 | -3.450421 | 2.557652  | 0.124043  | 43 | 1  | 0 | 4.157752  | 1.956606  | -2.146969 |
| 69 | 6 | 0 | -3.151024 | 1.858121  | 2.143757  | 44 | 1  | 0 | 4.773671  | 0.382761  | -2.704155 |
| 70 | 1 | 0 | -3.513806 | 2.871262  | 2.340502  | 45 | 1  | 0 | 3.544393  | 1.262543  | -3.649319 |
| 71 | 1 | 0 | -3.907188 | 1.174061  | 2.538082  | 46 | 6  | 0 | 1.918355  | -1.431574 | -0.509040 |
| 72 | 6 | 0 | -1.797903 | 1.674248  | 2.855671  | 47 | 6  | 0 | 1.543996  | -0.813224 | 0.755314  |
| 73 | 1 | 0 | -1.821238 | 2.102199  | 3.861831  | 48 | 1  | 0 | 1.067251  | -1.535979 | 1.404949  |
| 74 | 1 | 0 | -1.560866 | 0.611863  | 2.965230  | 49 | 6  | 0 | 2.392765  | 0.107684  | 1.569666  |
| 75 | 6 | 0 | -4.385700 | 0.737562  | -1.376604 | 50 | 6  | 0 | 2.878563  | 1.360259  | 1.158793  |
| 76 | 1 | 0 | -5.340663 | 1.243589  | -1.208100 | 51 | 6  | 0 | 2.741258  | -0.335023 | 2.861534  |
| 77 | 1 | 0 | -3.764775 | 1.418032  | -1.966982 | 52 | 6  | 0 | 3.701575  | 2.122092  | 1.990793  |
| 78 | 6 | 0 | -4.558752 | -0.578664 | -2.145318 | 53 | 1  | 0 | 2.586815  | 1.769820  | 0.202494  |
| 79 | 1 | 0 | -4.853192 | -0.397772 | -3.182823 | 54 | 6  | 0 | 3.562704  | 0.424318  | 3.694688  |
| 80 | 1 | 0 | -5.348185 | -1.180188 | -1.686005 | 55 | 1  | 0 | 2.370530  | -1.293049 | 3.211588  |
| 81 | 1 | 0 | -2.510382 | -0.939215 | -2.818812 | 56 | 6  | 0 | 4.052988  | 1.658241  | 3.259968  |
| 82 | 1 | 0 | -3.304147 | -2.405511 | -2.252625 | 57 | 1  | 0 | 4.058687  | 3.086785  | 1.646232  |
|    |   |   |           |           |           | 58 | 1  | 0 | 3.816183  | 0.052277  | 4.681657  |
|    |   |   |           |           |           | 59 | 1  | 0 | 4.690040  | 2.253711  | 3.904669  |
|    |   |   |           |           |           | 60 | 6  | 0 | 1.951573  | -2.923090 | -0.609603 |
|    |   |   |           |           |           | 61 | 8  | 0 | 1.915937  | -3.650328 | 0.366638  |
|    |   |   |           |           |           | 62 | 8  | 0 | 2.088467  | -3.527909 | -1.808538 |
|    |   |   |           |           |           | 63 | 6  | 0 | 1.905335  | -2.886155 | -3.084155 |
|    |   |   |           |           |           | 64 | 1  | 0 | 1.580995  | -3.676903 | -3.759532 |
|    |   |   |           |           |           | 65 | 1  | 0 | 1.141878  | -2.112588 | -3.030915 |
|    |   |   |           |           |           | 66 | 1  | 0 | 2.847183  | -2.466485 | -3.438159 |
|    |   |   |           |           |           | 67 | 1  | 0 | -0.835789 | 0.036327  | -2.389127 |
|    |   |   |           |           |           | 68 | 1  | 0 | -0.413049 | -0.616079 | -2.502231 |
|    |   |   |           |           |           | 69 | 1  | 0 | -3.803453 | -0.282680 | 1.052839  |
|    |   |   |           |           |           | 70 | 6  | 0 | -4.028496 | -0.319478 | -1.090547 |
|    |   |   |           |           |           | 71 | 1  | 0 | -5.044966 | 0.067983  | -0.974213 |
|    |   |   |           |           |           | 72 | 1  | 0 | -3.587939 | 0.203127  | -1.946636 |
|    |   |   |           |           |           | 73 | 6  | 0 | -3.084310 | 2.157370  | 1.671043  |
|    |   |   |           |           |           | 74 | 1  | 0 | -3.397193 | 3.190776  | 1.496784  |
|    |   |   |           |           |           | 75 | 1  | 0 | -3.906670 | 1.665339  | 2.198437  |
|    |   |   |           |           |           | 76 | 1  | 0 | -3.419146 | 2.007549  | -0.460836 |
|    |   |   |           |           |           | 77 | 6  | 0 | -4.016292 | -1.827936 | -1.356042 |
|    |   |   |           |           |           | 78 | 1  | 0 | -4.403873 | -2.058307 | -2.352068 |
|    |   |   |           |           |           | 79 | 1  | 0 | -4.657939 | -2.340852 | -0.635377 |
|    |   |   |           |           |           | 80 | 6  | 0 | -1.793664 | 2.161805  | 2.508548  |
|    |   |   |           |           |           | 81 | 1  | 0 | -1.870852 | 2.866386  | 3.341386  |
|    |   |   |           |           |           | 82 | 1  | 0 | -1.617435 | 1.178828  | 2.945120  |

14

Standard orientation:

| Center Number | Atomic Number | Atomic Type | Coordinates (Angstroms) |           |           |
|---------------|---------------|-------------|-------------------------|-----------|-----------|
|               |               |             | X                       | Y         | Z         |
| 1             | 6             | 0           | -2.828425               | 1.485781  | 0.294366  |
| 2             | 6             | 0           | -3.200405               | -0.012432 | 0.183444  |
| 3             | 15            | 0           | -1.019210               | 1.826164  | -0.086801 |
| 4             | 15            | 0           | -1.775853               | -1.264492 | 0.113544  |
| 5             | 6             | 0           | -0.616859               | 2.537140  | 1.588297  |
| 6             | 1             | 0           | 0.338089                | 2.153956  | 1.946316  |
| 7             | 1             | 0           | -0.525563               | 3.621165  | 1.496395  |
| 8             | 6             | 0           | -2.557772               | -2.312967 | -1.218206 |
| 9             | 6             | 0           | -0.967246               | 3.319398  | -1.269823 |
| 10            | 6             | 0           | -1.298606               | 2.855805  | -2.700586 |
| 11            | 1             | 0           | -0.555226               | 2.154720  | -3.084203 |
| 12            | 1             | 0           | -2.287379               | 2.391829  | -2.767332 |
| 13            | 1             | 0           | -1.304734               | 3.726547  | -3.364929 |
| 14            | 6             | 0           | 0.452056                | 3.922843  | -1.239587 |
| 15            | 1             | 0           | 0.490850                | 4.765642  | -1.938589 |
| 16            | 1             | 0           | 0.714851                | 4.308609  | -0.251255 |
| 17            | 1             | 0           | 1.205914                | 3.196460  | -1.542940 |
| 18            | 6             | 0           | -1.980304               | 4.403469  | -0.848530 |
| 19            | 1             | 0           | -1.802297               | 4.779983  | 0.161222  |
| 20            | 1             | 0           | -1.877618               | 5.253692  | -1.531591 |
| 21            | 1             | 0           | -3.015523               | 4.061026  | -0.913611 |
| 22            | 6             | 0           | -1.918734               | -2.342034 | 1.686519  |
| 23            | 6             | 0           | -1.541153               | -1.523010 | 2.932482  |
| 24            | 1             | 0           | -0.564396               | -1.043567 | 2.845831  |
| 25            | 1             | 0           | -2.287034               | -0.754944 | 3.146241  |
| 26            | 1             | 0           | -1.508753               | -2.191187 | 3.799305  |
| 27            | 6             | 0           | -0.992532               | -3.563839 | 1.558203  |
| 28            | 1             | 0           | -1.133586               | -4.197649 | 2.440496  |
| 29            | 1             | 0           | -1.229965               | -4.171512 | 0.681340  |
| 30            | 1             | 0           | 0.060502                | -3.300755 | 1.503858  |
| 31            | 6             | 0           | -3.360689               | -2.867095 | 1.864565  |
| 32            | 1             | 0           | -3.668375               | -3.526421 | 1.051060  |
| 33            | 1             | 0           | -3.386534               | -3.458795 | 2.785890  |

TS8

Standard orientation:

| Center Number | Atomic Number | Atomic Type | Coordinates (Angstroms) |           |           |
|---------------|---------------|-------------|-------------------------|-----------|-----------|
|               |               |             | X                       | Y         | Z         |
| 1             | 6             | 0           | -2.311877               | 2.115608  | -0.001770 |
| 2             | 6             | 0           | -3.096504               | 0.781065  | 0.019643  |
| 3             | 15            | 0           | -0.456062               | 1.923041  | -0.240612 |
| 4             | 15            | 0           | -2.114615               | -0.835033 | 0.080579  |
| 5             | 6             | 0           | 0.010347                | 2.715471  | 1.379641  |
| 6             | 1             | 0           | 0.803405                | 2.152726  | 1.869575  |
| 7             | 1             | 0           | 0.390950                | 3.719492  | 1.181977  |
| 8             | 6             | 0           | -3.200914               | -1.726135 | -1.147007 |

|    |    |   |           |           |           |        |                       |        |                         |           |           |
|----|----|---|-----------|-----------|-----------|--------|-----------------------|--------|-------------------------|-----------|-----------|
| 9  | 6  | 0 | 0.048091  | 3.187223  | -1.571732 | 74     | 1                     | 0      | -3.430678               | 0.890580  | -2.122186 |
| 10 | 6  | 0 | -0.356786 | 2.661274  | -2.962116 | 75     | 6                     | 0      | -4.451546               | -0.843925 | -1.338679 |
| 11 | 1  | 0 | 0.155048  | 1.730593  | -3.209472 | 76     | 1                     | 0      | -5.199394               | -1.065709 | -0.573492 |
| 12 | 1  | 0 | -1.435442 | 2.497320  | -3.043039 | 77     | 1                     | 0      | -4.915131               | -1.044308 | -2.308448 |
| 13 | 1  | 0 | -0.083742 | 3.408133  | -3.715578 | 78     | 6                     | 0      | -1.282697               | 2.771706  | 2.215370  |
| 14 | 6  | 0 | 1.577893  | 3.376067  | -1.515294 | 79     | 1                     | 0      | -1.410312               | 1.831818  | 2.754007  |
| 15 | 1  | 0 | 1.873259  | 4.090575  | -2.291445 | 80     | 1                     | 0      | -1.221225               | 3.562093  | 2.968720  |
| 16 | 1  | 0 | 1.908826  | 3.782615  | -0.555920 | 81     | 1                     | 0      | -3.734806               | 0.771759  | 0.906356  |
| 17 | 1  | 0 | 2.106574  | 2.441298  | -1.700711 | 82     | 1                     | 0      | -2.677050               | 2.671495  | -0.867420 |
| 18 | 6  | 0 | -0.630301 | 4.553062  | -1.338397 | -----  |                       |        |                         |           |           |
| 19 | 1  | 0 | -0.382659 | 4.989322  | -0.368414 | -----  |                       |        |                         |           |           |
| 20 | 1  | 0 | -0.274092 | 5.248969  | -2.105643 | -----  |                       |        |                         |           |           |
| 21 | 1  | 0 | -1.717599 | 4.502693  | -1.429236 | 15     | Standard orientation: |        |                         |           |           |
| 22 | 6  | 0 | -2.528104 | -1.672704 | 1.745994  | -----  |                       |        |                         |           |           |
| 23 | 6  | 0 | -1.963319 | -0.858666 | 2.922535  | Center | Atomic                | Atomic | Coordinates (Angstroms) |           |           |
| 24 | 1  | 0 | -0.900922 | -0.635001 | 2.815568  | Number | Number                | Type   | X                       | Y         | Z         |
| 25 | 1  | 0 | -2.501695 | 0.082074  | 3.053566  | -----  |                       |        |                         |           |           |
| 26 | 1  | 0 | -2.090584 | -1.434610 | 3.844871  | 1      | 6                     | 0      | -2.953601               | 1.290305  | 0.550176  |
| 27 | 6  | 0 | -1.933238 | -3.090782 | 1.752831  | 2      | 6                     | 0      | -3.419453               | -0.182500 | 0.502953  |
| 28 | 1  | 0 | -2.255140 | -3.598399 | 2.668595  | 3      | 15                    | 0      | -1.292944               | 1.635239  | -0.292564 |
| 29 | 1  | 0 | -2.281794 | -3.692225 | 0.908959  | 4      | 15                    | 0      | -2.067383               | -1.468262 | 0.186510  |
| 30 | 1  | 0 | -0.846268 | -3.087794 | 1.742137  | 5      | 6                     | 0      | -0.656032               | 2.701639  | 1.098497  |
| 31 | 6  | 0 | -4.057438 | -1.793041 | 1.931102  | 6      | 1                     | 0      | -0.111876               | 3.569289  | 0.720598  |
| 32 | 1  | 0 | -4.522039 | -2.438492 | 1.183588  | 7      | 1                     | 0      | 0.052847                | 2.100554  | 1.673638  |
| 33 | 1  | 0 | -4.236741 | -2.251877 | 2.909317  | 8      | 6                     | 0      | -3.119529               | -2.532831 | -0.917840 |
| 34 | 1  | 0 | -4.571127 | -0.829768 | 1.931690  | 9      | 6                     | 0      | -1.599434               | 2.828197  | -1.735255 |
| 35 | 1  | 0 | -3.431383 | -2.736214 | -0.806692 | 10     | 6                     | 0      | -2.413648               | 2.104976  | -2.824393 |
| 36 | 1  | 0 | -2.646000 | -1.815322 | -2.079781 | 11     | 1                     | 0      | -1.928028               | 1.182401  | -3.151919 |
| 37 | 45 | 0 | 0.029702  | -0.412414 | -0.768557 | 12     | 1                     | 0      | -3.424444               | 1.861397  | -2.486551 |
| 38 | 8  | 0 | 1.743527  | 0.096407  | -2.010147 | 13     | 1                     | 0      | -2.511524               | 2.761683  | -3.695769 |
| 39 | 6  | 0 | 2.743660  | -0.650287 | -1.907120 | 14     | 6                     | 0      | -0.218245               | 3.210376  | -2.306790 |
| 40 | 7  | 0 | 2.738297  | -1.640617 | -1.012807 | 15     | 1                     | 0      | -0.357400               | 3.874094  | -3.167501 |
| 41 | 1  | 0 | 3.563680  | -2.218526 | -0.915557 | 16     | 1                     | 0      | 0.393850                | 3.746373  | -1.575428 |
| 42 | 6  | 0 | 3.949042  | -0.435854 | -2.773447 | 17     | 1                     | 0      | 0.337858                | 2.331073  | -2.636619 |
| 43 | 1  | 0 | 4.681137  | -1.236494 | -2.670592 | 18     | 6                     | 0      | -2.343583               | 4.109123  | -1.313896 |
| 44 | 1  | 0 | 3.624543  | -0.365447 | -3.813324 | 19     | 1                     | 0      | -1.778891               | 4.693691  | -0.583849 |
| 45 | 1  | 0 | 4.418547  | 0.513808  | -2.504458 | 20     | 1                     | 0      | -2.485362               | 4.741874  | -2.197509 |
| 46 | 6  | 0 | 1.626263  | -1.859428 | -0.118311 | 21     | 1                     | 0      | -3.334177               | 3.902432  | -0.900782 |
| 47 | 6  | 0 | 1.411772  | -0.978771 | 0.979665  | 22     | 6                     | 0      | -1.744483               | -2.481048 | 1.753875  |
| 48 | 1  | 0 | 0.747041  | -1.423279 | 1.708740  | 23     | 6                     | 0      | -1.038820               | -1.596984 | 2.798884  |
| 49 | 6  | 0 | 2.362471  | -0.042204 | 1.624291  | 24     | 1                     | 0      | -0.121566               | -1.150649 | 2.405889  |
| 50 | 6  | 0 | 2.354141  | -0.023091 | 3.035083  | 25     | 1                     | 0      | -1.684083               | -0.794225 | 3.162092  |
| 51 | 6  | 0 | 3.278869  | 0.803071  | 0.972514  | 26     | 1                     | 0      | -0.767009               | -2.211599 | 3.663680  |
| 52 | 6  | 0 | 3.228429  | 0.784782  | 3.760810  | 27     | 6                     | 0      | -0.820029               | -3.660833 | 1.387677  |
| 53 | 1  | 0 | 1.656955  | -0.660449 | 3.568884  | 28     | 1                     | 0      | -0.644006               | -4.260387 | 2.287046  |
| 54 | 6  | 0 | 4.157046  | 1.609011  | 1.697207  | 29     | 1                     | 0      | -1.263723               | -4.318754 | 0.635676  |
| 55 | 1  | 0 | 3.294734  | 0.874812  | -0.103815 | 30     | 1                     | 0      | 0.144782                | -3.316238 | 1.012978  |
| 56 | 6  | 0 | 4.140795  | 1.605272  | 3.093981  | 31     | 6                     | 0      | -3.055293               | -3.034884 | 2.345749  |
| 57 | 1  | 0 | 3.195287  | 0.770793  | 4.844851  | 32     | 1                     | 0      | -3.574691               | -3.701832 | 1.653507  |
| 58 | 1  | 0 | 4.849176  | 2.251519  | 1.163659  | 33     | 1                     | 0      | -2.814706               | -3.618917 | 3.240718  |
| 59 | 1  | 0 | 4.822452  | 2.237264  | 3.652231  | 34     | 1                     | 0      | -3.745843               | -2.245732 | 2.651464  |
| 60 | 6  | 0 | 1.303200  | -3.321587 | 0.056586  | 35     | 1                     | 0      | -3.015860               | -3.589652 | -0.667730 |
| 61 | 8  | 0 | 1.103935  | -3.799607 | 1.157366  | 36     | 1                     | 0      | -2.757454               | -2.400230 | -1.938263 |
| 62 | 8  | 0 | 1.304323  | -4.171404 | -0.983642 | 37     | 45                    | 0      | -0.249799               | -0.529410 | -0.721462 |
| 63 | 6  | 0 | 1.336649  | -3.816971 | -2.381298 | 38     | 8                     | 0      | 1.524259                | 0.275302  | -1.781397 |
| 64 | 1  | 0 | 0.881417  | -4.662575 | -2.894914 | 39     | 6                     | 0      | 2.727510                | 0.103895  | -2.012976 |
| 65 | 1  | 0 | 0.761163  | -2.913510 | -2.574256 | 40     | 7                     | 0      | 3.561993                | -0.611724 | -1.220624 |
| 66 | 1  | 0 | 2.366629  | -3.697613 | -2.716691 | 41     | 1                     | 0      | 4.518989                | -0.694749 | -1.536661 |
| 67 | 1  | 0 | -0.846663 | -0.165898 | -2.075384 | 42     | 6                     | 0      | 3.342551                | 0.719229  | -3.245202 |
| 68 | 1  | 0 | -0.407377 | -1.363380 | -1.977030 | 43     | 1                     | 0      | 3.168856                | 1.797392  | -3.221290 |
| 69 | 6  | 0 | -2.464359 | 3.008112  | 1.259657  | 44     | 1                     | 0      | 4.412463                | 0.528818  | -3.331621 |
| 70 | 1  | 0 | -2.463381 | 4.056053  | 0.946506  | 45     | 1                     | 0      | 2.831890                | 0.320267  | -4.124969 |
| 71 | 1  | 0 | -3.424739 | 2.828153  | 1.751271  | 46     | 6                     | 0      | 3.223297                | -1.259037 | 0.001829  |
| 72 | 6  | 0 | -4.001854 | 0.616103  | -1.228158 | 47     | 6                     | 0      | 3.022532                | -0.596435 | 1.167112  |
| 73 | 1  | 0 | -4.850017 | 1.304304  | -1.166459 | 48     | 1                     | 0      | 2.752198                | -1.249633 | 1.989970  |



|    |   |   |           |           |           |
|----|---|---|-----------|-----------|-----------|
| 49 | 6 | 0 | 3.130761  | 0.810849  | 1.542355  |
| 50 | 6 | 0 | 2.698712  | 1.146241  | 2.844006  |
| 51 | 6 | 0 | 3.686245  | 1.834171  | 0.745504  |
| 52 | 6 | 0 | 2.796172  | 2.448776  | 3.326498  |
| 53 | 1 | 0 | 2.286726  | 0.369135  | 3.479046  |
| 54 | 6 | 0 | 3.790847  | 3.134119  | 1.232999  |
| 55 | 1 | 0 | 4.060786  | 1.617657  | -0.243855 |
| 56 | 6 | 0 | 3.342573  | 3.449709  | 2.519961  |
| 57 | 1 | 0 | 2.453990  | 2.679756  | 4.328982  |
| 58 | 1 | 0 | 4.228217  | 3.904179  | 0.607366  |
| 59 | 1 | 0 | 3.425923  | 4.465076  | 2.891271  |
| 60 | 6 | 0 | 3.206853  | -2.760226 | 0.068054  |
| 61 | 8 | 0 | 3.238824  | -3.339377 | 1.139188  |
| 62 | 8 | 0 | 3.244253  | -3.525958 | -1.036001 |
| 63 | 6 | 0 | 2.803947  | -3.154622 | -2.361095 |
| 64 | 1 | 0 | 2.529717  | -4.097042 | -2.833988 |
| 65 | 1 | 0 | 1.930156  | -2.506473 | -2.315704 |
| 66 | 1 | 0 | 3.617651  | -2.693108 | -2.919437 |
| 67 | 1 | 0 | -1.016160 | -0.702456 | -2.011308 |
| 68 | 1 | 0 | 0.221296  | -2.023580 | -1.021373 |
| 69 | 1 | 0 | -3.870557 | -0.427430 | 1.469153  |
| 70 | 6 | 0 | -4.470403 | -0.485282 | -0.592177 |
| 71 | 1 | 0 | -5.434414 | -0.045617 | -0.319526 |
| 72 | 1 | 0 | -4.162340 | -0.025184 | -1.536823 |
| 73 | 6 | 0 | -4.561123 | -2.005442 | -0.774872 |
| 74 | 1 | 0 | -5.159720 | -2.269239 | -1.651019 |
| 75 | 1 | 0 | -5.046879 | -2.457311 | 0.095446  |
| 76 | 6 | 0 | -2.797990 | 1.845379  | 1.989253  |
| 77 | 1 | 0 | -3.779773 | 2.078275  | 2.413014  |
| 78 | 1 | 0 | -2.351402 | 1.079116  | 2.629500  |
| 79 | 6 | 0 | -1.876473 | 3.069923  | 1.965555  |
| 80 | 1 | 0 | -1.568826 | 3.354654  | 2.976336  |
| 81 | 1 | 0 | -2.401320 | 3.927378  | 1.536056  |
| 82 | 1 | 0 | -3.706122 | 1.893879  | 0.034079  |

---
